# Supplementary material for: Har-P, a short P-element variant, weaponizes P-transposase to severely impair Drosophila development
Source: eLife. 2019 Dec 17;8:e49948. doi: 10.7554/eLife.49948 (PMC6917496; doi:10.7554/eLife.49948)
Supplement: Figure 1—source data 1. [file elife-49948-fig1-data1.xlsx]

## Sheet: Fig1B_GD
VIAL ID	Date	Female in cross	Male in cross	Phenotypic marker	F1 female with >2 eggs (fertile)	Dysgenic F1 females	% Dysgenic females	Notes	n= F1 females assayed
ISO1-UC	2017-10-12	ISO1-UC	ISO1-UC	wt eyes	26	8	0.235294
ISO1-UC	2018-07-12	ISO1-UC	ISO1-UC	wt eyes	44	18	0.290323
ISO1-UC	2018-07-17	ISO1-UC	ISO1-UC	wt eyes	35	9	0.204545
ISO1-UC		ISO1-UC	ISO1-UC	wt eyes	105	35	0.25		140
Harwich	2018-06-13	ISO1-UC	Harwich	wt eyes	0	66	1
Harwich	2017-08-30	ISO1-UC	Harwich	wt eyes	0	35	1
Harwich	2018-07-11	ISO1-UC	Harwich	wt eyes	0	62	1
Harwich		ISO1-UC	Harwich	wt eyes	0	163	1		163
56, OreR-MOD	2017-11-24	ISO1-UC	OreR-Mod	wt eyes	25	1	0.0384615
56, OreR-MOD	2018-04-10	ISO1-UC	OreR-MOD	wt eyes	10	0	0
56, OreR-MOD	2018-04-24	ISO1-UC	OreR-MOD	wt eyes	21	9	0.3
56, OreR-MOD	2018-05-25	ISO1-UC	OreR-MOD	wt eyes	26	13	0.333333
56, OreR-MOD	2018-06-04	ISO1-UC	OreR-MOD	wt eyes	27	12	0.307692
56, OreR-MOD		ISO1-UC	OreR_MOD	wt eyes	109	35	0.243056		144
OreR-TK	2017-11-24	ISO1-UC	OreR-TK	wt eyes	23	7	0.233333
54, OreR-TK	2018-04-10	ISO1-UC	OreR-TK	wt eyes	27	6	0.181818
54, OreR-TK	2018-05-25	ISO1-UC	OreR-TK	wt eyes	30	11	0.268293
54, OreR-TK	2018-06-04	ISO1-UC	OreR-TK	wt eyes	7	2	0.222222
54, OreR-TK		ISO1-UC	OreR-TK	wt eyes	87	26	0.230088		113
OreR-Tow	2017-11-24	ISO1-UC	OreR-Tow	wt eyes	31	3	0.0882353
55, OreR-Tow	2018-05-25	ISO1-UC	OreR-Tow	wt eyes	36	12	0.25
OreR-Tow	2017-11-24	ISO1-UC	OreR-Tow	wt eyes	31	3	0.0882353
55, OreR-Tow	2018-06-04	ISO1-UC	OreR-Tow	wt eyes	46	11	0.192982
55, OreR-Tow		ISO1-UC	OreR-Tow	wt eyes	144	29	0.16763		173
128, pi[2]	2018-06-11	ISO1-UC	pi[2]	wt eyes	2	29	0.935484
128, pi[2]	2018-06-06	ISO1-UC	pi[2]	wt eyes	6	59	0.907692
128, pi[2]	2018-04-10	ISO1-UC	pi[2]	wt eyes	1	41	0.97619
128, pi[2]		ISO1-UC	pi[2]	wt eyes	9	129	0.934783		138
VIAL ID	Date	Female in cross	Male in cross	Phenotypic marker	F1 female with >2 eggs (fertile)	Dysgenic F1 females	% Dysgenic females	Notes	n= F1 females assayed
126	2018-06-06	ISO1-UC	RAL-377	wt eyes	0	27	1
126	2018-06-11	ISO1-UC	RAL-377	wt eyes	0	45	1
126	2018-01-22	ISO1-UC	RAL-377	wt eyes	0	30	1
126		ISO1-UC	RAL-377	wt eyes	0	102	1		102
125	2018-06-06	ISO1-UC	RAL-42	wt eyes	1	18	0.947368
125	2018-06-11	ISO1-UC	RAL-42	wt eyes	0	62	1
125	2018-01-22	ISO1-UC	RAL-42	wt eyes	0	36	1
125		ISO1-UC	RAL-42	wt eyes	1	116	0.991453		117
138- Birmingham; Sb[1]/TM6	2018-06-07	ISO1-UC	Birmingham; Sb[1]/TM6	With Stubble bristles	28	9	0.243243
138- Birmingham; Sb[1]/TM6	2018-06-10	ISO1-UC	Birmingham; Sb[1]/TM6	With Stubble bristles	9	7	0.4375
138- Birmingham; Sb[1]/TM6	2018-07-11	ISO1-UC	Birmingham; Sb[1]/TM6	With Stubble bristles	28	7	0.2
138- Birmingham; Sb[1]/TM7	2018-07-17	ISO1-UC	Birmingham; Sb[1]/TM7	With Stubble bristles	40	29	0.42029
138		ISO1-UC	Birmingham; Sb[1]/TM6	wt eyes	105	52	0.33121		157
131,Lk-P(1A)-SL2	2018-04-10	ISO1-UC	Lk-P(1A)-SL2	wsp eyes	28	2	0.0666667
131,Lk-P(1A)-SL2	2018-06-13	ISO1-UC	Lk-P(1A)-SL2	wsp eyes	36	7	0.162791
131,Lk-P(1A)-SL2	2018-06-19	ISO1-UC	Lk-P(1A)-SL2	wsp eyes	28	8	0.222222
131,Lk-P(1A)-SL2		ISO1-UC	Lk-P(1A)-SL2	wsp eyes	92	17	0.155963		109
Male in cross	% F1 female GD	F1 females count
ISO1-UC	0.25	N=140
Harwich	1	N=163
OreR_MOD	0.243056	N=144
OreR-TK	0.230088	N=113
OreR-Tow	0.16763	N=218
pi[2]	0.934783	N=138
RAL-42	0.991453	N=157
Birmingham	0.33121	N=102
RAL-377	1	N=117
Lk-P(1A)-SL2	0.155963	N=109

## Sheet: Fig1C_qPCR
1st Biological replicate SPS060718
Replicate - Strain	Rp49_Ct1	Rp49_Ct2	Rp49_AvgCt	F7a-R7a_Ct1	F7a-R7a_Ct2	F7a-R7a Avg Ct	dCT	ddCT	Total-P RQ%		Strain name	Replicate 1	Replicate 2	Replicate 3	Mean	Stdev
1- ISO1	20.336	20.192	20.264	24.366	24.415	24.3905	4.1265	12.1065	0.000226767		ISO1	0.000226767	6.81938e-05	0	9.83204e-05	0.000116347
1- Harwich	20.004	19.841	19.9225	11.897	11.988	11.9425	-7.98	0	1		Harwich	1	1	1	1	0
1- OreR-TK	19.652	19.595	19.6235	13.091	13.01	13.0505	-6.573	1.407	0.377095		OreR-TOW	0.000233628	0.000142574	0	0.000125401	9.61481e-05
1- OreR-TOW	20.549	20.551	20.55	24.7	24.567	24.6335	4.0835	12.0635	0.000233628		OreR-TK	0.377095	0.407	0.437999	0.407365	0.0248653
1- Birmingham	19.674	19.668	19.671	15.915	15.927	15.921	3.75	-4.23	0.0532897		OreR-mod	1.798	1.613	1.783	1.73133	0.0838981
SPS060718_2nd Biological replicate											pi[2]	0.312083	0.23	0.284	0.275361	0.0340624
Replicate - Strain	Rp49_Ct1	Rp49_Ct2	Rp49_AvgCt	F7a-R7a_Ct1	F7a-R7a_Ct2	F7a-R7a Avg Ct	dCT	ddCT	Total-P RQ%		Lk-P(1A)	0.00723897	0.011	0.01	0.00941299	0.00159055
2 - ISO1	20.08	20.092	20.086	26.078	26.047	26.0625	5.9765	13.84	6.81938e-05		Birmingham	0.0532897	0.082	0.102486	0.0792586	0.0201777
2 - Harwich	19.712	20.056	19.884	12.052	11.989	12.0205	-7.8635	0	1
2 - OreR-TK	19.734	19.838	19.786	13.086	13.141	13.1135	-6.6725	1.191	0.437999
2 - OreR-TOW	20.055	20.087	20.071	24.967	25	24.9835	4.9125	12.776	0.000142574
1- OreR-MOD	19.575	19.728	19.6515	10.986	10.897	10.9415	-8.71	-0.8465	1.79813
1 - pi[2]	20.766	20.842	20.804	14.627	14.614	14.6205	-6.1835	1.68	0.312083
1 - Lk-P(1A)-SL2	19.664	19.801	19.7325	18.924	19.034	18.979	-0.7535	7.11	0.00723897
SPS071818_3rd Biological replicate
Replicate - Strain	Rp49_Ct1	Rp49_Ct2	Rp49_AvgCt	F7a-R7a_Ct1	F7a-R7a_Ct2	F7a-R7a Avg Ct	dCT	ddCT	Total-P RQ%
3- ISO1	19.415	19.213	19.314	24.323	24.415	24.369	5.055	14.7575	3.61035e-05
3- Harwich	19.412	19.247	19.3295	9.612	9.642	9.627	-9.7025	0	1
3- OreR-TK	19.354	19.315	19.3345	11.022	10.835	10.9285	-8.406	1.2965	0.407113
3- OreR-TOW	19.352	19.229	19.2905	26.034	25.869	25.9515	6.661	16.3635	1.18603e-05
2- OreR-mod	20.643	19.932	20.2875	9.805	9.986	9.8955	-10.392	-0.6895	1.61272
SPS071818_repeats
Replicate - Strain	Rp49_Ct1	Rp49_Ct2	Rp49_AvgCt	F7a-R7a_Ct1	F7a-R7a_Ct2	F7a-R7a Avg Ct	dCT	ddCT	Total-P RQ%
4- ISO1	19.918	19.323	19.6205	24.333	24.441	24.387	4.7665	14.212	5.26941e-05
4- Harwich	19.278	18.624	18.951	9.473	9.538	9.5055	-9.4455	0	1
3- OreR-mod	20	19.681	19.8405	9.539	9.582	9.5605	-10.28	-0.8345	1.78324
SPS071918_repeats
Replicate - Strain	Rp49_Ct1	Rp49_Ct2	Rp49_AvgCt	F7a-R7a_Ct1	F7a-R7a_Ct2	F7a-R7a Avg Ct	dCT	ddCT	Total-P RQ%
2- Harwich	19.6	19.336	19.468	11.508	11.435	11.4715	-7.9965	0	1
2- pi[2]	19.609	19.564	19.5865	13.701	13.716	13.7085	-5.878	2.1185	0.230286
2- Lk-P(1A)-SL2	19.231	19.206	19.2185	17.785	17.769	17.777	-1.4415	6.555	0.0106353
2- Birmingham	17.698	18	17.849	13.465	13.461	13.463	-4.386	3.6105	0.0818712
Replicate - Strain	Rp49_Ct1	Rp49_Ct2	Rp49_AvgCt	F7a-R7a_Ct1	F7a-R7a_Ct2	F7a-R7a Avg Ct	dCT	ddCT	Total-P RQ%
3- Harwich	19.707	19.719	19.713	11.657	12.008	11.8325	-7.8805	0	1
3- pi[2]	19.485	19.419	19.452	13.356	13.414	13.385	-6.067	1.8135	0.2845
3- Lk-P(1A)-SL2	19.428	19.524	19.476	18.301	18.216	18.2585	-1.2175	6.663	0.00986818
3- Birmingham	19.929	19.996	19.9625	15.392	15.345	15.3685	-4.594	3.2865	0.102486
1st Biological replicate SPS073018
Replicate - Strain	Rp49_Ct1	Rp49_Ct2	Rp49_AvgCt	F7a-R7a_Ct1	F7a-R7a_Ct2	F7a-R7a Avg Ct	dCT	ddCT	Total-P RQ%
1 - #38 ISO1	20.115	20.135	20.125	27.315	27.497	27.406	7.281	14.8595	3.36391e-05
1 - #53 Har	20.251	20.462	20.3565	12.66	12.896	12.778	-7.5785	0	1
1- 125 RAL-42	17.575	18.094	17.8345	12.533	12.818	12.6755	-5.159	2.4195	0.186921
1- 126 RAL-377	19.525	19.483	19.504	14.698	14.817	14.7575	-4.7465	2.832	0.140437
Replicate - Strain	Rp49_Ct1	Rp49_Ct2	Rp49_AvgCt	F7a-R7a_Ct1	F7a-R7a_Ct2	F7a-R7a Avg Ct	dCT	ddCT	Total-P RQ%
2- ISO1	19.415	19.213	19.314	24.323	24.415	24.369	5.055	14.7575	3.61035e-05
2- Harwich	19.412	19.247	19.3295	9.612	9.642	9.627	-9.7025	0	1
2- RAL-42	20	18.693	19.3465	12.463	12.933	12.698	-6.6485	3.054	0.120408
2- RAL-377	19.473	18.615	19.044	13.049	13.713	13.381	-5.663	4.0395	0.060812
