# Supplementary material for: Har-P, a short P-element variant, weaponizes P-transposase to severely impair Drosophila development
Source: eLife. 2019 Dec 17;8:e49948. doi: 10.7554/eLife.49948 (PMC6917496; doi:10.7554/eLife.49948)
Supplement: Figure 2—source data 1. [file elife-49948-fig2-data1.xlsx]

## Sheet: Fig2B
			2nd round of sublines established from sibling pair mating
	VIAL ID	Date	Female in cross	Male in cross	Phenotypic marker	F1 female with >2 eggs (fertile)	Dysgenic F1 females	% Dysgenic females	Notes	Total F1 assayed
	29.4.3	2018-05-06	ISO1-UC	HISR29.4.3	wt eyes	0	41	1
	29.4.3	2018-07-08	ISO1-UC	HISR29.4.3	cn eyes	0	64	1
	29.4.3	2018-07-11	ISO1-UC	HISR29.4.3	cn eyes	0	51	1
	29.4.3		ISO1-UC	HISR29.4.3	wt eyes	0	156	1		156
	43.2.2	2018-05-11	ISO1-UC	HISR43.2.2	cn eyes	0	34	1
	43.2.2	2018-06-27	ISO1-UC	HISR43.2.2	cn eyes	0	44	1
	43.2.2	2018-07-02	ISO1-UC	HISR43.2.2	cn eyes	0	9	1	Omit because too few F1
	43.2.2	2018-08-07	ISO1-UC	HISR43.2.2	cn eyes	0	40	1
	43.2.2	2018-08-13	ISO1-UC	HISR43.2.3	cn eyes	0	49	1
	43.2.2		ISO1-UC	HISR43.2.2	cn eyes	0	167	1		167
	46.7.1	2018-05-02	ISO1-UC	HISR46.7.1	cn eyes	1	30	0.967742
	46.7.1	2018-06-28	ISO1-UC	HISR46.7.1	cn eyes	0	33	1
	46.7.1	2018-07-03	ISO1-UC	HISR46.7.1	cn eyes	0	29	1
	46.7.1	2018-07-17	ISO1-UC	HISR46.7.1	cn eyes	0	27	1
	46.7.1		ISO1-UC	HISR46.7.1	cn eyes	1	119	0.991667		120
	51.4.6	2018-06-10	ISO1-UC	HISR51.4.6	cn eyes	0	68	1
	51.4.6	2018-06-27	ISO1-UC	HISR51.4.6	cn eyes	0	46	1
	51.4.6		ISO1-UC	HISR51.4.6	cn eyes	0	114	1		114
			2nd round of sublines established from sibling pair mating
	VIAL ID	Date	Female in cross	Male in cross	Phenotypic marker	F1 female with >2 eggs (fertile)	Dysgenic F1 females	% Dysgenic females	Notes	Total F1 assayed
	10.3.3	2018-08-20	ISO1-UC	HISR10.3	cn eyes	13	17	0.566667
	10.3.3	2018-09-24	ISO1-UC	HISR10.3	cn eyes	11	16	0.592593
	10.3.3	2018-10-14	ISO1-UC	HISR10.4	cn eyes	9	12	0.571429
	10.3.3	2018-10-30	ISO1-UC	HISR10.3	cn eyes	14	14	0.5
	10.3.3	7/13 to 7/18	ISO1-UC	HISR10.3	cn eyes	47	59	0.556604		106
	17.4.1	2018-08-20	ISO1-UC	HISR17.4	cn eyes	24	8	0.25
	17.4.1	2018-09-14	ISO1-UC	HISR17.4	cn eyes	24	8	0.25
	17.4.1	2018-10-14	ISO1-UC	HISR17.5	cn eyes	7	5	0.416667
	17.4.1		ISO1-UC	HISR17.4	cn eyes
	17.4.1		ISO1-UC	HISR17.4	cn eyes	55	21	0.276316		76
	25.4	2018-09-14	ISO1-UC	HISR25.4	cn eyes	31	16	0.340426
	25.4	2018-10-14	ISO1-UC	HISR25.4	cn eyes	8	2	0.2
	25.4	2018-10-30	ISO1-UC	HISR25.4	cn eyes	25	5	0.166667
	25.4.1		ISO1-UC	HISR25.4	cn eyes	64	23	0.264368		87
	31.4	2018-08-20	ISO1-UC	HISR31.4	cn eyes	18	6	0.25
	31.4	2018-09-14	ISO1-UC	HISR31.4	cn eyes	21	8	0.275862
	31.4	2018-09-24	ISO1-UC	HISR31.4	cn eyes	36	4	0.1
	31.4	2018-10-30	ISO1-UC	HISR31.4	cn eyes	13	4	0.235294
	31.4.1	7/17 to 9/24	ISO1-UC	HISR31.4	cn eyes	88	22	0.2		110

## Sheet: Fig2D
																ISO1	Harwich	HISRN10	HISRN17	HISRN25	HISRN31	HISRD29	HISRD43	HISRD46	HISRD51	pi[2]	Birm
	ISO1	0.0226524													5 reads threshold	0.0226524	0.937585	0.175155	0.0448229	0.0328139	0.0249016	0.509318	0.222106	0.155354	0.195598	0.726314	0.792261
	Harwich	0.937585
	HISR-D29	0.509318														0.038477	0.957225	0.198771	0.0597237	0.0463089	0.0388385	0.540967	0.24749	0.177886	0.235481				0.95	0.95
	HISR-D43	0.222106
	HISR-D46	0.155354
	HISR-D51	0.195598
	HISR-N10	0.175155
	HISR-N17	0.0448229
	HISR-N25	0.0328139
	HISR-N31	0.0249016
	pi[2]	0.726314
	Birm	0.792261

## Sheet: Fig2E
Gene		ISO1-UC	Harwich	HISR_D29	HISR_D43	HISR_D46	HISR_D51	HISR_N10	HISR_N17	HISR_N25	HISR_N31	pi[2]	Birm				Gene		ISO1-UC	Harwich	HISR_D29	HISR_D43	HISR_D46	HISR_D51	HISR_N10	HISR_N17	HISR_N25	HISR_N31	pi[2]	Birm				Gene		ISO1-UC	Harwich	HISR_D29	HISR_D43	HISR_D46	HISR_D51	HISR_N10	HISR_N17	HISR_N25	HISR_N31		pi[2]	Birm
P-Element_DM		0.14	2401.28	807.05	601.14	326.7	344.1	292.99	87.22	51.48	161.26	674.05	179.78				PLACW_DM		0.14	2401.28	807.05	601.14	326.7	344.1	292.99	87.22	51.48	161.26	674.05	179.78				P-Element_DM		0.14	2401.28	807.05	601.14	326.7	344.1	292.99	87.22	51.48	161.26		674.05	179.78
R1_DM		15145.5	12037.1	16394.7	17124.7	14774.9	18777.9	11343	12393.4	12902.1	12351.2	8567.43	13728.1		>3000																			R1_DM		15145.5	12037.1	16394.7	17124.7	14774.9	18777.9	11343	12393.4	12902.1	12351.2		8567.43	13728.1
ROO		10082.9	11876.5	10142.8	11478.7	11408	8298.56	11964.3	12286.4	11917.6	12058	11170.1	13356.1																					ROO		10082.9	11876.5	10142.8	11478.7	11408	8298.56	11964.3	12286.4	11917.6	12058		11170.1	13356.1
FW		5013.97	5955.61	5178.59	5124.54	5042.42	5190.21	4288.68	4657.86	4595	4504.72	5744.78	4805.86						ISO1-UC	Harwich	HISR_D29	HISR_D43	HISR_D46	HISR_D51	HISR_N10	HISR_N17	HISR_N25	HISR_N31	pi[2]	Birm				FW		5013.97	5955.61	5178.59	5124.54	5042.42	5190.21	4288.68	4657.86	4595	4504.72		5744.78	4805.86
DOC		4145.74	3063.57	4011.39	3794.12	4199.26	3946.86	3758.54	3950.6	4004.45	4040.36	5136.72	4158.48						5.83022e-05	1	0.336092	0.250341	0.136052	0.143299	0.122014	0.0363223	0.0214386	0.0671559	0.280704	0.0748684				DOC		4145.74	3063.57	4011.39	3794.12	4199.26	3946.86	3758.54	3950.6	4004.45	4040.36		5136.72	4158.48
NTS_DM		3187.9	3023.21	3054.1	4326.18	4206.67	3390.57	3974.01	4560.3	4556.89	4430.32	2855.39	3265.79																					NTS_DM		3187.9	3023.21	3054.1	4326.18	4206.67	3390.57	3974.01	4560.3	4556.89	4430.32		2855.39	3265.79
STALKER4		2944.93	2948.34	2896.57	3265.94	3214.53	2451.28	3113.75	3293.68	3167.17	3294.3	4106.53	3339.25																					STALKER4		2944.93	2948.34	2896.57	3265.94	3214.53	2451.28	3113.75	3293.68	3167.17	3294.3		4106.53	3339.25
DM412		1838.67	2875.35	1930.43	2056.43	1991.57	1735.85	2085.53	2179.86	2101.89	2210.61	2263.99	2929.43																					DM412		1838.67	2875.35	1930.43	2056.43	1991.57	1735.85	2085.53	2179.86	2101.89	2210.61		2263.99	2929.43
MAX		1478.8	2512.33	1974.74	1905.67	1467.78	1894.48	1183.4	1280.11	1269.4	1312.91	1389.9	1403.19																					MAX		1478.8	2512.33	1974.74	1905.67	1467.78	1894.48	1183.4	1280.11	1269.4	1312.91		1389.9	1403.19
Jockey		1166.35	2346.15	1443	1340.27	1313.06	1268.12	1142.95	1167.32	1118.04	1149.16	1470.77	2312.81																					Jockey		1166.35	2346.15	1443	1340.27	1313.06	1268.12	1142.95	1167.32	1118.04	1149.16		1470.77	2312.81
DMCR1A		1810.95	2085.52	1919.85	1998.72	2009.96	1725.93	1829.88	1964.38	1901.06	1907.25	2186.11	1970.96																					DMCR1A		1810.95	2085.52	1919.85	1998.72	2009.96	1725.93	1829.88	1964.38	1901.06	1907.25		2186.11	1970.96
DM297		2777.1	2065.15	2523.98	2908.92	3139.69	2130.68	3126.53	3247.89	3085.23	3187.51	2835.92	2609.37																					DM297		2777.1	2065.15	2523.98	2908.92	3139.69	2130.68	3126.53	3247.89	3085.23	3187.51		2835.92	2609.37
NOMAD		1922.27	1983.54	2127.74	2005.93	1851.78	2093.27	1822.47	1815.95	1822.7	1852.95	2406.08	2955.13																					NOMAD		1922.27	1983.54	2127.74	2005.93	1851.78	2093.27	1822.47	1815.95	1822.7	1852.95		2406.08	2955.13
DMRT1B		2221.68	1948.53	2261.02	2279.41	2029.33	2606	1656.7	1795.01	1865.95	1840.24	1974.47	2125.89																					DMRT1B		2221.68	1948.53	2261.02	2279.41	2029.33	2606	1656.7	1795.01	1865.95	1840.24		1974.47	2125.89
QUASIMODO		1637.03	1929.54	1710.3	1754.79	1896.87	1519.63	1797.69	1890.2	1861.23	1945.22	2535.54	2185.05																					QUASIMODO		1637.03	1929.54	1710.3	1754.79	1896.87	1519.63	1797.69	1890.2	1861.23	1945.22		2535.54	2185.05
BLOOD		1864.39	1914.15	1740.05	2119.79	1995.88	1577.52	2077.27	2094.5	2040.19	2045.83	2112.31	2072.79																					BLOOD		1864.39	1914.15	1740.05	2119.79	1995.88	1577.52	2077.27	2094.5	2040.19	2045.83		2112.31	2072.79
ARS406_DM		1380.81	1830.58	1596.89	1818.03	1739.46	1219.21	1580.38	1679.28	1586.91	1685.25	1834.04	1792.96																					ARS406_DM		1380.81	1830.58	1596.89	1818.03	1739.46	1219.21	1580.38	1679.28	1586.91	1685.25		1834.04	1792.96
BEL		874.32	1764.24	1135.48	978.88	882.39	1063.77	686.37	778.62	784.09	778.71	1678.62	963.88																					BEL		874.32	1764.24	1135.48	978.88	882.39	1063.77	686.37	778.62	784.09	778.71		1678.62	963.88
MDG1		1657.09	1707.15	1500.15	2151.16	1718.3	1344.67	1860.17	1912.1	1845.15	1932.51	2207.42	1949.24																					MDG1		1657.09	1707.15	1500.15	2151.16	1718.3	1344.67	1860.17	1912.1	1845.15	1932.51		2207.42	1949.24
DM176		2000.13	1671.68	1934.46	2181.21	2200.05	1626.04	2073.67	2280.7	2167.73	2282.43	2687.97	2931.4																					DM176		2000.13	1671.68	1934.46	2181.21	2200.05	1626.04	2073.67	2280.7	2167.73	2282.43		2687.97	2931.4
R2_DM		1640.4	1620.36	1786.13	1789.8	1706.05	1828.74	1378.26	1519.03	1537.93	1528.81	1406.96	809.41																					R2_DM		1640.4	1620.36	1786.13	1789.8	1706.05	1828.74	1378.26	1519.03	1537.93	1528.81		1406.96	809.41
COPIA		1963.1	1503.11	1759.97	2698.53	2368.81	1987.02	2316.6	2569.27	2439.2	2559.15	2314.88	1934.9																					COPIA		1963.1	1503.11	1759.97	2698.53	2368.81	1987.02	2316.6	2569.27	2439.2	2559.15		2314.88	1934.9
SAT1.688_353		1141.28	1498.14	1286.07	1504.39	1392.5	1033.91	1245.74	1367.52	1280.98	1312.39	1531.08	1340.63																					SAT1.688_353		1141.28	1498.14	1286.07	1504.39	1392.5	1033.91	1245.74	1367.52	1280.98	1312.39		1531.08	1340.63
TAHRE		410.08	1432.93	503.75	442.45	464.17	444.96	405.88	402.77	394.65	425.01	2463.63	471.62																					TAHRE		410.08	1432.93	503.75	442.45	464.17	444.96	405.88	402.77	394.65	425.01		2463.63	471.62
I_DM		815.87	1347.89	1083.54	622.04	890.85	674.12	870.71	881.64	856.8	879.4	943.53	919.13																					I_DM		815.87	1347.89	1083.54	622.04	890.85	674.12	870.71	881.64	856.8	879.4		943.53	919.13
GYPSY4		1228.46	1281.93	1279.08	1283.54	1305.04	1140.92	1162.64	1242.15	1231.93	1228.8	1196.06	1274.81																					GYPSY4		1228.46	1281.93	1279.08	1283.54	1305.04	1140.92	1162.64	1242.15	1231.93	1228.8		1196.06	1274.81
BLASTOPIA		1004.76	1195.56	1035.79	1013.24	992.75	925.84	961.64	940.73	913.78	982.92	1131.39	1013.23																					BLASTOPIA		1004.76	1195.56	1035.79	1013.24	992.75	925.84	961.64	940.73	913.78	982.92		1131.39	1013.23
STALKER2		606.99	1157.99	736.72	1021.97	649.25	578.73	689.2	718.31	704.87	685.15	778.35	1011.57																					STALKER2		606.99	1157.99	736.72	1021.97	649.25	578.73	689.2	718.31	704.87	685.15		778.35	1011.57
HMSBEAGLE_I		1878.86	1022.98	1798.23	1835.1	1901.83	1776.57	1744.95	1900.41	1792.31	1864.29	1567.95	1452																					HMSBEAGLE_I		1878.86	1022.98	1798.23	1835.1	1901.83	1776.57	1744.95	1900.41	1792.31	1864.29		1567.95	1452
IDEFIX		1017.29	1017.29	984.25	1087.51	1081.75	744.74	1107.15	1171.43	1152.29	1214.2	1466.23	1234.74																					IDEFIX		1017.29	1017.29	984.25	1087.51	1081.75	744.74	1107.15	1171.43	1152.29	1214.2		1466.23	1234.74
DIVER		1169.93	1009.51	1085.71	1103.3	1107.02	1239.11	932.77	1073.49	1052.55	1066.69	1218.23	837.86																					DIVER		1169.93	1009.51	1085.71	1103.3	1107.02	1239.11	932.77	1073.49	1052.55	1066.69		1218.23	837.86
DOC2_DM		839.36	994.99	877.92	802.61	837.34	846.36	732.34	779.65	761.57	776.65	906.19	925.23																					DOC2_DM		839.36	994.99	877.92	802.61	837.34	846.36	732.34	779.65	761.57	776.65		906.19	925.23
MDG3_DM		657.42	992.11	731.41	705.43	674.92	517.91	692.73	704.06	686.14	727.33	866.33	800.95																					MDG3_DM		657.42	992.11	731.41	705.43	674.92	517.91	692.73	704.06	686.14	727.33		866.33	800.95
INVADER2		966.08	986.79	1005.74	976.22	1038.29	748.89	1048.27	1089.22	1056.27	1100.54	1266.19	1090.67																					INVADER2		966.08	986.79	1005.74	976.22	1038.29	748.89	1048.27	1089.22	1056.27	1100.54		1266.19	1090.67
TART		1177.74	958.98	793.77	653.91	716.47	775.53	927.97	920.89	918	974.67	1501.38	218.57																					TART		1177.74	958.98	793.77	653.91	716.47	775.53	927.97	920.89	918	974.67		1501.38	218.57
DMRT1A		1017.72	950.4	1064.36	1003.07	984.33	1224.43	725.2	826.99	871.17	851.39	1200.94	920.21																					DMRT1A		1017.72	950.4	1064.36	1003.07	984.33	1224.43	725.2	826.99	871.17	851.39		1200.94	920.21
BAGGINS1		948.6	939.53	944.56	1013.74	938.34	972.92	825.81	883.57	913.64	883.18	876.79	887.28																					BAGGINS1		948.6	939.53	944.56	1013.74	938.34	972.92	825.81	883.57	913.64	883.18		876.79	887.28
BATUMI		1170.36	937.9	1133.56	1159.93	1063.52	1247.97	881.23	931.87	959.04	1019.95	1504.66	984.4																					BATUMI		1170.36	937.9	1133.56	1159.93	1063.52	1247.97	881.23	931.87	959.04	1019.95		1504.66	984.4
BURDOCK		827.26	914.98	776.21	939.74	865.13	673.27	884.76	928.59	907.27	879.65	793.11	667.43																					BURDOCK		827.26	914.98	776.21	939.74	865.13	673.27	884.76	928.59	907.27	879.65		793.11	667.43
TRANSPAC		564.37	892.06	771	731.33	744.35	571.86	718.22	755.31	724.75	696.49	1379.05	1468.04																					TRANSPAC		564.37	892.06	771	731.33	744.35	571.86	718.22	755.31	724.75	696.49		1379.05	1468.04
TABOR		659.21	861.65	717.79	826.29	698.28	524.27	649.66	709.58	692.07	729.57	1053.11	834.57																					TABOR		659.21	861.65	717.79	826.29	698.28	524.27	649.66	709.58	692.07	729.57		1053.11	834.57
TIRANT		1432.6	809.66	1061.02	1212.68	1510.31	1336.36	1405.08	1478.37	1491.03	1478.89	494.97	43.44																					TIRANT		1432.6	809.66	1061.02	1212.68	1510.31	1336.36	1405.08	1478.37	1491.03	1478.89		494.97	43.44
CIRCE		859.78	790.16	898.52	1024.57	891.42	850.05	765.66	838.93	816.19	822.87	1198.88	929.33																					CIRCE		859.78	790.16	898.52	1024.57	891.42	850.05	765.66	838.93	816.19	822.87		1198.88	929.33
GYPSY6		639.87	781.05	736.62	647.63	689.45	748.77	561.77	595.83	578.04	601.04	783.69	697.69																					GYPSY6		639.87	781.05	736.62	647.63	689.45	748.77	561.77	595.83	578.04	601.04		783.69	697.69
IVK_DM		629.49	777.62	689.11	589.59	681.23	628.01	599.4	636.3	616.07	603.7	754.68	870.13																					IVK_DM		629.49	777.62	689.11	589.59	681.23	628.01	599.4	636.3	616.07	603.7		754.68	870.13
BS2		755.77	726.79	810.79	787.6	737.15	904.72	638.65	647.54	667.84	677.5	796.84	798.44																					BS2		755.77	726.79	810.79	787.6	737.15	904.72	638.65	647.54	667.84	677.5		796.84	798.44
SAT_RspLR		282.51	725.46	482.85	385.76	449.19	447.12	272.66	294.03	294.99	301.21	1170.85	149.01																					SAT_RspLR		282.51	725.46	482.85	385.76	449.19	447.12	272.66	294.03	294.99	301.21		1170.85	149.01
COPIA2		874.75	706.3	903.15	883.25	883.93	878.55	811.76	832.96	835.64	875.79	829.69	585.12																					COPIA2		874.75	706.3	903.15	883.25	883.93	878.55	811.76	832.96	835.64	875.79		829.69	585.12
DOC3_DM		670.24	684.93	694.67	701.01	700.56	659.78	581.46	633.41	648.82	635.41	728.61	703.61																					DOC3_DM		670.24	684.93	694.67	701.01	700.56	659.78	581.46	633.41	648.82	635.41		728.61	703.61
HETA		278.28	682.79	321.3	205.48	148.45	206	264.75	253.25	278.69	269.16	1033.98	315.65																					HETA		278.28	682.79	321.3	205.48	148.45	206	264.75	253.25	278.69	269.16		1033.98	315.65
Gypsy2		557.78	679.86	607.52	576.74	580.02	519.69	518.98	534.5	545.37	565.39	1184.12	793.14																					Gypsy2		557.78	679.86	607.52	576.74	580.02	519.69	518.98	534.5	545.37	565.39		1184.12	793.14
MICROPIA		624.33	666.69	661.08	643.72	650.79	632.17	525.76	578.62	568.89	609.72	898.84	760.95																					MICROPIA		624.33	666.69	661.08	643.72	650.79	632.17	525.76	578.62	568.89	609.72		898.84	760.95
Copia1		636.58	660.71	644.85	691.71	651.93	613.76	527.03	594.36	594.05	595.89	723.04	609.93																					Copia1		636.58	660.71	644.85	691.71	651.93	613.76	527.03	594.36	594.05	595.89		723.04	609.93
PROTOP_A		599.83	660.58	605.31	660.67	718.39	555.78	771.8	781.9	744.12	780.34	936.98	736.53																					PROTOP_A		599.83	660.58	605.31	660.67	718.39	555.78	771.8	781.9	744.12	780.34		936.98	736.53
ACCORD		592.81	655.06	647.26	596.23	655.76	548.96	575.32	617.48	604.35	617.02	668.47	669.56																					ACCORD		592.81	655.06	647.26	596.23	655.76	548.96	575.32	617.48	604.35	617.02		668.47	669.56
ROVER_DM		698.68	651.67	708.1	603.35	735.84	500.27	696.33	754.99	767.79	765.22	1177.91	933.46																					ROVER_DM		698.68	651.67	708.1	603.35	735.84	500.27	696.33	754.99	767.79	765.22		1177.91	933.46
BS		483.07	630.72	516.98	530.39	501.04	497.04	438.71	474.12	489.6	475.44	477.97	523.83																					BS		483.07	630.72	516.98	530.39	501.04	497.04	438.71	474.12	489.6	475.44		477.97	523.83
QUASIMODO2		473.26	550.53	504.3	490.14	518.57	378.45	494.48	518.63	523.7	530.51	705.92	589.18																					QUASIMODO2		473.26	550.53	504.3	490.14	518.57	378.45	494.48	518.63	523.7	530.51		705.92	589.18
INVADER3		606.13	543.17	567.25	646.08	621.65	522.15	606.88	624.09	626.01	634.81	558.66	587.17																					INVADER3		606.13	543.17	567.25	646.08	621.65	522.15	606.88	624.09	626.01	634.81		558.66	587.17
DOC6_DM		459.44	520.08	442.87	537.57	512.8	375.78	534.44	535.33	530.42	543.14	763.18	373.08																					DOC6_DM		459.44	520.08	442.87	537.57	512.8	375.78	534.44	535.33	530.42	543.14		763.18	373.08
DM1731		806.05	514.27	768.79	814.18	762.01	837.2	633.64	691.27	717.88	766.94	930.95	581.95																					DM1731		806.05	514.27	768.79	814.18	762.01	837.2	633.64	691.27	717.88	766.94		930.95	581.95
BARI_DM		581.28	499.88	560.85	718.41	660.23	472.82	605.89	633.92	600.92	662.21	466.02	633.39																					BARI_DM		581.28	499.88	560.85	718.41	660.23	472.82	605.89	633.92	600.92	662.21		466.02	633.39
ROOA		476.34	492.31	495.59	520.19	517.72	433.55	482.98	504.82	491.67	512.29	513.86	507.56																					ROOA		476.34	492.31	495.59	520.19	517.72	433.55	482.98	504.82	491.67	512.29		513.86	507.56
PROTOP		394.18	451.65	423.59	460.06	484.96	357.08	506.98	528.72	498.32	519.34	682.37	502.54																					PROTOP		394.18	451.65	423.59	460.06	484.96	357.08	506.98	528.72	498.32	519.34		682.37	502.54
Bica		514.95	450.36	495.69	543.43	482.32	471.55	451.06	472.9	478.37	469.77	618.97	478.92																					Bica		514.95	450.36	495.69	543.43	482.32	471.55	451.06	472.9	478.37	469.77		618.97	478.92
DIVER2		487.23	446.13	471.74	479.5	451.55	512.95	396.28	410.35	421.18	419.94	481.64	402.76																					DIVER2		487.23	446.13	471.74	479.5	451.55	512.95	396.28	410.35	421.18	419.94		481.64	402.76
Chouto		365.82	438.65	412.18	391.35	388.51	397.58	319.18	341.62	336.53	337.89	426.79	438.46																					Chouto		365.82	438.65	412.18	391.35	388.51	397.58	319.18	341.62	336.53	337.89		426.79	438.46
GYPSY2		456.86	436.68	463.08	470.74	436.66	486.4	375.31	385.43	401.09	391.5	426.79	443.6																					GYPSY2		456.86	436.68	463.08	470.74	436.66	486.4	375.31	385.43	401.09	391.5		426.79	443.6
G2_DM		523.47	434	526.38	459.55	487.93	594.21	401.93	444.32	450.56	492.79	524.09	341.39																					G2_DM		523.47	434	526.38	459.55	487.93	594.21	401.93	444.32	450.56	492.79		524.09	341.39
INVADER1		519.25	433.67	561.1	554.46	539	551.84	477.4	495.38	499.68	487.38	717.81	619.24																					INVADER1		519.25	433.67	561.1	554.46	539	551.84	477.4	495.38	499.68	487.38		717.81	619.24
INVADER4		294.47	417.48	308.56	335.91	297.93	297.15	263.06	274.44	279.19	278.7	330.19	325.2																					INVADER4		294.47	417.48	308.56	335.91	297.93	297.15	263.06	274.44	279.19	278.7		330.19	325.2
HOBO		432	401.63	434.36	552.25	526.14	519.22	473.87	446.63	440.2	458.86	1869.42	62.99																					HOBO		432	401.63	434.36	552.25	526.14	519.22	473.87	446.63	440.2	458.86		1869.42	62.99
POGO		268.25	374.27	300.89	320.81	280.75	251.68	293.84	288.31	283.84	293.05	241.17	266.38																					POGO		268.25	374.27	300.89	320.81	280.75	251.68	293.84	288.31	283.84	293.05		241.17	266.38
G_DM		560.08	345.7	589.82	538.28	531.07	646.89	402.99	433.08	457.64	443.56	501.8	395.03																					G_DM		560.08	345.7	589.82	538.28	531.07	646.89	402.99	433.08	457.64	443.56		501.8	395.03
Chimpo		288.17	341.52	315.1	280.62	279.21	364.71	222.6	235.2	235.65	262.89	419.27	301.43																					Chimpo		288.17	341.52	315.1	280.62	279.21	364.71	222.6	235.2	235.65	262.89		419.27	301.43
ACCORD2		220.19	297.31	218.16	239.84	225.04	211.35	204.46	225.24	220.35	246.83	371.71	299.23																					ACCORD2		220.19	297.31	218.16	239.84	225.04	211.35	204.46	225.24	220.35	246.83		371.71	299.23
GYPSY3		270.91	277.48	267.54	290.16	264.68	269.62	236.65	239.89	255.88	252.07	222.84	238.82																					GYPSY3		270.91	277.48	267.54	290.16	264.68	269.62	236.65	239.89	255.88	252.07		222.84	238.82
G5_DM		312.74	269.33	296.56	324.55	308.3	320.9	255.71	280.03	284.69	290.9	289.18	250.5																					G5_DM		312.74	269.33	296.56	324.55	308.3	320.9	255.71	280.03	284.69	290.9		289.18	250.5
M4DM		147.92	269.24	172.03	163.08	200.59	163.84	186.38	190.95	187.46	176.64	264.83	330.14																					M4DM		147.92	269.24	172.03	163.08	200.59	163.84	186.38	190.95	187.46	176.64		264.83	330.14
GYPSY12		313.02	264.85	286.52	330.98	300.53	288.75	292.36	301.87	294.92	297.86	357.7	304.48																					GYPSY12		313.02	264.85	286.52	330.98	300.53	288.75	292.36	301.87	294.92	297.86		357.7	304.48
DOC5_DM		203.14	245.23	228.69	214.81	238.8	180.81	208.06	236.68	229.71	217.53	244.32	235.93																					DOC5_DM		203.14	245.23	228.69	214.81	238.8	180.81	208.06	236.68	229.71	217.53		244.32	235.93
GTWIN		264.6	235.99	220.77	339.62	205.1	184.58	232.56	267.63	273.76	247.26	364.53	140.82																					GTWIN		264.6	235.99	220.77	339.62	205.1	184.58	232.56	267.63	273.76	247.26		364.53	140.82
GYPSY		377.63	233.65	457.18	308.1	372.93	412.51	328.22	340.98	348.32	349.32	438.85	337.64																					GYPSY		377.63	233.65	457.18	308.1	372.93	412.51	328.22	340.98	348.32	349.32		438.85	337.64
G6_DM		286.38	229.47	319.03	260.23	295.57	361.66	202.69	245.15	263.39	253.18	259.03	603.59																					G6_DM		286.38	229.47	319.03	260.23	295.57	361.66	202.69	245.15	263.39	253.18		259.03	603.59
TRANSIB2		165.39	221.43	182.7	192	195.46	147.77	189.35	192.04	201.19	188.23	228.19	203.16																					TRANSIB2		165.39	221.43	182.7	192	195.46	147.77	189.35	192.04	201.19	188.23		228.19	203.16
G4_DM		163.03	208.89	174.98	198.99	188.58	151.08	185.96	195.12	183.6	194.08	215.32	197.82																					G4_DM		163.03	208.89	174.98	198.99	188.58	151.08	185.96	195.12	183.6	194.08		215.32	197.82
GYPSY5		109.09	180.95	121.03	135.03	127.78	112.65	125.24	130.96	121.61	124.92	142.67	198.29																					GYPSY5		109.09	180.95	121.03	135.03	127.78	112.65	125.24	130.96	121.61	124.92		142.67	198.29
GYPSY7		164.89	175.84	159.69	157.31	171.45	134.28	154.61	164.81	161.58	165.55	193.61	168.3																					GYPSY7		164.89	175.84	159.69	157.31	171.45	134.28	154.61	164.81	161.58	165.55		193.61	168.3
TC1_DM		140.4	170.15	143.07	147.95	152.61	136.49	142.97	148.81	141.92	145.62	163.97	166.1																					TC1_DM		140.4	170.15	143.07	147.95	152.61	136.49	142.97	148.81	141.92	145.62		163.97	166.1
ZAM		159.45	161.08	186.05	129.2	176.66	144.97	154.26	170.84	167.3	176.64	317.38	143.8																					ZAM		159.45	161.08	186.05	129.2	176.66	144.97	154.26	170.84	167.3	176.64		317.38	143.8
INVADER6		155.65	141.04	151.28	164.04	155.45	141.53	147.27	155.17	151.21	149.23	195.16	234.23																					INVADER6		155.65	141.04	151.28	164.04	155.45	141.53	147.27	155.17	151.21	149.23		195.16	234.23
SAT1.688_356		151.64	134.31	165.25	150.58	177.47	120.16	160.54	178.29	165.8	162.63	237.72	163.27																					SAT1.688_356		151.64	134.31	165.25	150.58	177.47	120.16	160.54	178.29	165.8	162.63		237.72	163.27
GYPSY10		115.04	127.78	120.89	123.07	119.72	110.02	109.5	117.41	117.04	112.89	133.13	132.44																					GYPSY10		115.04	127.78	120.89	123.07	119.72	110.02	109.5	117.41	117.04	112.89		133.13	132.44
SPRINGER_LTR		156.01	125.32	155.11	135.33	159.44	179.45	146.57	145.22	143.49	148.11	457.29	93.37																					SPRINGER_LTR		156.01	125.32	155.11	135.33	159.44	179.45	146.57	145.22	143.49	148.11		457.29	93.37
FB4_DM		99.57	120.84	91.72	114.61	110.65	79.06	121.36	125.56	114.89	113.4	163.63	273.41																					FB4_DM		99.57	120.84	91.72	114.61	110.65	79.06	121.36	125.56	114.89	113.4		163.63	273.41
ALUII_DM		92.76	115.61	97.92	104.21	121.47	92.67	149.95	147.27	128.83	140.29	39.97	54.72																					ALUII_DM		92.76	115.61	97.92	104.21	121.47	92.67	149.95	147.27	128.83	140.29		39.97	54.72
TC1-2_DM		87.03	112.98	100.62	112.07	109.06	81.05	113.38	117.6	111.32	115.04	142.32	119.99																					TC1-2_DM		87.03	112.98	100.62	112.07	109.06	81.05	113.38	117.6	111.32	115.04		142.32	119.99
TART_B1		154.15	109.34	81.64	63.54	82.08	85.72	110.91	109.38	110.67	135.14	210.67	417.09																					TART_B1		154.15	109.34	81.64	63.54	82.08	85.72	110.91	109.38	110.67	135.14		210.67	417.09
S_DM		91.69	105.36	90.84	100.23	91.48	76.6	86.49	90.24	91.51	90.29	131.35	105.58																					S_DM		91.69	105.36	90.84	100.23	91.48	76.6	86.49	90.24	91.51	90.29		131.35	105.58
DMSAT6		106.01	97.33	104.21	118.17	96	112.69	68.41	77.14	73.57	85.74	93.96	89.04																					DMSAT6		106.01	97.33	104.21	118.17	96	112.69	68.41	77.14	73.57	85.74		93.96	89.04
Transib5		70.91	96.58	80.07	83.25	92.95	68.5	84.01	90.82	83.94	88.15	104.47	92.36																					Transib5		70.91	96.58	80.07	83.25	92.95	68.5	84.01	90.82	83.94	88.15		104.47	92.36
Gypsy1		66.9	96.45	71.41	70.15	70.24	80.67	65.8	65.51	64.35	65.21	132.5	63.26																					Gypsy1		66.9	96.45	71.41	70.15	70.24	80.67	65.8	65.51	64.35	65.21		132.5	63.26
5S_DM		81.37	94.28	86.36	85.19	90.02	95.9	82.39	75.47	76.57	84.28	95.86	86.37																					5S_DM		81.37	94.28	86.36	85.19	90.02	95.9	82.39	75.47	76.57	84.28		95.86	86.37
PROTOP_B		81.87	92.98	84.93	95.53	96.77	73.84	106.11	104.24	101.59	109.02	130.78	118.29																					PROTOP_B		81.87	92.98	84.93	95.53	96.77	73.84	106.11	104.24	101.59	109.02		130.78	118.29
G5A_DM		92.62	86.42	89.9	92.13	91.93	92.5	81.61	88.5	90.16	90.55	88.68	84.36																					G5A_DM		92.62	86.42	89.9	92.13	91.93	92.5	81.61	88.5	90.16	90.55		88.68	84.36
POGON1		15.9	85.66	26.9	26.52	22.42	19.26	27.04	23.76	19.52	21.74	30.78	20.91																					POGON1		15.9	85.66	26.9	26.52	22.42	19.26	27.04	23.76	19.52	21.74		30.78	20.91
FW2_DM		78.72	73.78	70.18	77.24	77.77	65.06	72.72	71.68	80.86	76.81	80.01	78.1																					FW2_DM		78.72	73.78	70.18	77.24	77.77	65.06	72.72	71.68	80.86	76.81		80.01	78.1
GYPSY8		81.44	70.86	69.69	74.22	62.02	79.27	56.9	53.37	59.91	56.19	57.72	65.85																					GYPSY8		81.44	70.86	69.69	74.22	62.02	79.27	56.9	53.37	59.91	56.19		57.72	65.85
DMRT1C		73.42	69.73	70.33	74.16	64.34	84.11	56.83	63.2	58.05	56.87	50.94	51.59																					DMRT1C		73.42	69.73	70.33	74.16	64.34	84.11	56.83	63.2	58.05	56.87		50.94	51.59
BS3_DM		75.43	69.68	72.39	74.6	70.28	73.21	58.67	63.97	66.78	64	65.13	63.38																					BS3_DM		75.43	69.68	72.39	74.6	70.28	73.21	58.67	63.97	66.78	64		65.13	63.38
Transib1		47.13	68.85	50.11	59.32	56	41.01	56.69	57.68	55.27	56.36	66.39	64.88																					Transib1		47.13	68.85	50.11	59.32	56	41.01	56.69	57.68	55.27	56.36		66.39	64.88
TRANSIB3		55.66	68.43	54.89	64.83	63.12	50.56	67.85	67.05	65.06	64.78	78.23	73.23																					TRANSIB3		55.66	68.43	54.89	64.83	63.12	50.56	67.85	67.05	65.06	64.78		78.23	73.23
SAT1.688_260		115.97	65.54	84.69	126.6	118.54	58.87	150.94	147.72	138.92	148.89	127.45	48.15																					SAT1.688_260		115.97	65.54	84.69	126.6	118.54	58.87	150.94	147.72	138.92	148.89		127.45	48.15
DMLTR5		122.85	59.81	118.62	114.34	115.9	127.96	102.44	112.78	114.68	113.83	84.83	89.58																					DMLTR5		122.85	59.81	118.62	114.34	115.9	127.96	102.44	112.78	114.68	113.83		84.83	89.58
GYPSY6A_LTR		53.65	54.46	55.08	58.52	57.54	57.89	50.69	51.06	55.55	54.9	64.04	57.12																					GYPSY6A_LTR		53.65	54.46	55.08	58.52	57.54	57.89	50.69	51.06	55.55	54.9		64.04	57.12
FROGGER		56.37	53.96	44.11	65.33	50.5	41.61	49.98	53.76	53.98	55.41	59.9	57.31																					FROGGER		56.37	53.96	44.11	65.33	50.5	41.61	49.98	53.76	53.98	55.41		59.9	57.31
SAR2_DM		41.98	51.41	46.18	52.78	56.2	36.05	58.81	58.13	59.27	58.08	58.01	60.83																					SAR2_DM		41.98	51.41	46.18	52.78	56.2	36.05	58.81	58.13	59.27	58.08		58.01	60.83
HETRP_DM		110.31	51.11	70.62	52.36	78.7	83.38	108.02	87.99	111.1	100.09	118.95	14.07																					HETRP_DM		110.31	51.11	70.62	52.36	78.7	83.38	108.02	87.99	111.1	100.09		118.95	14.07
DOC4_DM		54.73	48.77	50.07	53.64	53.76	49.11	48.36	49.01	50.69	48.02	56.17	46.22																					DOC4_DM		54.73	48.77	50.07	53.64	53.76	49.11	48.36	49.01	50.69	48.02		56.17	46.22
GYPSY9		41.98	48.14	48.34	42.01	47.94	44.41	38.34	37.7	40.39	43.99	47.04	39.61																					GYPSY9		41.98	48.14	48.34	42.01	47.94	44.41	38.34	37.7	40.39	43.99		47.04	39.61
G3_DM		45.77	46.55	41.36	47.48	43.75	40.38	41.94	50.48	44.61	42.87	49.39	59.17																					G3_DM		45.77	46.55	41.36	47.48	43.75	40.38	41.94	50.48	44.61	42.87		49.39	59.17
STALKER3_LTR		55.58	46.55	59.9	61.06	55.51	57.26	44.62	53.69	52.33	52.66	40.03	39.88																					STALKER3_LTR		55.58	46.55	59.9	61.06	55.51	57.26	44.62	53.69	52.33	52.66		40.03	39.88
XDMR		30.44	44.84	30.84	34.03	34.22	24.47	41.16	40.01	39.68	37.8	33.6	40.92																					XDMR		30.44	44.84	30.84	34.03	34.22	24.47	41.16	40.01	39.68	37.8		33.6	40.92
JOCKEY2		40.54	42.04	39.64	42.58	39.11	35.88	37.49	41.11	40.18	38.75	30.38	35.05																					JOCKEY2		40.54	42.04	39.64	42.58	39.11	35.88	37.49	41.11	40.18	38.75		30.38	35.05
HELENA_RT		33.67	38.86	34.97	36.24	36.79	30.03	31.28	33.21	35.32	38.06	38.94	36.87																					HELENA_RT		33.67	38.86	34.97	36.24	36.79	30.03	31.28	33.21	35.32	38.06		38.94	36.87
FW3_DM		36.89	37.81	32.66	36.96	36.01	35.03	35.02	37.7	36.25	34.71	36.87	48.27																					FW3_DM		36.89	37.81	32.66	36.96	36.01	35.03	35.02	37.7	36.25	34.71		36.87	48.27
GYPSY11		26.72	35.89	30.79	33.85	31.7	26.42	32.05	39.5	33.82	35.83	53.76	35.17																					GYPSY11		26.72	35.89	30.79	33.85	31.7	26.42	32.05	39.5	33.82	35.83		53.76	35.17
DM412B_LTR		45.99	35.22	34.87	45.12	42.16	44.53	41.3	46.37	48.19	44.16	27.22	31.03																					DM412B_LTR		45.99	35.22	34.87	45.12	42.16	44.53	41.3	46.37	48.19	44.16		27.22	31.03
DNAREP1_DM		28.29	33.67	29.21	32.29	30.81	26.17	30.99	30.83	29.67	28.01	33.6	31.53																					DNAREP1_DM		28.29	33.67	29.21	32.29	30.81	26.17	30.99	30.83	29.67	28.01		33.6	31.53
S2_DM		33.52	32.71	36.15	37.11	40.08	31.68	35.37	39.95	36.25	40.46	40.66	35.48																					S2_DM		33.52	32.71	36.15	37.11	40.08	31.68	35.37	39.95	36.25	40.46		40.66	35.48
G7_DM		12.75	28.65	21	10.97	18.64	22.61	9.18	12.33	10.37	10.22	11.83	10.67																					G7_DM		12.75	28.65	21	10.97	18.64	22.61	9.18	12.33	10.37	10.22		11.83	10.67
LOOPER1_DM		21.63	28.07	25.03	25.98	25.84	20.15	25.91	24.86	29.38	24.91	31.76	28.64																					LOOPER1_DM		21.63	28.07	25.03	25.98	25.84	20.15	25.91	24.86	29.38	24.91		31.76	28.64
MARINER2_DM		25.5	27.44	29.36	29.36	26.74	27.95	24.99	27.36	26.52	28.44	31.65	31.92																					MARINER2_DM		25.5	27.44	29.36	29.36	26.74	27.95	24.99	27.36	26.52	28.44		31.65	31.92
DMHMR2		21.27	24.26	26.46	21.8	20.8	24.73	16.94	16.38	15.66	14.86	50.77	12.06																					DMHMR2		21.27	24.26	26.46	21.8	20.8	24.73	16.94	16.38	15.66	14.86		50.77	12.06
INVADER5		36.17	23.93	33.2	35.07	33.74	29.35	33.11	32.31	31.46	30.24	32.62	33.97																					INVADER5		36.17	23.93	33.2	35.07	33.74	29.35	33.11	32.31	31.46	30.24		32.62	33.97
Transib4		22.92	23.26	24.89	23.86	25.11	20.44	27.18	27.23	27.6	26.55	30.1	30.65																					Transib4		22.92	23.26	24.89	23.86	25.11	20.44	27.18	27.23	27.6	26.55		30.1	30.65
SAT1.688_3F		5.52	21.5	4.48	6.55	6.88	3.86	6.99	8.99	9.29	7.65	6.72	8.77																					SAT1.688_3F		5.52	21.5	4.48	6.55	6.88	3.86	6.99	8.99	9.29	7.65		6.72	8.77
R1-2_DM		24.28	21.33	21.98	24.94	22.02	26.17	19.56	18.82	19.73	18.3	21.42	19.75																					R1-2_DM		24.28	21.33	21.98	24.94	22.02	26.17	19.56	18.82	19.73	18.3		21.42	19.75
TLD2		11.17	15.1	11.8	13.43	14.28	8.74	14.19	14.52	15.8	15.98	22.28	21.33																					TLD2		11.17	15.1	11.8	13.43	14.28	8.74	14.19	14.52	15.8	15.98		22.28	21.33
DMTOM1_LTR		14.33	12.84	14.8	12.29	12.66	10.52	11.44	12.27	12.01	14.61	13.67	14.65																					DMTOM1_LTR		14.33	12.84	14.8	12.29	12.66	10.52	11.44	12.27	12.01	14.61		13.67	14.65
GYPSY12A_LTR		8.31	9.29	8.46	9.39	8.67	7.59	10.17	12.27	11.44	10.91	11.14	9.39																					GYPSY12A_LTR		8.31	9.29	8.46	9.39	8.67	7.59	10.17	12.27	11.44	10.91		11.14	9.39
BS4_DM		7.09	8.32	5.7	7.21	7.28	6.83	6.78	8.22	7.65	6.7	7.93	7.81																					BS4_DM		7.09	8.32	5.7	7.21	7.28	6.83	6.78	8.22	7.65	6.7		7.93	7.81
SAR_DM		4.08	6.94	4.52	5.65	5.41	5.73	6.21	7.26	5.08	5.58	7.41	13.41																					SAR_DM		4.08	6.94	4.52	5.65	5.41	5.73	6.21	7.26	5.08	5.58		7.41	13.41
DMHMR1		89.18	5.48	54.74	62.61	55.3	88.39	40.88	40.53	47.47	122.17	374.53	285.04																					DMHMR1		89.18	5.48	54.74	62.61	55.3	88.39	40.88	40.53	47.47	122.17		374.53	285.04
HELITRON1_DM		3.22	4.64	2.75	3.71	3.62	3.39	2.82	2.7	3	3.35	2.18	3.28																					HELITRON1_DM		3.22	4.64	2.75	3.71	3.62	3.39	2.82	2.7	3	3.35		2.18	3.28
DMRPR		4.23	4.14	4.72	5.38	5.37	5.26	3.81	5.07	3.93	5.07	3.39	4.1																					DMRPR		4.23	4.14	4.72	5.38	5.37	5.26	3.81	5.07	3.93	5.07		3.39	4.1
TLD1		0.93	1.46	1.38	1.85	1.38	1.27	1.55	1.67	1.57	1.29	1.49	1.16																					TLD1		0.93	1.46	1.38	1.85	1.38	1.27	1.55	1.67	1.57	1.29		1.49	1.16
PEN1		2.22	1.13	1.82	1.61	1.59	2.93	1.77	1.99	1.57	1.37	1.49	1.62																					PEN1		2.22	1.13	1.82	1.61	1.59	2.93	1.77	1.99	1.57	1.37		1.49	1.62
DMRP1		1.79	0.84	1.13	1.41	1.51	1.74	1.62	1.28	1.86	2.06	0.4	1																					DMRP1		1.79	0.84	1.13	1.41	1.51	1.74	1.62	1.28	1.86	2.06		0.4	1
FUSHI_DM		0.57	0.84	0.89	0.69	0.57	0.81	1.06	0.9	0.93	0.86	0.75	0.54																					FUSHI_DM		0.57	0.84	0.89	0.69	0.57	0.81	1.06	0.9	0.93	0.86		0.75	0.54
PEN2		0.72	0.84	0.59	1.02	0.49	1.23	0.78	0.64	0.29	0.6	0.29	0.77																					PEN2		0.72	0.84	0.59	1.02	0.49	1.23	0.78	0.64	0.29	0.6		0.29	0.77
PEN4		0.72	0.75	1.48	0.9	0.9	0.81	0.35	0.71	0.79	0.26	0.69	0.77																					PEN4		0.72	0.75	1.48	0.9	0.9	0.81	0.35	0.71	0.79	0.26		0.69	0.77
RSP		0.72	0.13	0.54	0.15	0.65	0.47	0.42	0.51	0.64	0.26	39.46	0.77																					RSP		0.72	0.13	0.54	0.15	0.65	0.47	0.42	0.51	0.64	0.26		39.46	0.77
Transib-N1_DM		0.64	0.08	0.54	0.51	0.9	0.42	0.78	0.77	0.36	0.43	0.34	0.93																					Transib-N1_DM		0.64	0.08	0.54	0.51	0.9	0.42	0.78	0.77	0.36	0.43		0.34	0.93
ALA_DM		0	0	0	0	0	0	0	0	0	0	0	0																					ALA_DM		0	0	0	0	0	0	0	0	0	0		0	0
FTZ_DM		0	0	0	0	0	0	0	0	0	0	0	0																					FTZ_DM		0	0	0	0	0	0	0	0	0	0		0	0
LTRMDG3_DM		0	0	0	0	0	0	0	0	0	0	0	0																					LTRMDG3_DM		0	0	0	0	0	0	0	0	0	0		0	0
TLD3		0	0	0	0	0	0	0	0	0	0	0	0																					TLD3		0	0	0	0	0	0	0	0	0	0		0	0
gene@AOX1_chr3R		40.47	35.6	38.66	40.28	38.46	45.98	34.38	37.38	38.54	31.01	34	36.94																					gene@AOX1_chr3R		40.47	35.6	38.66	40.28	38.46	45.98	34.38	37.38	38.54	31.01		34	36.94
gene@Act5C_chrX		20.92	17.48	18.44	21.65	19.29	22.44	18.14	17.86	17.09	18.04	13.27	18.78																					gene@Act5C_chrX		20.92	17.48	18.44	21.65	19.29	22.44	18.14	17.86	17.09	18.04		13.27	18.78
gene@Adar_chrX		16.9	19.99	18.98	20.81	17.09	18.7	16.17	17.28	17.09	18.73	14.82	17.31																					gene@Adar_chrX		16.9	19.99	18.98	20.81	17.09	18.7	16.17	17.28	17.09	18.73		14.82	17.31
gene@Ago1_chr2R		69.19	70.23	70.48	68.56	70.69	71.59	74.34	67.25	71.71	64.52	75.58	68.4																					gene@Ago1_chr2R		69.19	70.23	70.48	68.56	70.69	71.59	74.34	67.25	71.71	64.52		75.58	68.4
gene@Ago2_chr3L		31.59	30.2	32.02	33.16	29.95	31.98	31.84	25.75	25.74	25.26	26.65	31.26																					gene@Ago2_chr3L		31.59	30.2	32.02	33.16	29.95	31.98	31.84	25.75	25.74	25.26		26.65	31.26
gene@Ago3_chr3L		19.48	25.47	19.43	19.94	22.91	16.07	23.86	23.31	20.52	23.37	24.29	22.68																					gene@Ago3_chr3L		19.48	25.47	19.43	19.94	22.91	16.07	23.86	23.31	20.52	23.37		24.29	22.68
gene@Akt1_chr3R		25.79	26.1	23.41	25.75	23.16	26.76	24.92	25.95	25.6	28.18	29.92	27.09																					gene@Akt1_chr3R		25.79	26.1	23.41	25.75	23.16	26.76	24.92	25.95	25.6	28.18		29.92	27.09
gene@Apc_chr3R		88.03	76.63	83.66	81.78	83.71	96.66	73.21	74.89	73.21	78.61	74.78	74.35																					gene@Apc_chr3R		88.03	76.63	83.66	81.78	83.71	96.66	73.21	74.89	73.21	78.61		74.78	74.35
gene@Armi_chr3L		41.04	36.22	39.98	36.6	35.57	37.96	31.63	34.94	33.89	34.54	34.92	36.56																					gene@Armi_chr3L		41.04	36.22	39.98	36.6	35.57	37.96	31.63	34.94	33.89	34.54		34.92	36.56
gene@Bt_chr4		234.52	249.79	245.07	238.4	242.58	228.61	234.6	231.86	236.43	243.82	251.1	250.8																					gene@Bt_chr4		234.52	249.79	245.07	238.4	242.58	228.61	234.6	231.86	236.43	243.82		251.1	250.8
gene@CaMKII_chr4		20.56	24.01	22.08	25.89	26.94	20.1	29.16	30.25	23.74	28.52	31.19	29.29																					gene@CaMKII_chr4		20.56	24.01	22.08	25.89	26.94	20.1	29.16	30.25	23.74	28.52		31.19	29.29
gene@Cdc27_chr3L		33.88	34.17	38.26	32.98	31.09	39.06	29.65	27.3	35.32	27.92	32.39	32.23																					gene@Cdc27_chr3L		33.88	34.17	38.26	32.98	31.09	39.06	29.65	27.3	35.32	27.92		32.39	32.23
gene@Ced-12_chr2L		26.43	23.72	26.41	24.61	23.32	25.49	22.59	21.77	23.74	23.02	22.86	25.16																					gene@Ced-12_chr2L		26.43	23.72	26.41	24.61	23.32	25.49	22.59	21.77	23.74	23.02		22.86	25.16
gene@Cenp-C_chr3R		35.82	38.9	39.93	40.64	40.37	42.54	37.35	37.51	36.11	37.2	38.25	39.15																					gene@Cenp-C_chr3R		35.82	38.9	39.93	40.64	40.37	42.54	37.35	37.51	36.11	37.2		38.25	39.15
gene@Ci_chr4		41.83	43.92	45.74	48.23	43.14	38.72	49.14	43.48	46.4	42.53	47.9	47.92																					gene@Ci_chr4		41.83	43.92	45.74	48.23	43.14	38.72	49.14	43.48	46.4	42.53		47.9	47.92
gene@CstF-64_chr3R		12.03	12.42	14.66	14.38	13.1	15.95	11.79	8.73	9.87	10.31	12.35	12.17																					gene@CstF-64_chr3R		12.03	12.42	14.66	14.38	13.1	15.95	11.79	8.73	9.87	10.31		12.35	12.17
gene@DIP-beta_chrX		11.39	12.21	11.8	14.05	11.48	14.25	13.63	11.56	13.66	13.49	11.72	13.76																					gene@DIP-beta_chrX		11.39	12.21	11.8	14.05	11.48	14.25	13.63	11.56	13.66	13.49		11.72	13.76
gene@Dm_p53_chr3R		17.19	17.15	16.18	18.72	16.6	15.91	13.41	12.52	13.16	13.06	14.3	14.26																					gene@Dm_p53_chr3R		17.19	17.15	16.18	18.72	16.6	15.91	13.41	12.52	13.16	13.06		14.3	14.26
gene@DopEcR_chr3L		34.1	37.1	35.36	31.31	34.27	32.45	33.96	33.21	33.39	28.27	32.57	32.96																					gene@DopEcR_chr3L		34.1	37.1	35.36	31.31	34.27	32.45	33.96	33.21	33.39	28.27		32.57	32.96
gene@EcR_chr2R		71.63	74.41	73.57	77.53	70.28	67.44	73	75.15	69.28	76.46	77.82	76.17																					gene@EcR_chr2R		71.63	74.41	73.57	77.53	70.28	67.44	73	75.15	69.28	76.46		77.82	76.17
gene@Fak_chr2R		41.98	46.97	45.34	50.23	45.17	45.51	43.63	41.81	45.18	43.82	49.22	48.15																					gene@Fak_chr2R		41.98	46.97	45.34	50.23	45.17	45.51	43.63	41.81	45.18	43.82		49.22	48.15
gene@Fas3_chr2L		32.81	34.09	31.82	35.16	29.79	35.25	26.62	32.43	31.39	31.36	32.11	34.16																					gene@Fas3_chr2L		32.81	34.09	31.82	35.16	29.79	35.25	26.62	32.43	31.39	31.36		32.11	34.16
gene@Fis1_chr2R		2.79	3.26	3.1	2.48	3.62	2.33	3.04	2.95	3.29	2.75	3.73	3.09																					gene@Fis1_chr2R		2.79	3.26	3.1	2.48	3.62	2.33	3.04	2.95	3.29	2.75		3.73	3.09
gene@Foxo_chr3R		31.88	27.31	28.82	32.14	28.97	29.01	31.63	27.17	27.6	26.98	33.43	30.57																					gene@Foxo_chr3R		31.88	27.31	28.82	32.14	28.97	29.01	31.63	27.17	27.6	26.98		33.43	30.57
gene@His2Av_chr3R		5.09	4.81	6.89	6.88	5.37	4.84	5.37	4.3	6.65	6.1	7.35	7.77																					gene@His2Av_chr3R		5.09	4.81	6.89	6.88	5.37	4.84	5.37	4.3	6.65	6.1		7.35	7.77
gene@His3.3A_chr2L		8.02	5.52	7.62	6.61	7	7.76	6.14	6.62	6.51	5.76	6.09	6.34																					gene@His3.3A_chr2L		8.02	5.52	7.62	6.61	7	7.76	6.14	6.62	6.51	5.76		6.09	6.34
gene@HisRS_chrX		26.07	24.09	28.48	26.73	21.53	27.78	20.12	20.04	22.74	19.67	16.48	23.23																					gene@HisRS_chrX		26.07	24.09	28.48	26.73	21.53	27.78	20.12	20.04	22.74	19.67		16.48	23.23
gene@IntS3_chr2R		22.28	30.62	24.59	27.54	24.86	19.81	28.1	22.99	22.16	23.88	27.34	28.21																					gene@IntS3_chr2R		22.28	30.62	24.59	27.54	24.86	19.81	28.1	22.99	22.16	23.88		27.34	28.21
gene@Iris_chr2L		17.91	13.76	19.48	18.45	16.93	19.89	16.38	14.19	17.44	14.26	15.74	16.89																					gene@Iris_chr2L		17.91	13.76	19.48	18.45	16.93	19.89	16.38	14.19	17.44	14.26		15.74	16.89
gene@Jing_chr2R		64.32	67.64	70.77	74.57	69.83	76.85	59.73	60.82	66.13	62.72	66.11	69.41																					gene@Jing_chr2R		64.32	67.64	70.77	74.57	69.83	76.85	59.73	60.82	66.13	62.72		66.11	69.41
gene@Klc_chr3L		13.75	13.84	16.62	15.37	14.32	15.95	13.41	14.84	13.01	15.21	13.96	14.45																					gene@Klc_chr3L		13.75	13.84	16.62	15.37	14.32	15.95	13.41	14.84	13.01	15.21		13.96	14.45
gene@Lis-1_chr2R		25.43	27.1	24.93	26.25	25.88	26.21	25.84	26.46	25.95	25.86	28.83	30.65																					gene@Lis-1_chr2R		25.43	27.1	24.93	26.25	25.88	26.21	25.84	26.46	25.95	25.86		28.83	30.65
gene@Lsd-2_chrX		35.74	33.63	37.23	42.4	39.47	37.37	37.91	35.9	36.68	33.85	29.58	34.7																					gene@Lsd-2_chrX		35.74	33.63	37.23	42.4	39.47	37.37	37.91	35.9	36.68	33.85		29.58	34.7
gene@Lsp2_chr3L		24.57	20.87	25.67	23.74	25.15	27.53	22.73	20.55	21.16	23.45	19.58	21.91																					gene@Lsp2_chr3L		24.57	20.87	25.67	23.74	25.15	27.53	22.73	20.55	21.16	23.45		19.58	21.91
gene@LysD_chr3L		12.75	9.37	12.98	10.02	10.7	11.62	8.4	9.63	8.87	7.73	7.81	10.86																					gene@LysD_chr3L		12.75	9.37	12.98	10.02	10.7	11.62	8.4	9.63	8.87	7.73		7.81	10.86
gene@MEP-1_chr3L		42.41	36.68	43.67	42.13	39.88	45.42	35.44	30.64	35.68	29.81	35.26	37.68																					gene@MEP-1_chr3L		42.41	36.68	43.67	42.13	39.88	45.42	35.44	30.64	35.68	29.81		35.26	37.68
gene@MtnA_chr3R		6.73	6.27	5.41	6.19	5.66	6.49	4.52	5.59	5.58	6.44	5.51	5.99																					gene@MtnA_chr3R		6.73	6.27	5.41	6.19	5.66	6.49	4.52	5.59	5.58	6.44		5.51	5.99
gene@PNUTS_chr2L		25.79	23.47	23.26	22.19	22.02	24.6	16.31	17.47	21.73	18.56	21.82	24.62																					gene@PNUTS_chr2L		25.79	23.47	23.26	22.19	22.02	24.6	16.31	17.47	21.73	18.56		21.82	24.62
gene@Pex3_chr3L		14.76	14.22	16.62	13.96	13.35	15.52	11.51	14.13	12.73	11.43	13.61	13.41																					gene@Pex3_chr3L		14.76	14.22	16.62	13.96	13.35	15.52	11.51	14.13	12.73	11.43		13.61	13.41
gene@Piwi_chr2L		22.92	24.47	24.98	27.93	22.63	25.28	24.29	24.79	24.24	23.45	24.06	26.59																					gene@Piwi_chr2L		22.92	24.47	24.98	27.93	22.63	25.28	24.29	24.79	24.24	23.45		24.06	26.59
gene@Rab11_chr3R		14.97	13.76	13.48	14.26	14	17.01	13.13	11.69	13.58	15.12	15.97	15.23																					gene@Rab11_chr3R		14.97	13.76	13.48	14.26	14	17.01	13.13	11.69	13.58	15.12		15.97	15.23
gene@RhoGAPp190_chrX		62.03	62.74	62.26	58.97	64.83	67.23	61.49	62.43	64.13	66.84	52.84	63.22																					gene@RhoGAPp190_chrX		62.03	62.74	62.26	58.97	64.83	67.23	61.49	62.43	64.13	66.84		52.84	63.22
gene@RhoGEF3_chr3L		30.3	32.04	34.57	32.98	27.79	37.03	30.78	27.04	27.81	29.21	30.84	31.42																					gene@RhoGEF3_chr3L		30.3	32.04	34.57	32.98	27.79	37.03	30.78	27.04	27.81	29.21		30.84	31.42
gene@TBPH_chr2R		29.3	26.6	27.34	30.5	26.82	26.81	27.18	29.03	25.6	30.76	25.96	32.38																					gene@TBPH_chr2R		29.3	26.6	27.34	30.5	26.82	26.81	27.18	29.03	25.6	30.76		25.96	32.38
gene@Vps8_chr3L		35.89	34.34	39.79	35.52	35.65	38.55	35.09	33.46	35.75	34.45	30.9	36.91																					gene@Vps8_chr3L		35.89	34.34	39.79	35.52	35.65	38.55	35.09	33.46	35.75	34.45		30.9	36.91
gene@Wnt2_chr2R		16.98	20.87	19.82	18.99	17.95	21.21	14.97	17.47	16.87	17.18	16.48	19.01																					gene@Wnt2_chr2R		16.98	20.87	19.82	18.99	17.95	21.21	14.97	17.47	16.87	17.18		16.48	19.01
gene@Yippee_chrX		10.17	11.08	10.72	14.47	11.35	11.37	10.1	12.65	11.08	9.62	7.58	11.05																					gene@Yippee_chrX		10.17	11.08	10.72	14.47	11.35	11.37	10.1	12.65	11.08	9.62		7.58	11.05
gene@Zelda_chrX		71.99	65.96	65.8	74.87	64.91	76.73	57.4	60.95	64.7	57.22	52.49	69.14																					gene@Zelda_chrX		71.99	65.96	65.8	74.87	64.91	76.73	57.4	60.95	64.7	57.22		52.49	69.14
gene@aPKC_chr2R		16.55	14.51	16.57	17.91	14.98	19.17	14.12	15.74	11.58	17.96	16.25	14.3																					gene@aPKC_chr2R		16.55	14.51	16.57	17.91	14.98	19.17	14.12	15.74	11.58	17.96		16.25	14.3
gene@ago_chr3L		45.99	43.04	53.31	48.35	46.96	54.2	37.98	39.24	47.69	37.97	44.22	40.5																					gene@ago_chr3L		45.99	43.04	53.31	48.35	46.96	54.2	37.98	39.24	47.69	37.97		44.22	40.5
gene@alphaTub84B_chr3R		20.06	21.08	21.49	22.34	19.25	24.47	17.58	19.78	16.37	17.18	17.86	18.63																					gene@alphaTub84B_chr3R		20.06	21.08	21.49	22.34	19.25	24.47	17.58	19.78	16.37	17.18		17.86	18.63
gene@atms_chr3R		16.26	15.98	17.07	14.77	15.59	18.15	15.32	12.07	13.8	14.18	12.69	17.2																					gene@atms_chr3R		16.26	15.98	17.07	14.77	15.59	18.15	15.32	12.07	13.8	14.18		12.69	17.2
gene@chb_chr3L		27	24.47	27.84	25.45	22.38	27.87	21.6	19.27	21.16	21.65	20.33	23.34																					gene@chb_chr3L		27	24.47	27.84	25.45	22.38	27.87	21.6	19.27	21.16	21.65		20.33	23.34
gene@chd1_chr2L		66.33	60.48	62.95	61.15	53.84	66.46	47.44	51	54.12	49.14	52.32	55.96																					gene@chd1_chr2L		66.33	60.48	62.95	61.15	53.84	66.46	47.44	51	54.12	49.14		52.32	55.96
gene@chico_chr2L		27.15	30.37	30.93	31.52	28.41	30.28	30.5	30.76	26.45	27.15	29.92	30.03																					gene@chico_chr2L		27.15	30.37	30.93	31.52	28.41	30.28	30.5	30.76	26.45	27.15		29.92	30.03
gene@cnn_chr2R		16.4	15.94	18	15.94	15.18	15.1	13.27	12.85	16.16	13.06	14.53	13.56																					gene@cnn_chr2R		16.4	15.94	18	15.94	15.18	15.1	13.27	12.85	16.16	13.06		14.53	13.56
gene@dia_chr2L		14.9	15.14	16.87	16.95	17.13	15.14	18.36	16.38	16.16	15.46	15.74	15.46																					gene@dia_chr2L		14.9	15.14	16.87	16.95	17.13	15.14	18.36	16.38	16.16	15.46		15.74	15.46
gene@dome_chrX		50.28	46.39	52.82	54.84	46.76	59.8	41.09	40.72	44.26	37.2	34.86	45.91																					gene@dome_chrX		50.28	46.39	52.82	54.84	46.76	59.8	41.09	40.72	44.26	37.2		34.86	45.91
gene@dpn_chr2R		18.98	19.99	18.93	18.87	15.59	19.04	15.18	13.42	18.52	14.61	19.58	16.69																					gene@dpn_chr2R		18.98	19.99	18.93	18.87	15.59	19.04	15.18	13.42	18.52	14.61		19.58	16.69
gene@dre4_chr3L		32.81	30.95	32.56	31.87	32.43	37.62	23.72	27.3	29.38	24.91	28.43	29.06																					gene@dre4_chr3L		32.81	30.95	32.56	31.87	32.43	37.62	23.72	27.3	29.38	24.91		28.43	29.06
gene@eIF-4a_chr2L		13.32	12.8	12.79	14.56	13.23	13.91	12.57	12.01	9.94	14.18	14.24	15.69																					gene@eIF-4a_chr2L		13.32	12.8	12.79	14.56	13.23	13.91	12.57	12.01	9.94	14.18		14.24	15.69
gene@eIF2B-gamma_chr2R		12.39	12.92	11.21	12.92	10.87	13.23	11.72	13.42	11.22	12.29	13.27	13.8																					gene@eIF2B-gamma_chr2R		12.39	12.92	11.21	12.92	10.87	13.23	11.72	13.42	11.22	12.29		13.27	13.8
gene@eIF4G_chr4		46.49	49.77	51.44	54.06	52.9	46.82	54.93	53.57	47.69	54.21	49.8	56.27																					gene@eIF4G_chr4		46.49	49.77	51.44	54.06	52.9	46.82	54.93	53.57	47.69	54.21		49.8	56.27
gene@elav_chrX		84.24	97.25	88.97	100.35	90.87	80.37	102.93	97.37	96.52	99.92	83.34	101.44																					gene@elav_chrX		84.24	97.25	88.97	100.35	90.87	80.37	102.93	97.37	96.52	99.92		83.34	101.44
gene@fab1_chr2R		68.84	64.12	71.26	67.52	64.3	78.08	57.82	66.54	67.13	61.51	61.11	63.42																					gene@fab1_chr2R		68.84	64.12	71.26	67.52	64.3	78.08	57.82	66.54	67.13	61.51		61.11	63.42
gene@fas2_chrX		39.61	39.61	42.79	39.62	39.72	38.72	35.79	34.81	37.96	40.29	33.6	40.07																					gene@fas2_chrX		39.61	39.61	42.79	39.62	39.72	38.72	35.79	34.81	37.96	40.29		33.6	40.07
gene@fog_chrX		52.29	42.71	45.64	44.76	46.92	51.07	45.04	43.93	42.18	44.42	33.94	44.98																					gene@fog_chrX		52.29	42.71	45.64	44.76	46.92	51.07	45.04	43.93	42.18	44.42		33.94	44.98
gene@frtz_chr2L		35.31	37.77	36.59	38.21	34.31	46.32	27.68	33.01	31.6	28.61	29.98	29.76																					gene@frtz_chr2L		35.31	37.77	36.59	38.21	34.31	46.32	27.68	33.01	31.6	28.61		29.98	29.76
gene@fzy_chr2L		18.91	17.78	20.61	18.3	18.6	19.85	16.17	15.41	17.73	16.24	16.08	17.78																					gene@fzy_chr2L		18.91	17.78	20.61	18.3	18.6	19.85	16.17	15.41	17.73	16.24		16.08	17.78
gene@hec_chrX		17.19	26.73	15.15	19.32	17.13	16.92	16.52	14.58	14.87	15.38	13.73	17.66																					gene@hec_chrX		17.19	26.73	15.15	19.32	17.13	16.92	16.52	14.58	14.87	15.38		13.73	17.66
gene@hpo_chr2R		24.43	22.92	23.66	27.36	24.09	26.55	20.62	23.19	22.24	19.42	25.21	19.09																					gene@hpo_chr2R		24.43	22.92	23.66	27.36	24.09	26.55	20.62	23.19	22.24	19.42		25.21	19.09
gene@hsp60D_chr2L		21.27	19.07	20.66	20.45	18.48	21.25	17.72	15.29	15.73	15.98	18.09	19.21																					gene@hsp60D_chr2L		21.27	19.07	20.66	20.45	18.48	21.25	17.72	15.29	15.73	15.98		18.09	19.21
gene@kat-60L1_chr3R		20.84	21.54	22.92	20.87	20.84	23.28	18.29	17.08	19.16	19.85	19.99	22.57																					gene@kat-60L1_chr3R		20.84	21.54	22.92	20.87	20.84	23.28	18.29	17.08	19.16	19.85		19.99	22.57
gene@lectin-28C_chr2L		31.09	29.53	32.02	30.29	29.63	27.19	29.02	27.23	28.74	27.75	27.28	27.9																					gene@lectin-28C_chr2L		31.09	29.53	32.02	30.29	29.63	27.19	29.02	27.23	28.74	27.75		27.28	27.9
gene@lig4_chrX		28.87	28.57	28.03	29	26.33	31.73	25.7	26.2	27.03	25.52	21.31	27.67																					gene@lig4_chrX		28.87	28.57	28.03	29	26.33	31.73	25.7	26.2	27.03	25.52		21.31	27.67
gene@lin-28_chr3L		9.46	6.69	8.21	8.28	7.28	9.12	8.26	7.39	6.79	5.5	8.79	7.73																					gene@lin-28_chr3L		9.46	6.69	8.21	8.28	7.28	9.12	8.26	7.39	6.79	5.5		8.79	7.73
gene@mad1_chr2R		21.27	23.01	25.52	22.72	21.69	25.83	21.32	19.2	21.52	20.45	21.54	22.99																					gene@mad1_chr2R		21.27	23.01	25.52	22.72	21.69	25.83	21.32	19.2	21.52	20.45		21.54	22.99
gene@mei-41_chrX		84.02	80.14	87.59	86.06	78.58	94.28	69.82	70.71	71.21	69.07	59.1	76.05																					gene@mei-41_chrX		84.02	80.14	87.59	86.06	78.58	94.28	69.82	70.71	71.21	69.07		59.1	76.05
gene@mira_chr3R		30.73	28.07	37.43	37.56	30.85	34.91	28.73	26.08	29.6	26.8	25.56	29.41																					gene@mira_chr3R		30.73	28.07	37.43	37.56	30.85	34.91	28.73	26.08	29.6	26.8		25.56	29.41
gene@mud_chrX		72.06	73.66	73.82	75.74	68.86	76.13	66.93	68.27	65.28	59.11	48.01	68.56																					gene@mud_chrX		72.06	73.66	73.82	75.74	68.86	76.13	66.93	68.27	65.28	59.11		48.01	68.56
gene@mus301_chr3L		29.3	26.64	30.69	29.09	27.43	27.82	23.72	28.77	30.31	24.91	26.08	30.92																					gene@mus301_chr3L		29.3	26.64	30.69	29.09	27.43	27.82	23.72	28.77	30.31	24.91		26.08	30.92
gene@mus304_chr3L		24.14	24.89	25.38	31.28	23.64	27.99	21.6	22.42	21.66	23.71	22.69	25.54																					gene@mus304_chr3L		24.14	24.89	25.38	31.28	23.64	27.99	21.6	22.42	21.66	23.71		22.69	25.54
gene@nbs_chr3L		25	24.43	26.31	25.89	21.16	25.7	20.62	23.96	21.88	20.53	24.47	20.4																					gene@nbs_chr3L		25	24.43	26.31	25.89	21.16	25.7	20.62	23.96	21.88	20.53		24.47	20.4
gene@ncm_chr2L		41.55	40.78	39.54	40.4	36.87	39.02	34.1	35.32	36.11	37.29	35.44	37.83																					gene@ncm_chr2L		41.55	40.78	39.54	40.4	36.87	39.02	34.1	35.32	36.11	37.29		35.44	37.83
gene@nhe1_chr2L		23.06	22.8	21	20.09	21.98	21.72	20.47	22.86	19.45	20.96	19.93	23.19																					gene@nhe1_chr2L		23.06	22.8	21	20.09	21.98	21.72	20.47	22.86	19.45	20.96		19.93	23.19
gene@nudE_chr3L		21.99	21.42	21.54	21.95	20.96	19.98	20.05	21.52	18.52	16.41	19.3	23.42																					gene@nudE_chr3L		21.99	21.42	21.54	21.95	20.96	19.98	20.05	21.52	18.52	16.41		19.3	23.42
gene@ovo_chrX		50.71	51.41	53.26	56.87	49.4	61.29	47.44	45.92	44.97	43.13	42.04	48.54																					gene@ovo_chrX		50.71	51.41	53.26	56.87	49.4	61.29	47.44	45.92	44.97	43.13		42.04	48.54
gene@rab35_chrX		25.72	28.86	25.23	30.56	24.09	27.7	30.92	28.71	26.52	26.03	24.7	30.65																					gene@rab35_chrX		25.72	28.86	25.23	30.56	24.09	27.7	30.92	28.71	26.52	26.03		24.7	30.65
gene@ran_chrX		13.47	15.77	14.41	13.37	16.97	16.2	12.43	13.29	16.8	14.61	13.67	12.87																					gene@ran_chrX		13.47	15.77	14.41	13.37	16.97	16.2	12.43	13.29	16.8	14.61		13.67	12.87
gene@rtf1_chr2R		24.93	20.08	22.33	20.48	21.73	23.54	23.09	17.66	20.59	19.67	20.1	19.94																					gene@rtf1_chr2R		24.93	20.08	22.33	20.48	21.73	23.54	23.09	17.66	20.59	19.67		20.1	19.94
gene@shg_chr2R		72.42	63.33	65.61	65.51	59.94	71.68	63.68	52.34	63.92	57.22	59.85	62.1																					gene@shg_chr2R		72.42	63.33	65.61	65.51	59.94	71.68	63.68	52.34	63.92	57.22		59.85	62.1
gene@slbo_chr2R		26.65	22.92	27.1	22.43	23.73	27.78	20.69	21.77	22.52	24.23	23.95	23.88																					gene@slbo_chr2R		26.65	22.92	27.1	22.43	23.73	27.78	20.69	21.77	22.52	24.23		23.95	23.88
gene@soxN_chr2L		35.24	34.68	35.07	40.1	35.28	42.41	30.5	30.76	30.24	27.41	34.75	31.38																					gene@soxN_chr2L		35.24	34.68	35.07	40.1	35.28	42.41	30.5	30.76	30.24	27.41		34.75	31.38
gene@ssp5_chr3R		23.71	21.88	24.79	22.96	21.36	25.7	21.96	19.01	22.24	20.62	23.03	21.99																					gene@ssp5_chr3R		23.71	21.88	24.79	22.96	21.36	25.7	21.96	19.01	22.24	20.62		23.03	21.99
gene@stai_chr2L		14.83	14.97	12.69	16.83	14.49	14.68	15.32	16.57	18.23	14.43	17.29	13.8																					gene@stai_chr2L		14.83	14.97	12.69	16.83	14.49	14.68	15.32	16.57	18.23	14.43		17.29	13.8
gene@tj_chr2L		31.52	35.3	33.49	33.88	31.25	36.69	31.28	29.8	32.89	28.44	34.69	34.2																					gene@tj_chr2L		31.52	35.3	33.49	33.88	31.25	36.69	31.28	29.8	32.89	28.44		34.69	34.2
gene@unc-119_chrX		17.84	16.52	16.23	17.25	15.71	17.69	14.76	15.48	16.52	17.53	13.15	15.19																					gene@unc-119_chrX		17.84	16.52	16.23	17.25	15.71	17.69	14.76	15.48	16.52	17.53		13.15	15.19
gene@vib_chr3R		24.86	30.32	29.31	28.77	28.36	26.34	29.09	32.05	25.45	28.87	33.77	29.25																					gene@vib_chr3R		24.86	30.32	29.31	28.77	28.36	26.34	29.09	32.05	25.45	28.87		33.77	29.25
gene@vps53_chr2L		28.22	24.59	27.05	29.48	26.57	28.84	24.57	25.63	25.6	28.44	25.56	28.83																					gene@vps53_chr2L		28.22	24.59	27.05	29.48	26.57	28.84	24.57	25.63	25.6	28.44		25.56	28.83
gene@whd_chr2R		23.57	22.38	23.7	26.64	21.98	28.2	22.03	23.64	20.23	20.1	22.11	24.04																					gene@whd_chr2R		23.57	22.38	23.7	26.64	21.98	28.2	22.03	23.64	20.23	20.1		22.11	24.04
plasmid@pCNEPm3		0	0	0	0	0.08	0	0	0	0	0	0.11	0.08																					plasmid@pCNEPm3		0	0	0	0	0.08	0	0	0	0	0		0.11	0.08
plasmid@pGSH0		0	0	0	0	0	0	0	0	0	0	0	0																					plasmid@pGSH0		0	0	0	0	0	0	0	0	0	0		0	0
plasmid@pISO1		0	0	0	0	0	0	0	0	0	0	0	0																					plasmid@pISO1		0	0	0	0	0	0	0	0	0	0		0	0
plasmid@pUC19		0	0	0	0	0	0	0	0	0	0	0	0																					plasmid@pUC19		0	0	0	0	0	0	0	0	0	0		0	0
virus@American_nodavirus_RNA1		0	0	0	0	0	0	0	0	0	0	0	0																					virus@American_nodavirus_RNA1		0	0	0	0	0	0	0	0	0	0		0	0
virus@American_nodavirus_RNA2		0	0	0	0	0	0	0	0	0	0	0	0																					virus@American_nodavirus_RNA2		0	0	0	0	0	0	0	0	0	0		0	0
virus@Black_beetle_virus		0	0	0	0	0	0	0	0	0	0	0	0																					virus@Black_beetle_virus		0	0	0	0	0	0	0	0	0	0		0	0
virus@Black_beetle_virus_RNA2		0	0	0	0	0	0	0	0	0	0	0	0																					virus@Black_beetle_virus_RNA2		0	0	0	0	0	0	0	0	0	0		0	0
virus@C_virus		0	0	0	0	0	0	0	0	0	0	0	0																					virus@C_virus		0	0	0	0	0	0	0	0	0	0		0	0
virus@Cricket_virus		0	0	0	0	0	0	0	0	0	0	0	0																					virus@Cricket_virus		0	0	0	0	0	0	0	0	0	0		0	0
virus@Flock_house_virus		0	0	0	0	0	0	0	0	0	0	0	0																					virus@Flock_house_virus		0	0	0	0	0	0	0	0	0	0		0	0
virus@Flock_house_virus_RNA1		0	0	0	0	0	0	0	0	0	0	0	0																					virus@Flock_house_virus_RNA1		0	0	0	0	0	0	0	0	0	0		0	0
virus@Flock_house_virus_TNCL_RNA1		0	0	0	0	0	0	0	0	0	0	0	0																					virus@Flock_house_virus_TNCL_RNA1		0	0	0	0	0	0	0	0	0	0		0	0
virus@Flock_house_virus_TNCL_RNA2		0	0	0	0	0	0	0	0	0	0	0	0																					virus@Flock_house_virus_TNCL_RNA2		0	0	0	0	0	0	0	0	0	0		0	0
virus@Nora_virus		0	0	0	0	0	0	0	0	0	0	0	0																					virus@Nora_virus		0	0	0	0	0	0	0	0	0	0		0	0
virus@birnavirus_a		0	0	0	0	0	0	0	0	0	0	0	0																					virus@birnavirus_a		0	0	0	0	0	0	0	0	0	0		0	0
virus@birnavirus_b		0	0	0	0	0	0	0	0	0	0	0	0																					virus@birnavirus_b		0	0	0	0	0	0	0	0	0	0		0	0
virus@myonecrosis_virus		0	0	0	0	0	0	0	0	0	0	0	0																					virus@myonecrosis_virus		0	0	0	0	0	0	0	0	0	0		0	0
virus@tetravirus		0	0	0	0	0	0	0.07	0	0	0	0	0																					virus@tetravirus		0	0	0	0	0	0	0.07	0	0	0		0	0
virus@totivirus		0	0	0	0	0	0	0	0	0	0	0	0																					virus@totivirus		0	0	0	0	0	0	0	0	0	0		0	0
virus@x_virus_a		0	0	0	0	0	0	0	0	0	0	0	0																					virus@x_virus_a		0	0	0	0	0	0	0	0	0	0		0	0
virus@x_virus_b		0	0	0	0	0	0	0	0	0	0	0	0																					virus@x_virus_b		0	0	0	0	0	0	0	0	0	0		0	0

## Sheet: Fig2F
		1st Biological replicate										Sample	rp49_Ct1	rp49_Ct2	rp49_AvgCt	P-ele7a_Ct1	P-ele7a_Ct2	P-ele_AvgCt	dCT	ddCT	%
Strain	rp49_ct1	rp49_ct2	AvgCT_rp49	F7aR7a_Ct1	F7aR7a_Ct2	AvgCT_F7aR7a	dCT	ddCT	Total P%			Har_rep1	21.611	21.733	21.672	13.088	13.103	13.0955	8.5765	0	1	1
53 Harwich	20.004	19.841	19.9225	11.897	11.988	11.9425	7.98	0	1			Har_rep2	21.348	21.339	21.3435	12.822	13	12.911	8.4325	0	1	1
HISR 46.7.1 rep1	19.018	19.118	19.068	14.27	14.141	14.2055	4.8625	-3.1175	0.115223			Har_rep3	19	19.564	19.282	11.378	10.871	11.1245	8.1575	0	1	1
HISR 43.2.2 rep1	19.646	19.648	19.647	13.699	13.625	13.662	5.985	-1.995	0.250868			ISO1_rep1	20.619	20.657	20.638	25.74	25.532	25.636	-4.998	13.5745	8.19725e-05	8.19725e-05
		2nd Biological replicate SPS061418										ISO1_rep2	21.251	21.199	21.225	26.32	26.702	26.511	-5.286	13.7185	7.41857e-05	7.41857e-05
Strain	rp49_ct1	rp49_ct2	AvgCT_rp49	F7aR7a_Ct1	F7aR7a_Ct2	AvgCT_F7aR7a	dCT	ddCT	Total P%			ISO1_rep3	20.136	20.081	20.1085	27.291	27.512	27.4015	-7.293	15.4505	2.23324e-05	2.23324e-05
53 Harwich	20.779	20.521	20.65	12.324	12.318	12.321	-8.329	0	1			N-10_rep1	20.519	20.344	20.4315	14.57	14.989	14.7795	5.652	2.9245	0.131716	0.131716
HISR 29.4.3 rep 1	19.195	18.95	19.0725	12.239	12.291	12.265	-6.8075	1.5215	0.348324			N-10_rep2	21.034	21.013	21.0235	14.39	14.602	14.496	6.5275	1.905	0.267016	0.267016
HISR 43.2.2 rep 3	18.631	18.491	18.561	12.081	11.995	12.038	-6.523	1.806	0.285983			N-10_rep3	18.574	19.761	19.1675	14.192	14.28	14.236	4.9315	3.226	0.106875	0.106875
HISR 46.7.1 rep 2	19.631	19.648	19.6395	14.19	14.12	14.155	-5.4845	2.8445	0.139226			N-17_rep1	20.31	20.258	20.284	15.074	15.346	15.21	5.074	3.5025	0.0882353	0.0882353
HISR 51.4.6 rep 2	19.612	19.527	19.5695	13.326	13.282	13.304	-6.2655	2.0635	0.239235			N-17_rep2	19.833	19.889	19.861	14.33	14.625	14.4775	5.3835	3.049	0.120826	0.120826
		SPS071718 3rd biological replicate										N-17_rep3	20.378	20.286	20.332	15.262	15.725	15.4935	4.8385	3.319	0.100203	0.100203
Strain	rp49_ct1	rp49_ct2	AvgCT_rp49	F7aR7a_Ct1	F7aR7a_Ct2	AvgCT_F7aR7a	dCT	ddCT	Total P%			N-25_rep1	20.095	20.467	20.281	15.933	16.05	15.9915	4.2895	4.287	0.0512253	0.0512253
53 Harwich	19.278	18.624	18.951	9.473	9.538	9.5055	-9.4455	0	1			N-25_rep2	20.556	20.744	20.65	16.359	16.434	16.3965	4.2535	4.179	0.0552072	0.0552072
HISR 29.4.3 rep 2	20.182	19.325	19.7535	13	11.342	12.171	-7.5825	1.863	0.274904			N-25_rep3	20.654	20.797	20.7255	16.138	16.444	16.291	4.4345	3.723	0.0757295	0.0757295
HISR 51.4.6 rep 3	20.753	20.406	20.5795	13.183	13.134	13.1585	-7.421	2.0245	0.24579			N-31_rep1	20.75	20.813	20.7815	15	14.969	14.9845	5.797	2.7795	0.145642	0.145642
		SPS071718 3rd/4th replicate										N-31_rep2	19.761	19.658	19.7095	13.54	13.682	13.611	6.0985	2.334	0.198333	0.198333
Strain	rp49_ct1	rp49_ct2	AvgCT_rp49	F7aR7a_Ct1	F7aR7a_Ct2	AvgCT_F7aR7a	dCT	ddCT	Total P%			N-31_rep3	21.721	21.737	21.729	15.211	15.328	15.2695	6.4595	1.698	0.308213	0.308213
53 Harwich	19.412	19.247	19.3295	9.612	9.642	9.627	-9.7025	0	1
HISR 29.4.3 rep 3	20.182	19.325	19.7535	13	11.342	12.171	-7.5825	2.12	0.230047						rep1	rep2	rep3	Average	Stdev
HISR 51.4.6 rep 4	19.8	19.222	19.511	12.242	12.058	12.15	-7.361	2.3415	0.197305					HISR-N10	0.131716	0.267016	0.106875	0.168536	0.0703708
HISR 43.2.2 rep 3	20.257	18.951	19.604	11.459	11.449	11.454	-8.15	1.5525	0.340919					HISR-N17	0.0882353	0.120826	0.100203	0.103088	0.0134605
HISR 46.7.1 rep 3	20.381	20.135	20.258	13.334	12.939	13.1365	-7.1215	2.581	0.167125					HISR-N25	0.0512253	0.0552072	0.0757295	0.0607207	0.0107366
														HISR-N31	0.145642	0.198333	0.308213	0.217396	0.0677243
		SPS071918 4th replicate
Strain	rp49_ct1	rp49_ct2	AvgCT_rp49	F7aR7a_Ct1	F7aR7a_Ct2	AvgCT_F7aR7a	dCT	ddCT	Total P%
53 Harwich_4	19.6	19.336	19.468	11.508	11.435	11.4715	-7.9965	0	1
HISR 43.2.2 rep 4	19.483	19.675	19.579	13.209	13.284	13.2465	-6.3325	1.664	0.315563
HISR 46.7.1 rep 4	19.812	19.971	19.8915	14.262	14.252	14.257	-5.6345	2.362	0.194521
Strain	rep1	rep2	rep3	Avg Total P%	Stdev
ISO1	0	0	0	0	0
Harwich	1	1	1	1	0
HISR-D29	0.348	0.275	0.23	0.284333	0.0486233
HISR-D43	0.316	0.341	0.286	0.314333	0.0224846
HISR-D46	0.115223	0.139	0.167	0.140408	0.0211613
HISR-D51	0.148394	0.239	0.197	0.194798	0.0370227
HISR-N10	0.131716	0.267016	0.106875	0.168536	0.0703708
HISR-N17	0.0882353	0.120826	0.100203	0.103088	0.0134605
HISR-N25	0.0512253	0.0552072	0.0757295	0.0607207	0.0107366
HISR-N31	0.145642	0.198333	0.308213	0.217396	0.0677243
