# Supplementary material for: Har-P, a short P-element variant, weaponizes P-transposase to severely impair Drosophila development
Source: eLife. 2019 Dec 17;8:e49948. doi: 10.7554/eLife.49948 (PMC6917496; doi:10.7554/eLife.49948)
Supplement: Figure 3—figure supplement 1—source data 1. [file elife-49948-fig3-figsupp1-data1.xlsx]

## Sheet: Fig3S1B
VIAL ID	Date	Female in cross	Male in cross	F1 female with >2 eggs (fertile)	Dysgenic F1 females	% Dysgenic females	Avg % F1 dysgenesis	Notes
Control	2019-02-12	N10/Fm7a, Sp, Sb	Harwich	0	28	1	w/ B	rep 1
	2019-02-12	N10/Fm7a, Sp, Sb	Harwich	5	20	0.8	w/o B
