# Supplementary material for: Har-P, a short P-element variant, weaponizes P-transposase to severely impair Drosophila development
Source: eLife. 2019 Dec 17;8:e49948. doi: 10.7554/eLife.49948 (PMC6917496; doi:10.7554/eLife.49948)
Supplement: Figure 3—source data 1. [file elife-49948-fig3-data1.xlsx]

## Sheet: Fig3C
		(+)	(-)
	Har	126	258
	ISO1	0	0
	HISR-D29	193	447
	HISR-D43	92	286
	HISR-D46	93	314
	HISR-D51	89	205
	HISR-N10	94	211
	HISR-N17	1	0
	HISR-N25	0	0
	HISR-N31	1	1

## Sheet: Fig3D
	VIAL ID	Date	Female in cross	Male in cross	F1 female with >2 eggs (fertile)	Dysgenic F1 females	% Dysgenic females	Notes	Total F1 assayed
	Maternal repression of P-element by HISR-D lines	2018-10-15	HISR-D 2943	#53 Harwich	33	9	0.214286
		2018-10-19	HISR-D 2943	#53 Harwich	48	22	0.314286
		2018-10-22	HISR-D 2943	#53 Harwich	45	16	0.262295
			HISR-D 2943	#53 Harwich	126	47	0.263622		173
		2018-10-15	HISR-D 4322	#53 Harwich	42	26	0.382353
		2018-10-19	HISR-D 4322	#53 Harwich	31	14	0.311111
		2018-10-22	HISR-D 4322	#53 Harwich	7	6	0.461538
			HISR-D 4322	#53 Harwich	80	46	0.385001		126
		2018-10-15	HISR-D 4671	#53 Harwich	53	11	0.171875
		2018-10-19	HISR-D 4671	#53 Harwich	41	17	0.293103
			HISR-D 4671	#53 Harwich	94	28	0.232489		122
		2018-10-15	HISR-D 5146	#53 Harwich	86	28	0.245614
		2018-10-19	HISR-D 5146	#53 Harwich	30	12	0.285714
			HISR-D 5146	#53 Harwich	116	40	0.25641		156
	Maternal repression of P-element by HISR-N lines	2018-10-15	HISR-N 1033	#53 Harwich	70	15	0.176471
		2018-10-19	HISR-N 1033	#53 Harwich	19	6	0.24
		2019-06-07	HISR-N 1033	#53 Harwich	28	1	0.0344828
			HISR-N 1033	#53 Harwich	117	22	0.150318		139
		2018-10-15	HISR-N 1741	#53 Harwich	0	120	1
		2018-10-22	HISR-N 1741	#53 Harwich	0	9	1
			HISR-N 1741	#53 Harwich	0	129	1		129
		2018-10-15	HISR-N 2541	#53 Harwich	0	91	1
		2018-10-19	HISR-N 2541	#53 Harwich	0	22	1
		2019-06-07	HISR-N 2541	#53 Harwich	0	25	1
			HISR-N 2541	#53 Harwich	0	138	1		138
	Maternal repression of Harwich P-elements by wild type lines	2019-02-27	pi[2]	#53 Harwich	35	6	0.146341
		2019-04-08	pi[2]	#53 Harwich	51	2	0.0377358
		2019-04-16	pi[2]	#53 Harwich	48	2	0.04
			pi[2]	#53 Harwich	134	10	0.0746924		144
		2019-02-27	OreR-mod	#53 Harwich	10	63	0.863014
		2019-04-08	OreR-mod	#53 Harwich	12	42	0.777778
		2019-04-16	OreR-mod	#53 Harwich	6	63	0.913043
			OreR-mod	#53 Harwich	28	168	0.851278		196
		2019-04-22	OreR-TK	#53 Harwich	22	35	0.614035
		2019-04-23	OreR-TK	#53 Harwich	14	54	0.794118
			OreR-TK	#53 Harwich	36	89	0.704076		125
		2019-05-16	Birm2;TM6/Sb	#53 Harwich	3	32	0.914286
		2019-05-20	Birm2;TM6/Sb	#53 Harwich	2	24	0.923077
			Birm2;TM6/Sb	#53 Harwich	5	56	0.918681		61
	tester females x Harwich males	% Dysgenic females
	HISR-D 29	0.263622
	HISR-D 43	0.385001
	HISR-D 46	0.232489
	HISR-D 51	0.25641
	HISR-N 10	0.208235
	HISR-N 17	1
	HISR-N 25	1
	pi[2]	0.0746924
	OreR-mod	0.851278
	OreR-TK	0.704076
	Birm2;TM6/Sb	0.918681
			F1 ♀ GD rate

## Sheet: Fig3S1B
VIAL ID	Date	Female in cross	Male in cross	F1 female with >2 eggs (fertile)	Dysgenic F1 females	% Dysgenic females	Avg % F1 dysgenesis	Notes
Control	2019-02-12	N10/Fm7a, Sp, Sb	Harwich	0	28	1	w/ B	rep 1
	2019-02-12	N10/Fm7a, Sp, Sb	Harwich	5	20	0.8	w/o B
