# Supplementary material for: Har-P, a short P-element variant, weaponizes P-transposase to severely impair Drosophila development
Source: eLife. 2019 Dec 17;8:e49948. doi: 10.7554/eLife.49948 (PMC6917496; doi:10.7554/eLife.49948)
Supplement: Figure 4—source data 1. [file elife-49948-fig4-data1.xlsx]

## Sheet: Har_Lineage
	ChrX - 30	chrX_520001
		chrX_905001
		chrX_2295001			chrX_2295001	chrX_2295001
		chrX_3745001
		chrX_4660001
		chrX_6315001
		chrX_6320001
		chrX_6330001
		chrX_6755001
		chrX_6905001
		chrX_7605001
		chrX_7945001
		chrX_7995001				chrX_7995001
		chrX_8155001
		chrX_8890001					chrX_8890001			chrX_8890001
		chrX_10815001
		chrX_11555001
		chrX_11580001
		chrX_11805001		chrX_11805001
		chrX_15075001
		chrX_16585001
		chrX_18355001
		chrX_18530001
		chrX_19350001
		chrX_19640001
		chrX_19785001
		chrX_20330001
		chrX_20380001
		chrX_21080001
		chrX_22485001
	Chr4	chr4_500001
	Chr3R - 23	chr3R_3355001
		chr3R_4075001		chr3R_4075001
		chr3R_5400001		chr3R_5400001
		chr3R_5650001
		chr3R_5680001
		chr3R_6675001		chr3R_6675001
		chr3R_8120001		chr3R_8120001
		chr3R_8250001
		chr3R_8385001		chr3R_8385001
		chr3R_9550001		chr3R_9550001			chr3R_9550001
		chr3R_9585001		chr3R_9585001
		chr3R_10130001
		chr3R_11565001					chr3R_11565001
		chr3R_11755001
		chr3R_15665001		chr3R_15665001
		chr3R_18245001
		chr3R_23295001	chr3R_23295001
		chr3R_26535001	chr3R_26535001	chr3R_26535001
		chr3R_26535001	chr3R_26535001	chr3R_26535001
		chr3R_29135001	chr3R_29135001	chr3R_29135001
		chr3R_29770001		chr3R_29770001
		chr3R_30000001	chr3R_30000001	chr3R_30000001		chr3R_30000001
		chr3R_31605001
	Chr3L - 25	chr3L_40001	chr3L_40001
		chr3L_180001	chr3L_180001
		chr3L_745001	chr3L_745001							chr3L_745001
		chr3L_880001	chr3L_880001				chr3L_880001
		chr3L_1205001	chr3L_1205001
		chr3L_3070001	chr3L_3070001
		chr3L_4975001	chr3L_4975001
		chr3L_8075001	chr3L_8075001
		chr3L_8825001	chr3L_8825001
		chr3L_11215001
		chr3L_11680001
		chr3L_12275001
		chr3L_14175001
		chr3L_14205001
		chr3L_14595001
		chr3L_16745001
		chr3L_17655001
		chr3L_17740001
		chr3L_18420001
		chr3L_19235001
		chr3L_20195001
		chr3L_20620001	chr3L_20620001
		chr3L_22785001		chr3L_22785001
		chr3L_23155001
		chr3L_24025001		chr3L_24025001
	Chr2R - 26	chr2R_2115001
		chr2R_7620001
		chr2R_8665001	chr2R_8665001
		chr2R_8735001	chr2R_8735001
		chr2R_9115001	chr2R_9115001
		chr2R_10540001	chr2R_10540001
		chr2R_11105001	chr2R_11105001
		chr2R_11450001	chr2R_11450001
		chr2R_11500001
		chr2R_11615001	chr2R_11615001
		chr2R_12340001
		chr2R_12525001
		chr2R_12590001	chr2R_12590001
		chr2R_13620001	chr2R_13620001
		chr2R_14575001	chr2R_14575001
		chr2R_15125001	chr2R_15125001
		chr2R_16185001
		chr2R_16385001
		chr2R_16825001
		chr2R_17820001
		chr2R_19455001	chr2R_19455001		chr2R_19455001	chr2R_19455001
		chr2R_20695001	chr2R_20695001		chr2R_20695001	chr2R_20695001
		chr2R_21100001	chr2R_21100001		chr2R_21100001	chr2R_21100001
		chr2R_22265001	chr2R_22265001	chr2R_22265001	chr2R_22265001	chr2R_22265001	chr2R_22265001
		chr2R_24560001	chr2R_24560001	chr2R_24560001	chr2R_24560001	chr2R_24560001
		chr2R_24945001	chr2R_24945001	chr2R_24945001	chr2R_24945001	chr2R_24945001
	Chr2L - 22	chr2L_130001
		chr2L_220001
		chr2L_265001
		chr2L_420001
		chr2L_1320001
		chr2L_1735001
		chr2L_2755001
		chr2L_5940001	chr2L_5940001
		chr2L_6045001	chr2L_6045001
		chr2L_6410001	chr2L_6410001
		chr2L_7020001	chr2L_7020001
		chr2L_7820001	chr2L_7820001
		chr2L_8275001	chr2L_8275001
		chr2L_8695001	chr2L_8695001
		chr2L_10470001
		chr2L_12480001
		chr2L_12490001
		chr2L_13545001
		chr2L_13875001	chr2L_13875001
		chr2L_14490001	chr2L_14490001		chr2L_14490001	chr2L_14490001
		chr2L_15330001	chr2L_15330001						chr2L_15330001
		chr2L_20520001	chr2L_20520001		chr2L_20520001	chr2L_20520001
	▼P-element copy # ►	Har	HISR-D29	HISR-D43	HISR-D46	HISR-D51	HISR-N10	HISR-N17	HISR-N25	HISR-N31
		127	77	68	36	34	23	15	12	22

## Sheet: Overlaps
	▼P-element copy #►		127	77	68	36	34	23	15	12
			Har	HISR-D29	HISR-D43	HISR-D46	HISR-D51	HISR-N10	HISR-N17	HISR-N25
	77	HISR-D29	42
	68	HISR-D43	19	9
	36	HISR-D46	9	9	7
	34	HISR-D51	11	11	7	27
	23	HISR-N10	5	3	4	1	1
	15	HISR-N17	0	1	1	1	0	2
	12	HISR-N25	1	1	0	0	0	0	0
	22	HISR-N31	2	3	1	0	1	2	1	0

## Sheet: HISR_D46_Pele
	SV#	Chr	Chr_coord_5p	Chr_coord_3p	HISRD4671_Inserts_Annotated.TE	TE_coord_start	TE_coord_end	Reads_collapsed	Chr_Coord_Dist	Symmetry	avg_blat_score	Norm_RefGen_Reads	Coverage_Ratio	classification	comments	insert_code	loci_code	Sym_score	libname	Field0
1	6	chr2L	11808212	11808285	P-element	2885	2885	16	73	'7-9	49.65	4.7	2.8	intron	crol -	chr2L_16_11805001	chr2L_11805001	0.44	HISRD4671	P-element
2	9	chr2L	14490449	14490469	P-element	3	2864	5	20	'2-3	55.47	7.3	0.6	intergenic	noc +	chr2L_5_14490001	chr2L_14490001	0.4	HISRD4671	P-element
3	14	chr2L	17384084	17384144	P-element	2883	14	12	60	'8-4	48.67	4.7	2.1	5` UTR	Lrch -	chr2L_12_17380001	chr2L_17380001	0.67	HISRD4671	P-element
4	19	chr2L	20523285	20523337	P-element	1	25	6	52	'4-2	44.44	6	0.9	intergenic	not near genes	chr2L_6_20520001	chr2L_20520001	0.67	HISRD4671	P-element
5	20	chr2L	21135484	21135549	P-element	2882	2879	5	65	'3-2	53.87	4.4	0.9	intron	Dap160 -	chr2L_5_21135001	chr2L_21135001	0.6	HISRD4671	P-element
6	33	chr2R	9553431	9553482	P-element	2874	14	5	51	'2-3	46.77	6.9	0.6	5` UTR	CR43651 +	chr2R_5_9550001	chr2R_9550001	0.4	HISRD4671	P-element
7	34	chr2R	11371095	11371165	P-element	2882	2	24	70	'8-16	48.29	4.4	4.4	5` UTR	Tapdelta -	chr2R_24_11370001	chr2R_11370001	0.33	HISRD4671	P-element
8	35	chr2R	12981176	12981250	P-element	2	2885	15	74	'6-9	47.72	3.7	3.2	intergenic	Psc -	chr2R_15_12980001	chr2R_12980001	0.4	HISRD4671	P-element
9	38	chr2R	15600420	15600449	P-element	32	3	10	29	'6-4	45.33	2.3	3	intergenic	not near genes	chr2R_10_15600001	chr2R_15600001	0.6	HISRD4671	P-element
10	39	chr2R	18357272	18357339	P-element	2885	9	15	67	'11-4	53.62	4.7	2.6	5` UTR	sbb -	chr2R_15_18355001	chr2R_18355001	0.73	HISRD4671	P-element
11	46	chr2R	19456998	19457069	P-element	5	2	7	71	'4-3	57.52	3.5	1.6	intron,intron	mei-W68 +,par-1 +	chr2R_7_19455001	chr2R_19455001	0.57	HISRD4671	P-element
12	52	chr2R	20698348	20698416	P-element	2	2885	10	68	'6-4	50.8	4.3	1.9	intergenic	dpr +	chr2R_10_20695001	chr2R_20695001	0.6	HISRD4671	P-element
13	57	chr2R	21101592	21101643	P-element	24	2884	8	51	'5-3	45.25	3	2	intergenic	CG34396 +,ktub +	chr2R_8_21100001	chr2R_21100001	0.62	HISRD4671	P-element
14	63	chr2R	22269348	22269409	P-element	2883	13	14	61	'5-9	47.33	5.5	2.2	intron	dve +	chr2R_14_22265001	chr2R_22265001	0.36	HISRD4671	P-element
15	72	chr2R	24561609	24561678	P-element	7	2	19	69	'9-10	49.57	3.6	4.1	5` UTR	CG11414 +	chr2R_19_24560001	chr2R_24560001	0.47	HISRD4671	P-element
16	75	chr2R	24949097	24949168	P-element	3	2883	16	71	'8-8	44.12	4.5	2.9	5` UTR	CG12851 +	chr2R_16_24945001	chr2R_24945001	0.5	HISRD4671	P-element
17	78	chr3L	6964329	6964387	P-element	2872	4	11	58	'6-5	46.36	5.4	1.7	intron	sgl -	chr3L_11_6960001	chr3L_6960001	0.55	HISRD4671	P-element
18	79	chr3L	7134447	7134493	P-element	6	2861	5	46	'4-1	56.8	3.9	1	intergenic	melt +	chr3L_5_7130001	chr3L_7130001	0.8	HISRD4671	P-element
19	81	chr3L	8240894	8240965	P-element	5	2885	17	71	'7-10	48.31	3.8	3.5	intron	Dscam4 +	chr3L_17_8240001	chr3L_8240001	0.41	HISRD4671	P-element
20	82	chr3L	9763468	9763542	P-element	2886	3	11	74	'5-6	48.97	3.7	2.3	intergenic	CG8177 +	chr3L_11_9760001	chr3L_9760001	0.45	HISRD4671	P-element
21	86	chr3L	21879265	21879333	P-element	9	2886	17	68	'9-8	52.36	3.3	4	intron	mub +	chr3L_17_21875001	chr3L_21875001	0.53	HISRD4671	P-element
22	88	chr3L	22834338	22834391	P-element	2761	2882	16	53	'7-9	43.94	2.6	4.4	intron	jim -	chr3L_16_22830001	chr3L_22830001	0.44	HISRD4671	P-element
23	92	chr3R	5624043	5624118	P-element	1	2	13	75	'4-9	52.72	4.9	2.2	5` UTR,5` UTR	Spec2 -,CG2911 -	chr3R_13_5620001	chr3R_5620001	0.31	HISRD4671	P-element
24	95	chr3R	16305672	16305741	P-element	5	4	14	69	'7-7	44.54	5.1	2.3	intergenic	Zip89B +	chr3R_14_16305001	chr3R_16305001	0.5	HISRD4671	P-element
25	101	chr3R	21829553	21829577	P-element	2857	6	4	24	'2-2	49	8	0.4	intergenic	not near genes	chr3R_4_21825001	chr3R_21825001	0.5	HISRD4671	P-element
26	102	chr3R	22133738	22133802	P-element	2882	2878	11	64	'4-7	46.66	5.9	1.6	intergenic	SKIP +,CG42390 +	chr3R_11_22130001	chr3R_22130001	0.36	HISRD4671	P-element
27	103	chr3R	22589196	22589246	P-element	2864	4	8	50	'1-7	51.4	6.2	1.1	intron	Efa6 +	chr3R_8_22585001	chr3R_22585001	0.12	HISRD4671	P-element
28	107	chr3R	24719985	24720054	P-element	2878	1	12	69	'9-3	46.15	5.1	2	intron	tok +	chr3R_12_24715001	chr3R_24715001	0.75	HISRD4671	P-element
29	110	chr3R	27608154	27608225	P-element	5	2885	14	71	'7-7	52.97	4.3	2.6	5` UTR	Tusp +	chr3R_14_27605001	chr3R_27605001	0.5	HISRD4671	P-element
30	111	chr3R	28327040	28327114	P-element	2885	2	20	74	'9-11	48.17	3.1	4.9	intron	larp -	chr3R_20_28325001	chr3R_28325001	0.45	HISRD4671	P-element
31	115	chr3R	31725684	31725752	P-element	5	2882	5	68	'3-2	57.98	7.1	0.6	intron	ttk +	chr3R_5_31725001	chr3R_31725001	0.6	HISRD4671	P-element
32	128	chrX	2297788	2297863	P-element	2886	2	18	75	'11-7	50.99	3.1	4.4	intron	phl +	chrX_18_2295001	chrX_2295001	0.61	HISRD4671	P-element
33	130	chrX	4075574	4075636	P-element	2885	2873	7	62	'5-2	50.48	4.8	1.2	intergenic	CG43689 +	chrX_7_4075001	chrX_4075001	0.71	HISRD4671	P-element
34	132	chrX	5679938	5680013	P-element	4	4	16	75	'10-6	46.87	4.9	2.7	5` UTR	Tre1 -	chrX_16_5675001	chrX_5675001	0.62	HISRD4671	P-element
35	135	chrX	8437135	8437179	P-element	2856	2884	11	44	'5-6	42.58	3.8	2.3	5` UTR,5` UTR	CG12125 -,CG1440 +	chrX_11_8435001	chrX_8435001	0.45	HISRD4671	P-element
36	136	chrX	9134986	9135048	P-element	2	14	13	62	'8-5	46.92	4.1	2.5	5` UTR	fend -	chrX_13_9130001	chrX_9130001	0.62	HISRD4671	P-element

## Sheet: HISR_D51_Pele
		SV#	Chr	Chr_coord_5p	Chr_coord_3p	HISRD5146_Inserts_Annotated.TE	TE_coord_start	TE_coord_end	Reads_collapsed	Chr_Coord_Dist	Symmetry	avg_blat_score	Norm_RefGen_Reads	Coverage_Ratio	classification	comments	insert_code	loci_code	Sym_score	libname	Field0
	1	8	chr2L	3124762	3124783	P-element	2854	2875	5	21	'3-2	40.8	5.8	0.7	exon	toc -	chr2L_5_3120001	chr2L_3120001	0.6	HISRD5146	P-element
	2	15	chr2L	11808213	11808271	P-element	3	2870	15	58	'8-7	45.42	4.4	2.8	intron	crol -	chr2L_15_11805001	chr2L_11805001	0.53	HISRD5146	P-element
	3	18	chr2L	14490450	14490523	P-element	4	2886	17	73	'9-8	45.21	5.9	2.5	intergenic	noc +	chr2L_17_14490001	chr2L_14490001	0.53	HISRD5146	P-element
	4	24	chr2L	17384081	17384105	P-element	1	2862	8	24	'5-3	58.93	8	0.9	5` UTR	Lrch -	chr2L_8_17380001	chr2L_17380001	0.62	HISRD5146	P-element
	5	40	chr2L	20523300	20523470	P-element	2871	48	11	170	'10-1	45.03	3.5	2.4	intergenic	not near genes	chr2L_11_20520001	chr2L_20520001	0.91	HISRD5146	P-element
	6	42	chr2L	21135501	21135704	P-element	2868	2760	6	203	'5-1	46.09	3.8	1.2	intron	Dap160 -	chr2L_6_21135001	chr2L_21135001	0.83	HISRD5146	P-element
	7	79	chr2R	11371090	11371469	P-element	2886	2864	20	379	'18-2	50.62	2.6	5.6	5` UTR	Tapdelta -	chr2R_20_11370001	chr2R_11370001	0.9	HISRD5146	P-element
	8	81	chr2R	12981182	12981227	P-element	8	2862	4	45	'3-1	47.46	5.7	0.6	intergenic	Psc -	chr2R_4_12980001	chr2R_12980001	0.75	HISRD5146	P-element
	9	92	chr2R	15600425	15600447	P-element	26	5	4	22	'2-2	53.13	10	0.4	intergenic	not near genes	chr2R_4_15600001	chr2R_15600001	0.5	HISRD5146	P-element
	10	98	chr2R	19456777	19457066	P-element	2691	2882	24	289	'1-23	53.46	2.9	6.2	5` UTR,5` UTR	mei-W68 +,par-1 +	chr2R_24_19455001	chr2R_19455001	0.04	HISRD5146	P-element
	11	104	chr2R	20698348	20698408	P-element	2	2877	14	60	'7-7	48.1	2.2	4.4	intergenic	dpr +	chr2R_14_20695001	chr2R_20695001	0.5	HISRD5146	P-element
	12	109	chr2R	21101574	21101644	P-element	6	2885	23	70	'11-12	45.57	2.9	5.9	intergenic	CG34396 +,ktub +	chr2R_23_21100001	chr2R_21100001	0.48	HISRD5146	P-element
	13	117	chr2R	22269351	22269418	P-element	7	2883	14	67	'6-8	49.39	4.3	2.6	intron	dve +	chr2R_14_22265001	chr2R_22265001	0.43	HISRD5146	P-element
	14	129	chr2R	24561608	24561680	P-element	2881	2886	16	72	'7-9	47.76	3.6	3.5	5` UTR	CG11414 +	chr2R_16_24560001	chr2R_24560001	0.44	HISRD5146	P-element
	15	132	chr2R	24949095	24949170	P-element	2886	2885	14	75	'8-6	48.87	2.8	3.7	5` UTR	CG12851 +	chr2R_14_24945001	chr2R_24945001	0.57	HISRD5146	P-element
	16	143	chr3L	5185045	5185090	P-element	17	2872	7	45	'5-2	40.66	3.3	1.6	intron	shep -	chr3L_7_5185001	chr3L_5185001	0.71	HISRD5146	P-element
	17	146	chr3L	9763429	9763526	P-element	2833	19	8	97	'2-6	40	3.2	1.9	intergenic	CG8177 +	chr3L_8_9760001	chr3L_9760001	0.25	HISRD5146	P-element
	18	152	chr3L	21879257	21879332	P-element	2886	2	16	75	'11-5	49.96	2.8	4.2	intron	mub +	chr3L_16_21875001	chr3L_21875001	0.69	HISRD5146	P-element
	19	154	chr3L	22834348	22834394	P-element	2771	2	12	46	'6-6	45.18	4.6	2.1	intron	jim -	chr3L_12_22830001	chr3L_22830001	0.5	HISRD5146	P-element
	20	165	chr3R	5624044	5624118	P-element	2885	2	16	74	'6-10	51.07	3.9	3.3	5` UTR,5` UTR	Spec2 -,CG2911 -	chr3R_16_5620001	chr3R_5620001	0.38	HISRD5146	P-element
	21	167	chr3R	11763956	11763978	P-element	2861	2	9	22	'3-6	58.23	4	1.8	5` UTR	Lk6 -	chr3R_9_11760001	chr3R_11760001	0.33	HISRD5146	P-element
	22	176	chr3R	21829558	21829581	P-element	2862	2	5	23	'2-3	53.46	5.2	0.8	intergenic	not near genes	chr3R_5_21825001	chr3R_21825001	0.4	HISRD5146	P-element
	23	177	chr3R	22133736	22133807	P-element	3	4	11	71	'8-3	51.7	3.5	2.4	intergenic	SKIP +,CG42390 +	chr3R_11_22130001	chr3R_22130001	0.73	HISRD5146	P-element
	24	178	chr3R	22589200	22589249	P-element	2859	1	13	49	'3-10	53.03	2.9	3.3	intron	Efa6 +	chr3R_13_22585001	chr3R_22585001	0.23	HISRD5146	P-element
	25	183	chr3R	24719981	24720051	P-element	2883	2884	16	70	'9-7	50.8	3.2	3.8	intron	tok +	chr3R_16_24715001	chr3R_24715001	0.56	HISRD5146	P-element
	26	186	chr3R	27608153	27608223	P-element	3	2883	13	70	'7-6	52.02	3.5	2.9	5` UTR	Tusp +	chr3R_13_27605001	chr3R_27605001	0.54	HISRD5146	P-element
	27	187	chr3R	28327047	28327107	P-element	9	9	5	60	'4-1	48.53	3.4	1.1	intron	larp -	chr3R_5_28325001	chr3R_28325001	0.8	HISRD5146	P-element
	28	189	chr3R	29782446	29782503	P-element	9	2878	5	57	'1-4	52.46	4.1	1	intron	kay +	chr3R_5_29780001	chr3R_29780001	0.2	HISRD5146	P-element
	29	190	chr3R	30004658	30004733	P-element	2885	1	5	75	'2-3	52	7.8	0.6	5` UTR	CG7911 -	chr3R_5_30000001	chr3R_30000001	0.4	HISRD5146	P-element
	30	194	chr3R	31725686	31725752	P-element	7	2882	15	66	'8-7	45.66	7.1	1.9	intron	ttk +	chr3R_15_31725001	chr3R_31725001	0.53	HISRD5146	P-element
	31	253	chrX	2297794	2297858	P-element	2880	2881	7	64	'5-2	48.88	3.4	1.6	intron	phl +	chrX_7_2295001	chrX_2295001	0.71	HISRD5146	P-element
	32	260	chrX	7995361	7995434	P-element	2885	3	14	73	'3-11	52.42	3	3.5	intergenic	Tbh +	chrX_14_7995001	chrX_7995001	0.21	HISRD5146	P-element
	33	261	chrX	8437146	8437327	P-element	36	2432	12	181	'11-1	43.84	3.8	2.5	5` UTR,5` UTR	CG12125 -,CG1440 +	chrX_12_8435001	chrX_8435001	0.92	HISRD5146	P-element
	34	268	chrX	15814664	15814688	P-element	28	4	5	24	'3-2	49.87	1.9	1.7	intron	sd +	chrX_5_15810001	chrX_15810001	0.6	HISRD5146	P-element

## Sheet: Shared_D46D51
	SHARED	Query_HISR_D46.SV#	Query_HISR_D46.Chr	Query_HISR_D46.Chr_coord_5p	Query_HISR_D46.Chr_coord_3p	Query_HISR_D51.SV#	Query_HISR_D51.Chr	Query_HISR_D51.Chr_coord_5p	Query_HISR_D51.Chr_coord_3p
	1	6	chr2L	11808212	11808285	15	chr2L	11808213	11808271		D46D51_1_F	GAGCAAAGCAAACTGAAAACTG	22		D46D51_1_R	ATGCCACACTTAGGAAGTTCAATA	24
	2	9	chr2L	14490449	14490469	18	chr2L	14490450	14490523		D46D51_2_F	CTCGGTGCGAAGACAATGAGG	21		D46D51_2_R	CTGCACCACGGCAACACTCGTC	22
	3	14	chr2L	17384084	17384144	24	chr2L	17384081	17384105		D46D51_3_F	GATAAGATTTCTCGGAATTGG	21		D46D51_3_R	CGGCGCACTGTGGTATTTTATCG	23
	4	19	chr2L	20523285	20523337	40	chr2L	20523300	20523470		D46D51_4_F	TGCATTGTTCTTGAGGTCCGC	21		D46D51_4_R	GAAAATACACTAAGTTAAGCCTCG	24
	5	20	chr2L	21135484	21135549	42	chr2L	21135501	21135704		D46D51_5_F	TCTGCAGAAGAGTTCTGCAAG	21		D46D51_5_R	ATTTCTTTAGAAAACGCAAAGCAA	24
	6	34	chr2R	11371095	11371165	79	chr2R	11371090	11371469		D46D51_6_F	GGAACTCTACGGCTATCCAAC	21		D46D51_6_R	ATATTTTTTATGTATACGCACTTA	24
	7	35	chr2R	12981176	12981250	81	chr2R	12981182	12981227		D46D51_7_F	TTGCCAGCCGTTTCTTTGTTCG	22		D46D51_7_R	GCGATTTCTGCTGACGGAAATTGC	24
	8	38	chr2R	15600420	15600449	92	chr2R	15600425	15600447		D46D51_8_F	TGTCGACTTCGACTGCAGCGC	21		D46D51_8_R	ACGCAAGAGATCGTAGTTAAGAG	23
	9	46	chr2R	19456998	19457069	98	chr2R	19456777	19457066		D46D51_9_F	CTTTTCAGCTTTAGCTTTTCTTGG	24		D46D51_9_R	TATTACAAAGCACACATACACCGA	24
	10	52	chr2R	20698348	20698416	104	chr2R	20698348	20698408		D46D51_10_F	TTTATTACCTGAGACATTATATTC	24		D46D51_10_R	ACTGACTGGTAATCGGCGCTC	21
	11	57	chr2R	21101592	21101643	109	chr2R	21101574	21101644		D46D51_11_F	AAAGTTGTATAATTTTTCAACAC	23		D46D51_11_R	TCCTGTGGCTGCTTCCTCTTC	21
	12	63	chr2R	22269348	22269409	117	chr2R	22269351	22269418		D46D51_12_F	CACTCTCTCGCACTGTCCAATGC	23		D46D51_12_R	CTCTGCCGGTTTAAGGATTAACAC	24
	13	72	chr2R	24561609	24561678	129	chr2R	24561608	24561680		D46D51_13_F	TAACTTAACATTAACAAAGCTTC	23		D46D51_13_R	GTTTGTTTACTCTTTTGGAATATC	24
	14	75	chr2R	24949097	24949168	132	chr2R	24949095	24949170		D46D51_14_F	ACATAAAATTTACAGTTACGTGG	23		D46D51_14_R	TTTGGCCGTTATTCATTACTTCGC	24
	15	82	chr3L	9763468	9763542	146	chr3L	9763429	9763526		D46D51_15_F	TAAATTTTATATTTCATGCTACAA	24		D46D51_15_R	TTATCCGCAGTTTCTGCGTTTCC	23
	16	86	chr3L	21879265	21879333	152	chr3L	21879257	21879332		D46D51_16_F	TTCATATTATCTTAATCGACTTGC	24		D46D51_16_R	GGTCATCTCACTCGCACCAGAAAC	24
	17	88	chr3L	22834338	22834391	154	chr3L	22834348	22834394		D46D51_17_F	AAAACAAAGCAAACTCCATCAAAC	24		D46D51_17_R	ACTTACCCACAGTTCTTCATG	21
	18	92	chr3R	5624043	5624118	165	chr3R	5624044	5624118		D46D51_18_F	GCAAATAGCAAATGTCGTCATG	22		D46D51_18_R	ATCGATGCATCGCCTTATATCGAT	24
	19	101	chr3R	21829553	21829577	176	chr3R	21829558	21829581		D46D51_19_F	TAAATGTGCATATGGTATCAACTC	24		D46D51_19_R	AAGCGGAGAGGAGAGTCGCGA	21
	20	102	chr3R	22133738	22133802	177	chr3R	22133736	22133807		D46D51_20_F	AAATAGAAACAAACAATTTATTGA	24		D46D51_20_R	AGTTTCAATTTCACGCGAATAGAC	24
	21	103	chr3R	22589196	22589246	178	chr3R	22589200	22589249		D46D51_21_F	CGGAAAACAAATTATTCATGACGT	24		D46D51_21_R	AGACAGCCATGGTCATCACCATA	23
	22	107	chr3R	24719985	24720054	183	chr3R	24719981	24720051		D46D51_22_F	GAGATCTTTGATCTGGCTAAG	21		D46D51_22_R	CATTTGACTCAAACAAGTTTGTTG	24
	23	110	chr3R	27608154	27608225	186	chr3R	27608153	27608223		D46D51_23_F	TAAATAGAAATACAGTAACCAG	22		D46D51_23_R	CATGCAGCGCGGTTGGAGTAC	21
	24	111	chr3R	28327040	28327114	187	chr3R	28327047	28327107		D46D51_24_F	TCATAGATCGAAAACAGGTGATAC	24		D46D51_24_R	TTCTCTCTCTTTGTTTTGAAG	21
	25	115	chr3R	31725684	31725752	194	chr3R	31725686	31725752		D46D51_25_F	TGTAAAGTGATCTCTCCGCAG	21		D46D51_25_R	AGTTGACACGTCCTCACTCGA	21
	26	128	chrX	2297788	2297863	253	chrX	2297794	2297858		D46D51_26_F	TGGCACCAACTCTCTTATTTGTG	23		D46D51_26_R	TAATTACCGTTAACCAAGCCTAG	23
	27	135	chrX	8437135	8437179	261	chrX	8437146	8437327		D46D51_27_F	GAAAGCCGGATGGTATAAAAGAG	23		D46D51_27_R	TATTAACTTACACATATTTAATGG	24
	D46 only
		Query_HISR_D46.SV#	Query_HISR_D46.Chr	Query_HISR_D46.Chr_coord_5p	Query_HISR_D46.Chr_coord_3p	Query_HISR_D51.SV#	Query_HISR_D51.Chr	Query_HISR_D51.Chr_coord_5p	Query_HISR_D51.Chr_coord_3p
	1	33	chr2R	9553431	9553482						D46only_1_F	TCGGAAGACAAACGGCGAGTC	21		D46only_1_R	AGCGAAACCACGGCAACAGACTTG	24
	2	39	chr2R	18357272	18357339						D46only_2_F	TTTAGTCCTTCTTGCTTGTTG	21		D46only_2_R	GTTTGAAATCGCGATAACTATATC	24
	3	78	chr3L	6964329	6964387						D46only_3_F	AACACAAATTGCAAGGCTAAGG	22		D46only_3_R	TCGTGATAACTCTGGTGGACAAG	23
	4	79	chr3L	7134447	7134493						D46only_4_F	CTGTTCTGCGAAACGGTAGCA	21		D46only_4_R	GAAAGCGACGGATACGAGCCG	21
	5	81	chr3L	8240894	8240965						D46only_5_F	TAGCATTTTACTTAGACTATTTGC	24		D46only_5_R	GCAGGTTGCCATAGCGGCCACATC	24
	6	95	chr3R	16305672	16305741						D46only_6_F	GCAGTTTTCTTGCTACTTACCTG	23		D46only_6_R	TTCTAGATGCGCACAGGTGTTGAG	24
	7	130	chrX	4075574	4075636						D46only_7_F	GAGGATATCCTCGAAGTCCTC	21		D46only_7_R	TGTCGAACTTTCGAACGCACTG	22
	8	132	chrX	5679938	5680013						D46only_8_F	GAAGCGCTGCTTGGGCCAACT	21		D46only_8_R	CAATCGATAGAACGCCGATTTC	22
	9	136	chrX	9134986	9135048						D46only_9_F	ACGGGACAATAACAAGAATAG	21		D46only_9_R	GTTGTTGCCGCTTGTTGTAGTTG	23
		Query_HISR_D46.SV#	Query_HISR_D46.Chr	Query_HISR_D46.Chr_coord_5p	Query_HISR_D46.Chr_coord_3p	Query_HISR_D51.SV#	Query_HISR_D51.Chr	Query_HISR_D51.Chr_coord_5p	Query_HISR_D51.Chr_coord_3p
	1					8	chr2L	3124762	3124783		D51only_1_F	TGCAGAGCGACGAGAGCGATG	21		D51only_1_R	CCACGCTCTCTCAGTCGCTCT	21
	2					143	chr3L	5185045	5185090		D51only_2_F	AATGACAAAATAGTTGTAGAAAAG	24		D51only_2_R	CGGAGGCAGAACTGACGTCAGTTC	24
	3					167	chr3R	11763956	11763978		D51only_3_F	GGTTGATGAAAAAACTGATTC	21		D51only_3_R	AGCGGTGCAAATAGATAAACC	21
	4					189	chr3R	29782446	29782503		D51only_4_F	TCCAAAAGTCAGCGAGCAGAG	21		D51only_4_R	GCCGATGGCTCGCCTTTTATTCGA	24
	5					190	chr3R	30004658	30004733		D51only_5_F	CATAAAACGACTCGGACTCCA	21		D51only_5_R	TCAAGTCTTCATTACCAGTACT	22
	6					260	chrX	7995361	7995434		D51only_6_F	AAGAAGTGTATAAATGGAAAGG	22		D51only_6_R	CTTCGGCTTCGGCTTCGGCTG	21
	7					268	chrX	15814664	15814688		D51only_7_F	CATCGCTATAGAGTAAACTCTC	22		D51only_7_R	AAGAACCACTGTGTTATCTTAAAC	24

## Sheet: HISR_N17N25
								SV#	Chr	Chr_coord_5p	Chr_coord_3p	HISRN1741_Inserts_Annotated.TE	TE_coord_start	TE_coord_end	Reads_collapsed	Chr_Coord_Dist	Symmetry	avg_blat_score	Norm_RefGen_Reads	Coverage_Ratio	classification	comments	insert_code	loci_code	Sym_score	libname	Field0
N17_1_F	GCCATCGCAACCGATCCGATG	21		N17_1_R	ATCCGAACCGATCACCACTCC	21	1	4	chr2L	5029556	5029617	P-element	4	10	7	61	'4-3	47.15	2.5	2	intergenic	Cg25C +	chr2L_7_5025001	chr2L_5025001	0.57	HISRN1741	P-element
N17_2_F	TCGCCCGTTCGTTCCTTGGCTTG	23		N17_2_R	AACAATCGCACCGATTACGCTGTC	24	2	8	chr2L	13514409	13514463	P-element	13	2876	4	54	'3-1	44	2.1	1.3	intron	B4 -	chr2L_4_13510001	chr2L_13510001	0.75	HISRN1741	P-element
N17_3_F	GGTTGTGAGCACTGCTAGGTTC	22		N17_3_R	TAAGGAGCCGTTCGAACTGCTG	22	3	14	chr2R	5138983	5139044	P-element	2	2872	9	61	'6-3	52.99	2	3	intergenic	not near genes	chr2R_9_5135001	chr2R_5135001	0.67	HISRN1741	P-element
N17_4_F	AAACGAAATGTGCTCTGCTCA	21		N17_4_R	GCCAAGTGAAAATCGAAGCTC	21	4	16	chr2R	6220494	6220550	P-element	2883	2870	4	56	'2-2	51.83	3.2	1	intron	bin3 +	chr2R_4_6220001	chr2R_6220001	0.5	HISRN1741	P-element
N17_5_F	GTGAAAGCTTCAATGCGAATAAG	23		N17_5_R	ATTCAAATCGAATGCGCGAGTG	22	5	18	chr2R	7766854	7766892	P-element	2875	28	5	38	'4-1	45.14	4.4	0.9	intron,intron	CG30497 -,CG45093 -	chr2R_5_7765001	chr2R_7765001	0.8	HISRN1741	P-element
N17_6_F	TTTCATCAAAAGTGCGCCACACG	23		N17_6_R	GTTGTGGAGAGTTGCGCGCAAG	22	6	19	chr2R	9552630	9552682	P-element	2871	9	4	52	'2-2	53.01	3.6	0.9	intergenic	CR43651 +	chr2R_4_9550001	chr2R_9550001	0.5	HISRN1741	P-element
N17_7_F	CGCATAACACATGCGGACAGG	21		N17_7_R	GGAATTTTGAGTAGCCAATCTTTA	24	7	20	chr2R	11614470	11614526	P-element	2871	4	4	56	'1-3	53.72	4.6	0.7	intron	tou -	chr2R_4_11610001	chr2R_11610001	0.25	HISRN1741	P-element
N17_8_F	TGATCTTTGGTAATAGCAAACA	22		N17_8_R	CGGCTAAAGCGAGAGAGCAGAC	22	8	22	chr2R	12780332	12780384	P-element	15	2877	4	52	'1-3	52.88	3	1	intergenic	sca +	chr2R_4_12780001	chr2R_12780001	0.25	HISRN1741	P-element
N17_9_F	CGGTCTTATATGCGTCCTTAG	21		N17_9_R	CAATTGAAATTCACTTTACCGAA	23	9	26	chr2R	17717535	17717589	P-element	2869	2881	5	54	'3-2	49.98	3.3	1.2	5` UTR	CG6424 -	chr2R_5_17715001	chr2R_17715001	0.6	HISRN1741	P-element
N17_10_F	TCCTGTAGATCCGATTTGAATTTC	24		N17_10_R	TATGTGACATCGATAAAGGAAGG	23	10	33	chr3L	14631989	14632047	P-element	2885	2869	5	58	'2-3	51.99	2.6	1.4	5` UTR	RecQ5 -	chr3L_5_14630001	chr3L_14630001	0.4	HISRN1741	P-element
N17_11_F	CCATAATTCTCATAATTGAGATAT	24		N17_11_R	AGCCGTGTACAATGATCTCGAG	22	11	34	chr3L	15968183	15968216	P-element	12	2855	4	33	'3-1	48.03	1.6	1.5	intergenic	CG10516 +,l(3)72Ab -	chr3L_4_15965001	chr3L_15965001	0.75	HISRN1741	P-element
N17_12_F	TCGCTATTTGGGGAATAAGTCAA	23		N17_12_R	GACATCGACACACAAACACAAATG	24	12	39	chr3R	19165555	19165621	P-element	2883	2881	11	66	'7-4	52.27	3.2	2.6	intron	sqz +	chr3R_11_19165001	chr3R_19165001	0.64	HISRN1741	P-element
N17_13_F	TCGCCTTGGGCAGTGGGATGA	21		N17_13_R	CCAAAGCGAAGTGCAGTCGTC	21	13	42	chr3R	23922522	23922556	P-element	2852	2886	7	34	'3-4	47.43	3.7	1.5	intron	sba -	chr3R_7_23920001	chr3R_23920001	0.43	HISRN1741	P-element
N17_14_F	GTGGCGCTGCACTGTCTGATT	21		N17_14_R	CTAAACGTAAGCACATACATCGAA	24	14	45	chr3R	24813928	24813982	P-element	12	2875	11	54	'5-6	47.58	1.9	3.8	5` UTR	CG5807 -	chr3R_11_24810001	chr3R_24810001	0.45	HISRN1741	P-element
N17_15_F	CAGTGGCAGCAACAACAGCAAC	22		N17_15_R	GTATTTATCACGCGCACCGATC	22	15	46	chr3R	26230174	26230244	P-element	2886	2880	4	70	'2-2	61.67	1.5	1.6	intergenic	CG12290 +	chr3R_4_26230001	chr3R_26230001	0.5	HISRN1741	P-element
								SV#	Chr	Chr_coord_5p	Chr_coord_3p	HISRN2541_Inserts_Annotated.TE	TE_coord_start	TE_coord_end	Reads_collapsed	Chr_Coord_Dist	Symmetry	avg_blat_score	Norm_RefGen_Reads	Coverage_Ratio	classification	comments	insert_code	loci_code	Sym_score	libname	Field0
N25_1_F	ATTGGCATCGCTGGAGCTTACC	22		N25_1_R	ACCAGCTCTGGAGATGCTGCCT	22	1	2	chr2L	559650	559705	P-element	2875	11	6	55	'3-3	49.55	3.1	1.5	5` UTR,5` UTR	rempA -,CG2789 +	chr2L_6_555001	chr2L_555001	0.5	HISRN2541	P-element
N25_2_F	ATCCGGCTGCGGGAAATACCC	21		N25_2_R	GAGTGCAGCTCGTGCGGCTTAAG	23	2	4	chr2L	1077948	1078003	P-element	13	10	4	55	'2-2	46.34	3.1	1	5` UTR	ast +	chr2L_4_1075001	chr2L_1075001	0.5	HISRN2541	P-element
N25_3_F	CTAGCGAGCGATTAGATTTCCA	22		N25_3_R	ACCGCACCGCGCACAGTGGAA	21	3	7	chr2L	12010706	12010767	P-element	2882	12	5	61	'2-3	57.07	3	1.2	intergenic	not near genes	chr2L_5_12010001	chr2L_12010001	0.4	HISRN2541	P-element
N25_4_F	TTTCTAGGTAAGATCATAGATC	22		N25_4_R	CAGGTTTCGCCTTGTTTATGTAGA	24	4	10	chr2L	15333553	15333620	P-element	5	6	4	67	'1-3	64.08	2.8	1.1	intergenic	esg +	chr2L_4_15330001	chr2L_15330001	0.25	HISRN2541	P-element
N25_5_F	GTTTTGTTTTCGCTTCGTAGTA	22		N25_5_R	CTTCGCGCACGGATCGTTCGTTG	23	5	22	chr3L	128496	128640	P-element	2876	2871	7	144	'5-2	53.71	1.9	2.4	intergenic	not near genes	chr3L_7_125001	chr3L_125001	0.71	HISRN2541	P-element
N25_6_F	GTCAACGATGACGTCACAGCG	21		N25_6_R	GATAGATCGCGTTTGGTTAGCTTG	24	6	24	chr3L	8424974	8425029	P-element	2879	14	5	55	'3-2	50.29	3.7	1.1	5` UTR	Cbl +	chr3L_5_8420001	chr3L_8420001	0.6	HISRN2541	P-element
N25_7_F	CAGGTCAAAGCTCTGAAGCGTC	22		N25_7_R	TGACGGCGGTCCTATGTCCTAC	22	7	25	chr3L	11070499	11070551	P-element	7	19	5	52	'3-2	45.07	0.6	3.1	intergenic	Mocs1 +	chr3L_5_11070001	chr3L_11070001	0.6	HISRN2541	P-element
N25_8_F	TCATATTGCTTAAGAAAATGTAC	23		N25_8_R	CGATGGCCTCCTGGCTCAGAG	21	8	29	chr3R	7151310	7151372	P-element	2	14	8	62	'2-6	46.4	3	2	intergenic	CG2656 +,Sas-4 +,gfzf -	chr3R_8_7150001	chr3R_7150001	0.25	HISRN2541	P-element
N25_9_F	ATTAAAAACTGCAATCAAAGTTTC	24		N25_9_R	CGAGCGGCAATGTTGTTAGGAC	22	9	30	chr3R	15804197	15804247	P-element	13	2872	4	50	'2-2	44	1.8	1.4	intergenic	alpha-Man-IIb +	chr3R_4_15800001	chr3R_15800001	0.5	HISRN2541	P-element
N25_10_F	GCCACAAATTAAAGTTAAAAGTG	23		N25_10_R	CCTGCGTTATTTAGTGCAAACT	22	10	42	chrX	2642999	2643034	P-element	22	2867	7	35	'4-3	34.18	2.3	2.1	intron	sgg +	chrX_7_2640001	chrX_2640001	0.57	HISRN2541	P-element
N25_11_F	ATTGTATGTATGAATGGTATGTAG	24		N25_11_R	AGTAATAATTACTGCTGTACAAC	23	11	46	chrX	10584440	10584501	P-element	2882	12	5	61	'1-4	46.13	1.8	1.8	intron	spri -	chrX_5_10580001	chrX_10580001	0.2	HISRN2541	P-element
N25_12_F	CTGCCACGTAGAACACGATCATTG	24		N25_12_R	AGAATATAATCAAGTGCAATAAC	23	12	51	chrX	17738397	17738454	P-element	2885	2868	7	57	'3-4	51.09	2.2	2.2	intron	CG42684 +	chrX_7_17735001	chrX_17735001	0.43	HISRN2541	P-element
