# Supplementary material for: Har-P, a short P-element variant, weaponizes P-transposase to severely impair Drosophila development
Source: eLife. 2019 Dec 17;8:e49948. doi: 10.7554/eLife.49948 (PMC6917496; doi:10.7554/eLife.49948)
Supplement: Figure 5—figure supplement 2—source data 1. [file elife-49948-fig5-figsupp2-data1.xlsx]

## Sheet: GDdataFig5S2B
FLY OVARY SQUASH ASSAY RECORDING SHEET
Experimenter Name Jasmine Pierre		INSTRUCTIONS: 1) First record the vial ID, genotypes of females and males in the cross.	2) Use the Needle valve to use CO2 gas to anesthetize flies. 3) Sort out females only on flypad	4) Mark the cross name on glass slide. 5) Transfer 12-18 females to slide, spread out on bench only, AWAY from flypad		6) Immediately add 2-3 drops green food dye. 7) Carefully and completely squash flies with large coverslip. 8) Counts squashed flies for Fertile or Dysgenic females
Vial ID	Date of Fly Squash Assay	Female in Cross	Male in Cross	Visible PhenoType Marker?	Number with more than 2 Eggs (Fertile)	Number lacking any Eggs (Dysgenic)	Notes
EXAMPLE	Today's date	#33 Virgin Females TJ-Gal4 5/18	#62 Male TRiP shRtf1 5/18	Curly wing	10	2	They all look young
	''	''	''	Straight wing	1	4	Wait for 2nd hatching
skip a line in between each vial
1.1	20190926	#38 ISO1-UC virgins	#140 RAL-508	straight wing, red eyes	27	3	4 virgins returned for 2nd hatch
1.2	20190926	#38 ISO1-UC virgins	#140 RAL-508	straight wing, red eyes	38	0	1 virgins returned for 2nd hatch
1.3	20190926	#38 ISO1-UC virgins	#140 RAL-508	straight wing, red eyes	46	12
					111	15
2.1	20190926	#38 ISO1-UC virgins	#140 RAL-855	straight wing, red eyes	50	6
2.2	20190926	#38 ISO1-UC virgins	#140 RAL-855	straight wing, red eyes	28	8
2.3	20190926	#38 ISO1-UC virgins	#140 RAL-855	straight wing, red eyes	48	9
					126	23
1.1	20190930	#38 ISO1-UC virgins	#140 RAL-508	straight wing, red eyes	20	1
1.2	20190930	#38 ISO1-UC virgins	#140 RAL-508	straight wing, red eyes	11	1
1.3	20190930	#38 ISO1-UC virgins	#140 RAL-508	straight wing, red eyes	23	0
					54
2.1	20190930	#38 ISO1-UC virgins	#140 RAL-855	straight wing, red eyes	11	1
2.2	20190930	#38 ISO1-UC virgins	#140 RAL-855	straight wing, red eyes	16	3
2.3	20190930	#38 ISO1-UC virgins	#140 RAL-855	straight wing, red eyes	15	1
					42	5
		#38 ISO1-UC virgins	#140 RAL-508		165	15	0.0833333
		#38 ISO1-UC virgins	#140 RAL-855		168	28	0.142857

## Sheet: qPCRdataFig5S2C
Combined 2 biological replicates SB20191003
Replicate - Strain	Rp49_Ct1	Rp49_Ct2	Rp49_Ct3	Rp49_Ct4	Rp49_Ct5	Rp49_Avg Ct	s1= SD of Rp49	s12 =Variance	F10-R10_Ct1	F10-R10_Ct2	F10-R10_Ct3	F10-R10_Ct4	F10-R10_Ct5	F10-R10 Avg Ct	s2=SD of F10-R10	s22= Variance	sd=√(s12+s22)	SEM=s/√n	dCT	ddCT	Total-P RQ%
#38 ISO1	19.26	19.14	19.269	19.5	19.9	19.4138	0.301417	0.0908522	32	32.568	32.706	30.904	31.416	31.9188	0.763277	0.582591	0.820636	0.335023	12.505	20.4146	7.15473e-07
#53 Har	21.004	21.028	20.986	21.285	21.226	21.1058	0.13904	0.0193322	13.287	13.001	13.342	13.268	13.083	13.1962	0.146266	0.0213937	0.201807	0.0823872	-7.9096	0	1
#140 RAL508	22	21.28	21.476	20.36	20.412	21.1056	0.707913	0.501141	17.611	17.501	17.531	16.948	17.057	17.3296	0.30375	0.0922638	0.770328	0.314485	-3.776	4.1336	0.0569721
#141 RAL855	20.075	20.132	19.891	19.252	21.432	20.1564	0.794159	0.630688	15.505	15.378	15.433	15.885	15.754	15.591	0.218366	0.0476835	0.823633	0.336247	-4.5654	3.3442	0.0984681
#125 RAL42	20.162	19.811	19.851	20	18.693	19.7034	0.581497	0.338139	16.145	16.008	16.352	14.401	14.463	15.4738	0.959131	0.919933	1.12164	0.457907	-4.2296	3.68	0.0780207
#126 RAL377	20.05	20.372	20.25	19.473	18.615	19.752	0.723156	0.522955	16.032	15.984	16.398	14.089	14.179	15.3364	1.10971	1.23146	1.32454	0.540742	-4.4156	3.494	0.0887567
Replicate - Strain	Total-P RQ%	SEM=s/√n	SEM propogated
ISO1	7.15473e-07	0.335023	0.00335023
Har	1	0.0823872	0.000823872
RAL508	0.0569721	0.314485	0.00314485
RAL855	0.0984681	0.336247	0.00336247
RAL42	0.0780207	0.457907	0.00457907
RAL377	0.0887567	0.540742	0.00540742
