# Supplementary material for: Har-P, a short P-element variant, weaponizes P-transposase to severely impair Drosophila development
Source: eLife. 2019 Dec 17;8:e49948. doi: 10.7554/eLife.49948 (PMC6917496; doi:10.7554/eLife.49948)
Supplement: Figure 5—source data 1. [file elife-49948-fig5-data1.xlsx]

## Sheet: Fig5C-FLP
Sample name	rp49_CT1	rp49_CT2	rp49_AvgCT	P-F10R10_CT1	P-F10R10_CT2	P-F10R10_AvgCT	dCT	ddCT	% FLP load	% FLP load
Harwich_rep1	19.184	19.653	19.4185	11.65	11.398	11.524	7.8945	0	1	1
Harwich_rep2	19.835	19.661	19.748	10.803	10.859	10.831	8.917	0	1	1
Harwich_rep3	18.841	19.143	18.992	10.472	10.267	10.3695	8.6225	0	1	1
HISR-N10_rep1	20.683	20.795	20.739	16.07	15.946	16.008	4.731	3.1635	0.111607	0.111607
HISR-N10_rep2	19.619	19.732	19.6755	15.071	14.884	14.9775	4.698	4.219	0.0536975	0.0536975
HISR-N10_rep3	18.908	19.071	18.9895	14.119	14.217	14.168	4.8215	3.801	0.0717439	0.0717439
HISR-N17_rep1	20.791	20.718	20.7545	28.603	28.388	28.4955	-7.741	15.6355	1.96447e-05	1.96447e-05
HISR-N17_rep2	19.106	19.053	19.0795	27.956	27.456	27.706	-8.6265	17.5435	5.23456e-06	5.23456e-06
HISR-N17_rep3	19.368	19.32	19.344	27.132	27.008	27.07	-7.726	16.3485	1.19843e-05	1.19843e-05
HISR-N25_rep1	21.474	21.296	21.385	28.934	29	28.967	-7.582	15.4765	2.19336e-05	2.19336e-05
HISR-N25_rep2	19.157	19.061	19.109	28.325	28.122	28.2235	-9.1145	18.0315	3.73231e-06	3.73231e-06
HISR-N25_rep3	19.294	19.3	19.297	29.564	28.812	29.188	-9.891	18.5135	2.67228e-06	2.67228e-06
HISR-N31_rep1	18.948	19.486	19.217	25.926	26.242	26.084	-6.867	14.7615	3.60036e-05	3.60036e-05
HISR-N31_rep2	19.758	19.55	19.654	26.459	26.465	26.462	-6.808	15.725	1.8463e-05	1.8463e-05
HISR-N31_rep3	18.561	18.196	18.3785	27.713	27.798	27.7555	-9.377	17.9995	3.81602e-06	3.81602e-06
HISR-D29_rep1	19.33	20.356	19.843	13.155	12.939	13.047	6.796	1.0985	0.467002	0.467002
HISR-D29_rep2	21.091	21.102	21.0965	14.093	14.185	14.139	6.9575	1.9595	0.257118	0.257118
HISR-D29_rep3	19	19.103	19.0515	12.883	12.966	12.9245	6.127	2.4955	0.177329	0.177329
HISR-D43_rep1	18.09	18.589	18.3395	12.822	12.782	12.802	5.5375	2.357	0.195197	0.195197
HISR-D43_rep2	20.137	20.067	20.102	12.625	12.456	12.5405	7.5615	1.3555	0.390799	0.390799
HISR-D43_rep3	20.097	20.035	20.066	12.785	13.17	12.9775	7.0885	1.534	0.345319	0.345319
HISR-D46_rep1	18.452	19.207	18.8295	13.446	13.356	13.401	5.4285	2.466	0.180992	0.180992
HISR-D46_rep2	19.677	19.399	19.538	13.309	13.174	13.2415	6.2965	2.6205	0.162611	0.162611
HISR-D46_rep3	19.444	19.64	19.542	13.378	13.781	13.5795	5.9625	2.66	0.15822	0.15822
HISR-D51_rep1	19.336	19.751	19.5435	13.672	13.586	13.629	5.9145	1.98	0.25349	0.25349
HISR-D51_rep2	19.548	19.391	19.4695	13.122	13.162	13.142	6.3275	2.5895	0.166143	0.166143
HISR-D51_rep3	21	20.421	20.7105	14.197	14.253	14.225	6.4855	2.137	0.227352	0.227352
ISO1_rep1	18.233	17.818	18.0255	28.619	28.575	28.597	-10.5715	18.466	2.76172e-06	2.76172e-06
ISO1_rep2	20.357	20.866	20.6115	28.619	28.575	28.597	-7.9855	16.9025	8.16283e-06	8.16283e-06
ISO1_rep3	18.233	17.818	18.0255	27.364	27.383	27.3735	-9.348	17.9705	3.8935e-06	3.8935e-06
Lk-Sl2_rep1	19.642	19.525	19.5835	17.047	17.077	17.062	2.5215	5.373	0.0241305	0.0241305
Lk-Sl2_rep2	20.826	20.934	20.88	15.008	15.188	15.098	5.782	3.135	0.113834	0.113834
Lk-Sl2_rep3	19.593	20	19.7965	15.703	15.566	15.6345	4.162	4.4605	0.0454209	0.0454209
OreR-TK_rep1	19.316	18.747	19.0315	16.75	16.788	16.769	2.2625	5.632	0.020165	0.020165
OreR-TK_rep2	21.076	21.13	21.103	15.696	15.672	15.684	5.419	3.498	0.088511	0.088511
OreR-TK_rep3	20.642	20.614	20.628	17.049	16.982	17.0155	3.6125	5.01	0.0310341	0.0310341
OreR-TOW_rep1	19.485	18.869	19.177	25.517	25.544	25.5305	-6.3535	14.248	5.13954e-05	5.13954e-05
OreR-TOW_rep2	21.28	21.412	21.346	27.466	27.027	27.2465	-5.9005	14.8175	3.46328e-05	3.46328e-05
OreR-TOW_rep3	20.961	20.767	20.864	28.47	29	28.735	-7.871	16.4935	1.08383e-05	1.08383e-05
pi[2]_rep1	20.277	19.829	20.053	14.15	15.029	14.5895	5.4635	3.159	0.111956	0.111956
pi[2]_rep2	20.838	20.826	20.832	14.509	14.541	14.525	6.307	2.61	0.163799	0.163799
pi[2]_rep3	20.545	20.466	20.5055	14.099	14.04	14.0695	6.436	2.1865	0.219684	0.219684
Birm2_rep1	19.452	19.524	19.488	17.176	17.21	17.193	2.295	5.5995	0.0206245	0.0206245
Birm2_rep2	20.7	20.816	20.758	18.345	18.18	18.2625	2.4955	6.127	0.0143083	0.0143083
Birm2_rep3	18.452	18.352	18.402	16.313	16.259	16.286	2.116	6.801	0.00896799	0.00896799
OreR-MOD_rep1	19.246	18.529	18.8875	14.582	14.551	14.5665	4.321	3.5735	0.0839981	0.0839981
OreR-MOD_rep2	21.366	21.206	21.286	17.502	17.52	17.511	3.775	5.142	0.0283207	0.0283207
OreR-MOD_rep3	21.292	21.361	21.3265	16.974	17.085	17.0295	4.297	4.3255	0.0498764	0.0498764
Strain	rep1	rep2	rep3	Average	Stdev
Harwich	1	1	1	1	0
HISR-D29	0.467002	0.257118	0.177329	0.300483	0.149626
HISR-D43	0.195197	0.390799	0.345319	0.310438	0.10236
HISR-D46	0.180992	0.162611	0.15822	0.167274	0.0120813
HISR-D51	0.25349	0.166143	0.227352	0.215662	0.0448314
HISR-N10	0.111607	0.0536975	0.0717439	0.0790162	0.0296318
HISR-N17	1.96447e-05	5.23456e-06	1.19843e-05	1.22878e-05	7.20987e-06
HISR-N25	2.19336e-05	1.19843e-05	3.73231e-06	1.255e-05	9.11381e-06
HISR-N31	2.67228e-06	3.60036e-05	1.8463e-05	1.90463e-05	1.66733e-05
ISO1	2.76172e-06	8.16283e-06	3.8935e-06	4.93935e-06	2.84839e-06
Lk-SL2	0.0241305	0.113834	0.0454209	0.0611284	0.0468691
OreR-MOD	0.0839981	0.0283207	0.0498764	0.054065	0.028074
OreR-TK	0.020165	0.088511	0.0310341	0.04657	0.0367262
OreR-TOW	5.13954e-05	3.46328e-05	1.08383e-05	3.22889e-05	2.03799e-05
pi[2]	0.111956	0.163799	0.219684	0.165146	0.0538766
Birm2	0.0206245	0.0143083	0.00896799	0.0146336	0.00583504

## Sheet: Fig5C-1.5kb_KP-like
Sample	rp49_Ct1	rp49_Ct2	rp49_AvgCt	1.5kb_KP_Ct1	1.5kb_KP_Ct2	P-ele_AvgCt	dCT	ddCT	%	%
Har_rep1	21.611	21.733	21.672	14	13.473	13.7365	7.9355	0	1	1
Har_rep2	21.348	21.339	21.3435	12.692	12.813	12.7525	8.591	0	1	1
Har_rep3	20.863	20.583	20.723	12.406	12.117	12.2615	8.4615	0	1	1
ISO1_rep1	20.619	20.657	20.638	27.12	27.267	27.1935	-6.5555	14.491	4.34285e-05	4.34285e-05
ISO1_rep2	21.251	21.199	21.225	27.458	27.826	27.642	-6.417	14.3525	4.78043e-05	4.78043e-05
ISO1_rep3	20.136	20.081	20.1085	29.08	29.996	29.538	-9.4295	17.365	5.92399e-06	5.92399e-06
HISR-N10_rep1	20.519	20.344	20.4315	16.062	15.751	15.9065	4.525	3.4105	0.0940453	0.0940453
HISR-N10_rep2	21.034	21.013	21.0235	17.009	16.693	16.851	4.1725	3.763	0.0736587	0.0736587
HISR-N10_rep3	18.574	19.761	19.1675	15.689	15.54	15.6145	3.553	4.3825	0.0479442	0.0479442
HISR-N17_rep1	20.31	20.258	20.284	28.923	28.276	28.5995	-8.3155	16.251	1.28222e-05	1.28222e-05
HISR-N17_rep2	19.833	19.889	19.861	28.938	28.902	28.92	-9.059	17.65	4.86206e-06	4.86206e-06
HISR-N17_rep3	20.378	20.286	20.332	29.65	29.52	29.585	-9.253	17.7145	4.64948e-06	4.64948e-06
HISR-N25_rep1	20.095	20.467	20.281	28.112	27.791	27.9515	-7.6705	15.606	2.00505e-05	2.00505e-05
HISR-N25_rep2	20.556	20.744	20.65	28.421	28.421	28.421	-7.771	16.362	1.18726e-05	1.18726e-05
HISR-N25_rep3	20.654	20.797	20.7255	28.331	29.698	29.0145	-8.289	16.7505	9.06979e-06	9.06979e-06
HISR-N31_rep1	20.75	20.813	20.7815	29.055	28.93	28.9925	-8.211	16.1465	1.37854e-05	1.37854e-05
HISR-N31_rep2	19.761	19.658	19.7095	27.567	27.64	27.6035	-7.894	16.485	1.09024e-05	1.09024e-05
HISR-N31_rep3	21.721	21.737	21.729	30.314	30.036	30.175	-8.446	16.9075	8.13458e-06	8.13458e-06
HISR-D29_rep1	19.33	20.356	19.843	15.051	14.864	14.9575	4.8855	3.05	0.120742	0.120742
HISR-D29_rep2	21.091	21.102	21.0965	13.73	13.842	13.786	7.3105	1.2805	0.411653	0.411653
HISR-D29_rep3	19	19.103	19.0515	14.964	14	14.482	4.5695	3.892	0.0673583	0.07
HISR-D43_rep1	18.09	18.589	18.3395	14.244	14.097	14.1705	4.169	3.7665	0.0734802	0.0734802
HISR-D43_rep2	22.134	22.1	22.117	15.426	15.565	15.4955	6.6215	1.9695	0.255342	0.255342
HISR-D43_rep3	18.9	18.962	18.931	12.158	12.283	12.2205	6.7105	1.751	0.297096	0.297096
HISR-D46_rep1	18.452	19.207	18.8295	15.556	15.329	15.4425	3.387	4.5485	0.0427332	0.0427332
HISR-D46_rep2	20.386	20.321	20.3535	14.135	14.197	14.166	6.1875	2.4035	0.189005	0.189005
HISR-D46_rep3	20.054	19.954	20.004	13.702	13.783	13.7425	6.2615	2.2	0.217638	0.217638
HISR-D51_rep1	19.336	19.751	19.5435	15.404	15.393	15.3985	4.145	3.7905	0.072268	0.072268
HISR-D51_rep2	22.002	21.875	21.9385	15.663	15.756	15.7095	6.229	2.362	0.194521	0.194521
HISR-D51_rep3	21.775	21.678	21.7265	15.395	15.445	15.42	6.3065	2.155	0.224533	0.224533
	Strain	1.5kb_KP_rep1	1.5kb_KP_rep2	1.5kb_KP_rep3	Average	Stdev
	ISO1	4.34285e-05	4.78043e-05	5.92399e-06	3.23856e-05	1.87963e-05
	Harwich	1	1	1	1	0
	HISR-D29	0.120742	0.411653	0.07	0.200798	0.150529
	HISR-D43	0.0734802	0.255342	0.297096	0.208639	0.0970801
	HISR-D46	0.0427332	0.189005	0.217638	0.149792	0.0765992
	HISR-D51	0.072268	0.194521	0.224533	0.163774	0.0658544
	HISR-N10	0.0940453	0.0736587	0.0479442	0.0718827	0.0188626
	HISR-N17	1.28222e-05	4.86206e-06	1.26237e-05	1.01027e-05	3.70655e-06
	HISR-N25	2.00505e-05	1.18726e-05	2.46253e-05	1.88495e-05	5.27506e-06
	HISR-N31	1.37854e-05	1.09024e-05	2.20861e-05	1.55913e-05	4.74096e-06

## Sheet: Fig5C-Har-P
				4th biological replicate
strain	Rp49_Ct1	Rp49_Ct2	Rp49_AvgCt	HarP-F2-R8_Ct1	HarP-F2-R8_Ct2	HarP Avg Ct	dCT	ddCT	HarP RQ	HarP RQ%
ISO1	19.261	19.645	19.453	29.958	30.192	30.075	10.622	17.576	5.11796e-06	5.11796e-06
Harwich	20.4	20.028	20.214	13.189	13.331	13.26	-6.954	0	1	1
HISR-D29	20.8	20.663	20.7315	13.771	14.27	14.0205	-6.711	0.243	0.844986	0.844986
HISR-D43	20.385	20.554	20.4695	14.263	14.303	14.283	-6.1865	0.7675	0.587435	0.587435
HISR-D46	19.959	19.941	19.95	14.635	14.488	14.5615	-5.3885	1.5655	0.337861	0.337861
HISR-D51	19.577	19.789	19.683	14.304	14.595	14.4495	-5.2335	1.7205	0.303444	0.303444
HISR-N10	20.115	20.102	20.1085	14.069	13.965	14.017	-6.0915	0.8625	0.549999	0.549999
HISR-N17	19.401	19.57	19.4855	14.096	14.156	14.126	-5.3595	1.5945	0.331137	0.331137
HISR-N25	19.561	19.49	19.5255	15.585	15.505	15.545	-3.9805	2.9735	0.127317	0.127317
HISR-N31	19.716	19.605	19.6605	14.297	14.463	14.38	-5.2805	1.6735	0.313492	0.313492
				1st biological replicate
strain	Rp49_Ct1	Rp49_Ct2	Rp49_AvgCt	HarP-F2-R8_Ct1	HarP-F2-R8_Ct2	HarP Avg Ct	dCT	ddCT	HarP RQ	HarP RQ%
ISO1	19.929	20.556	20.2425	29.17	29.17	29.17	8.9275	15.101	2.84542e-05	2.84542e-05
Harwich	19.184	19.653	19.4185	13.257	13.233	13.245	-6.1735	0	1	1
HISR-D29	19.33	20.356	19.843	13.976	13.906	13.941	-5.902	0.2715	0.828458	0.828458
HISR-D46	18.452	19.207	18.8295	14.895	14.352	14.6235	-4.206	1.9675	0.255696	0.255696
HISR-D51	19.336	19.751	19.5435	14.588	14.543	14.5655	-4.978	1.1955	0.436635	0.436635
HISR-N10	19.416	20.044	19.73	17.598	17.462	17.53	-2.2	3.9735	0.0636586	0.0636586
HISR-N17	19.004	19.271	19.1375	14.669	14.739	14.704	-4.4335	1.74	0.29937	0.29937
HISR-N25	19.122	19.674	19.398	16.452	17	16.726	-2.672	3.5015	0.0882965	0.0882965
HISR-N31	18.948	19.486	19.217	14.732	14.78	14.756	-4.461	1.7125	0.305131	0.305131
				2nd biological replicate
strain	rp49_rep2Ct1	rp49_rep2Ct2	Avg_rp49_rep2	HarP_rep2Ct1	HarP_rep2Ct2	Avg_HarP_rep2	deltaCT	ddCT	fold change	Har-P %
ISO1	18.233	17.818	18.0255	29.681	29.447	29.564	-11.5385	18.6435	2.44201e-06	2.44201e-06
Harwich	19.835	19.661	19.748	12.65	12.636	12.643	7.105	0	1	1
HISR-D29	21.091	21.102	21.0965	14.75	14.096	14.423	6.6735	0.4315	0.74149	0.74
HISR-D43	20.137	20.067	20.102	13.512	13.547	13.5295	6.5725	0.5325	0.691356	0.691356
HISR-D46	19.677	19.399	19.538	14.125	14.072	14.0985	5.4395	1.6655	0.315235	0.315235
HISR-D51	19.548	19.391	19.4695	13.947	14.008	13.9775	5.492	1.613	0.326918	0.326918
HISR-N10	19.619	19.732	19.6755	13.403	13.332	13.3675	6.308	0.797	0.575545	0.575545
HISR-N17	19.106	19.053	19.0795	13.422	13.365	13.3935	5.686	1.419	0.373971	0.373971
HISR-N25	19.157	19.061	19.109	15.052	15.128	15.09	4.019	3.086	0.117766	0.117766
HISR-N31	19.758	19.55	19.654	14.214	14.225	14.2195	5.4345	1.6705	0.314144	0.314144
				3rd biological replicate
strain	rp49_rep3Ct1	rp49_rep3Ct2	Avg_rp49_rep3	HarP_rep3Ct1	HarP_rep3Ct2	Avg_HarP_rep3	deltaCT	ddCT	fold change	Har-P %
ISO1	20.357	20.866	20.6115	30	30.368	30.184	-9.5725	16.323	1.2198e-05	1.2198e-05
Harwich	18.841	19.143	18.992	12.08	12.403	12.2415	6.7505	0	1	1
HISR-D29	19	19.103	19.0515	12.689	13	12.8445	6.207	0.5435	0.686104	0.62153
HISR-D43	20.097	20.035	20.066	14.012	14.248	14.13	5.936	0.8145	0.568606	0.568606
HISR-D46	19.444	19.64	19.542	14.53	14.909	14.7195	4.8225	1.928	0.262793	0.262793
HISR-D51	21	20.421	20.7105	15.454	15.3	15.377	5.3335	1.417	0.37449	0.37449
HISR-N10	18.908	19.071	18.9895	13.417	13.643	13.53	5.4595	1.291	0.408668	0.408668
HISR-N17	19.368	19.32	19.344	14.892	14.865	14.8785	4.4655	2.285	0.205185	0.205185
HISR-N25	19.294	19.3	19.297	15.416	15.359	15.3875	3.9095	2.841	0.139564	0.139564
HISR-N31	18.561	18.196	18.3785	12.956	13.113	13.0345	5.344	1.4065	0.377226	0.377226
strain	HarP RQ%_rep4	Har-P %_rep2	Har-P %_rep3	HarP RQ%_rep1	Avg HarP RQ%	Stdev
ISO1	5.11796e-06	2.44201e-06	1.2198e-05	2.84542e-05	1.2053e-05	1.01179e-05
Harwich	1	1	1	1	1	0
HISR-D29	0.844986	0.74	0.62153	0.828458	0.758743	0.0887085
HISR-D43	0.587435	0.691356	0.568606		0.615799	0.0539771
HISR-D46	0.337861	0.315235	0.262793	0.255696	0.292896	0.0346803
HISR-D51	0.303444	0.326918	0.37449	0.436635	0.360372	0.0509299
HISR-N10	0.549999	0.575545	0.408668	0.575545	0.527439	0.0693612
HISR-N17	0.331137	0.373971	0.205185	0.29937	0.302416	0.0620648
HISR-N25	0.127317	0.117766	0.139564	0.0882965	0.118236	0.0189338
HISR-N31	0.313492	0.314144	0.377226	0.305131	0.327498	0.0289293

## Sheet: Fig5D
		Full Length P	Longer P	KP-like variant	Har-P variant	Inconclusive	total
34	HISR-D51	6	2	3	16	7	34
36	HISR-D46	6	2	2	21	5	36
23	HISR-N10	0	2	1	16	3	22
15	HISR-N17	0	0	2	13	0	15
12	HISR-N25	0	0	2	7	3	12
22	HISR-N31	0	0	1	14	7	22
