# Supplementary material for: Har-P, a short P-element variant, weaponizes P-transposase to severely impair Drosophila development
Source: eLife. 2019 Dec 17;8:e49948. doi: 10.7554/eLife.49948 (PMC6917496; doi:10.7554/eLife.49948)
Supplement: Figure 6—figure supplement 1—source data 1. [file elife-49948-fig6-figsupp1-data1.xlsx]

## Sheet: Fig6S1A
		ISO1 x Har (Dys)	Har x ISO1 (Non)	error
	ORF2	1	0.5	0.05
	ORF3	1	0.7	0.1
	IVS3	1	0.03	0.01

## Sheet: Fig6S1B
		normalized copies/genome
	Cross	rep1	rep2	rep3			Avg
	Iso1 x Har_Carc	82.6214	54.1152	61.1966		ISO1 x Har Carcass	65.9777	14.8423
	Iso1 x Har_Ovary	62.0071	55.1867	45.1955		ISO1 x Har Ovary	54.1298	8.45549
	Har x Iso1_Carc	43.1396	54.9658	64.1646		Har x ISO1 Carcass	54.09	10.5399
	Har x Iso1_Ovary	52.8098	66.6667	48.9039		Har x ISO1 Ovary	56.1268	9.3344
	Iso1 x D51_Carc	14.3438	15.3902	14.6386		ISO1 x D51 Carcass	14.7909	0.539582
	Iso1 x D51_Ovary	13.7213	11.4286	18.0734		ISO1 x D51 Ovary	14.4077	3.37518
	D51 x Iso1_Carc	15.5207	15.2675	15.2658		D51 x ISO1 Carcass	15.3513	0.146688
	D51 x Iso1_Ovary	12.2673	12.8814	15		D51 x ISO1 Ovary	13.3829	1.43372
