# Supplementary material for: Har-P, a short P-element variant, weaponizes P-transposase to severely impair Drosophila development
Source: eLife. 2019 Dec 17;8:e49948. doi: 10.7554/eLife.49948 (PMC6917496; doi:10.7554/eLife.49948)
Supplement: Figure 6—source data 1. [file elife-49948-fig6-data1.xlsx]

## Sheet: Fig6B
	F1 ovarian atrophy assays
Date	Female in cross	Male in cross	F1 female with >2 eggs (fertile)	Dysgenic F1 females	% Dysgenic females	Avg % F1 dysgenesis	Notes
2018-11-14	H{CP-3}	Birm	13	10	0.434783	0.459327
2018-11-15	H{CP-3}	Birm	16	15	0.483871
2019-06-21	H{CP-3}	Harwich	0	55	1	1			Female in cross	Male in cross	Avg % F1 dysgenic females
2018-10-24	H{CP-3}	Harwich	0	78	1
2018-11-14	H{CP-3}	HISR-N10	9	63	0.875				P{Δ2-3, 99B}	ISO1	0.19
2018-10-24	H{CP-3}	HISR-N17	17	32	0.653061	0.540816			P{Δ2-3, 99B}	HISR-N10	1
2018-11-14	H{CP-3}	HISR-N17	8	6	0.428571				P{Δ2-3, 99B}	Harwich	1
2018-10-24	H{CP-3}	HISR-N25	11	7	0.388889	0.453987			P{Δ2-3, 99B}	OreR-MOD	0.24
2018-11-06	H{CP-3}	HISR-N25	21	38	0.644068
2018-11-14	H{CP-3}	HISR-N25	14	8	0.363636				[P(Δ2-3)]H	ISO1	0.05
2018-11-15	H{CP-3}	HISR-N25	18	13	0.419355				[P(Δ2-3)]H	HISR-N10	0.714286
2018-10-24	H{CP-3}	HISR-N31	6	25	0.806452	0.617512			[P(Δ2-3)]H	Harwich	1
2018-11-14	H{CP-3}	HISR-N31	48	36	0.428571				[P(Δ2-3)]H	OreR-MOD	0.2
2019-02-11	H{CP-3}	ISO1-UC	43	11	0.203704
2019-01-24	H{CP-3}	Lerick-SL2	48	11	0.186441	0.142401
2019-01-24	H{CP-3}	Lerick-SL2	55	6	0.0983607
2018-06-04	H{CP-3}	OreR-MOD	31	22	0.415094	0.208767
2018-11-14	H{CP-3}	OreR-MOD	53	5	0.0862069
2018-11-15	H{CP-3}	OreR-MOD	49	7	0.125
2019-01-24	H{CP-3}	pi[2]	7	50	0.877193
2018-10-24	yw	Birm	33	11	0.25
2018-07-11	yw	Harwich	0	29	1	1
2018-07-19	yw	Harwich	0	110	1
2018-10-10	yw	HISR-N10	38	9	0.191489	0.245745
2018-10-14	yw	HISR-N10	21	9	0.3
2018-10-10	yw	HISR-N17	27	3	0.1	0.106818
2018-10-14	yw	HISR-N17	39	5	0.113636
2018-10-10	yw	HISR-N25	24	5	0.172414	0.16204
2018-10-14	yw	HISR-N25	35	8	0.186047
2018-11-06	yw	HISR-N25	41	6	0.12766
2018-10-10	yw	HISR-N31	37	3	0.075	0.206731
2018-11-06	yw	HISR-N31	43	22	0.338462
2019-02-12	yw	Lerick-SL2	46	5	0.0980392	0.0990196
2019-02-12	yw	Lerick-SL2	72	8	0.1
2018-10-15	yw	OreR-MOD	41	11	0.211538	0.236352
2018-10-22	yw	OreR-MOD	8	5	0.384615
2019-02-12	yw	OreR-MOD	55	7	0.112903
