# Supplementary material for: Har-P, a short P-element variant, weaponizes P-transposase to severely impair Drosophila development
Source: eLife. 2019 Dec 17;8:e49948. doi: 10.7554/eLife.49948 (PMC6917496; doi:10.7554/eLife.49948)
Supplement: Figure 7—figure supplement 1—source data 2. [file elife-49948-fig7-figsupp1-data2.xlsx]

## Sheet: PL_D2-3 CP
Vial ID	Date of Assay	Female in Cross	Male in Cross	Visible Phenotype(s)	Numbe of Adults with Phenotype	Notes			number of dead pupae was calculated 16 days after fly introduction
2.1	20190930	#142 Delta 2-3 CP virgins	#126 RAL-377	red eyes	29
				peach/orange eyes	25					D2-3 CP × RAL-42	D2-3 CP × RAL-377	D2-3 CP × RAL-508	D2-3 CP × RAL-855	D2-3 CP × CP-KP	D2-3 CP × P{tubGal 80}Chr2	D2-3 CP × P{tubGal 80}Chr3	D2-3 CP × P{Elav-Gal4}Chr2
				white eyes	2	the only F1 progeny with white eyes			total number of emerged adults	13	386	188	422	295	194	291	173
									total number of dead pupae	330	89	22	5	24	7	12	2
2.2	20190930	#142 Delta 2-3 CP virgins	#126 RAL-377	red eyes	26				pupal lethality percentage	96.2099	18.7368	10.4762	1.17096	7.52351	3.48259	3.9604	1.14286
				peach/orange eyes	15
2.3	20190930	#142 Delta 2-3 CP virgins	#126 RAL-377	red eyes	44	all female
				peach/orange eyes	30	all male
										RAL-42	RAL-377	RAL-508	RAL-855	CP-KP	P{tubGal 80}Chr2	P{tubGal 80}Chr3	P{Elav-Gal4}Chr2
4.1	20191002	#142 Delta 2-3 CP virgins	#141 RAL-855	red eyes	54	all female, one had injured/enlarged black wing			pupal lethality percentage	96.2099	18.7368	10.4762	1.17096	7.52351	3.48259	3.9604	1.14286
				peach/orange eyes	42	all male
4.2	20191002	#142 Delta 2-3 CP virgins	#141 RAL-855	red eyes	34	all female
				peach/orange eyes	19	all male
4.3	20191002	#142 Delta 2-3 CP virgins	#141 RAL-855	red eyes	26	all female
				peach/orange eyes	28	all male
3.2	20191002	#142 Delta 2-3 CP virgins	#140 RAL-508	red eyes	25	all female
				peach/orange eyes	11	all male
3.3	20191002	#142 Delta 2-3 CP virgins	#140 RAL-508	red eyes	44	all female
				peach/orange eyes	40	all male
2.1	20191004	#142 Delta 2-3 CP virgins	#126 RAL-377	red eyes	11	all female
				peach/orange eyes	13	1 female, the rest were male
2.2	20191004	#142 Delta 2-3 CP virgins	#126 RAL-377	red eyes	5	1 male, the rest were female, 5 dead pupae
				peach/orange eyes	5	all male
2.3	20191004	#142 Delta 2-3 CP virgins	#126 RAL-377	red eyes	4	all female
				peach/orange eyes	7	all male
1.1	20191007	#142 Delta 2-3 CP virgins	#125 RAL-42	peach/orange eyes	4	all male, took very long to emerge, 88 dead pupae
1.2	20191007	#142 Delta 2-3 CP virgins	#125 RAL-42	red eyes	1	female, took very long to emerge, 40 dead pupae
				peach/orange eyes	3	all male, took very long to emerge
1.3	20191007	#142 Delta 2-3 CP virgins	#125 RAL-42	red eyes	2	female, took very long to emerge, 96 dead pupae
				peach/orange eyes	2	all male, took very long to emerge
2.1	20191007	#142 Delta 2-3 CP virgins	#126 RAL-377	red eyes	4	all female, 21 dead pupae
				peach/orange eyes	4	all male
2.3	20191007	#142 Delta 2-3 CP virgins	#126 RAL-377	red eyes	1	female, 23 dead pupae
3.2	20191007	#142 Delta 2-3 CP virgins	#140 RAL-508	red eyes	8	all female
				peach/orange eyes	14	all male
3.3	20191007	#142 Delta 2-3 CP virgins	#140 RAL-508	red eyes	20	all female, 12 dead pupae
				peach/orange eyes	22	all male
4.1	20191007	#142 Delta 2-3 CP virgins	#141 RAL-855	red eyes	32	all female
				peach/orange eyes	27	all male
4.2	20191007	#142 Delta 2-3 CP virgins	#141 RAL-855	red eyes	10	all female
				peach/orange eyes	17	all male
4.3	20191007	#142 Delta 2-3 CP virgins	#141 RAL-855	red eyes	22	all female, no dead pupae
				peach/orange eyes	32	all male
3.2	20191011	#142 Delta 2-3 CP virgins	#140 RAL-508	red eyes	11	all female, 5 dead pupae
				peach/orange eyes	10
4.1	20191011	#142 Delta 2-3 CP virgins	#141 RAL-855	red eyes	7	all female, 4 dead pupae
				peach/orange eyes	13	all male
4.2	20191011	#142 Delta 2-3 CP virgins	#141 RAL-855	red eyes	5	all female, 1 dead pupae
				peach/orange eyes	6	all male
5.1	20191015	#142 Delta 2-3 CP virgins	#143 y[1]	male	26	all have peach/orange eyes
				female	31	all have peach/orange eyes
5.2	20191015	#142 Delta 2-3 CP virgins	#143 y[1]	male	30	all have peach/orange eyes
				female	34	all have peach/orange eyes
5.3	20191015	#142 Delta 2-3 CP virgins	#143 y[1]	male	34	all have peach/orange eyes
				female	38	all have peach/orange eyes
5.1	20191017	#142 Delta 2-3 CP virgins	#143 y[1]	male	13	all have peach/orange eyes
				female	10	all have peach/orange eyes
5.2	20191017	#142 Delta 2-3 CP virgins	#143 y[1]	male	16	all have peach/orange eyes
				female	7	all have peach/orange eyes
5.3	20191017	#142 Delta 2-3 CP virgins	#143 y[1]	male	16	all have peach/orange eyes
				female	17	all have peach/orange eyes
5.1	20191018	#142 Delta 2-3 CP virgins	#143 y[1]	male	4	9 dead pupae
				female	4
5.2	20191018	#142 Delta 2-3 CP virgins	#143 y[1]	male	4	6 dead pupae
				female	2
5.3	20191018	#142 Delta 2-3 CP virgins	#143 y[1]	male	7	9 dead pupae
				female	2
2.4	20191018	#142 Delta 2-3 CP virgins	#126 RAL-377	male	5	all peach/orange eyes
				female	12	all red eyes
2.5	20191018	#142 Delta 2-3 CP virgins	#126 RAL-377	male	14	one male with red eyes
				female	19
2.6	20191018	#142 Delta 2-3 CP virgins	#126 RAL-377	male	7
				female	11
6.1	20191018	#142 Delta 2-3 CP virgins	#134 w[*]C1	male	13	all peach/orange eyes
				female	14	all peach/orange eyes
6.2	20191018	#142 Delta 2-3 CP virgins	#134 w[*]C1	female	8	no males
6.3	20191018	#142 Delta 2-3 CP virgins	#134 w[*]C1	male	17	all peach/orange eyes
				female	33	all peach/orange eyes
7.1	20191018	#142 Delta 2-3 CP virgins	#135 w[*]C2	male	14	all peach/orange eyes
				female	33	all peach/orange eyes
7.2	20191018	#142 Delta 2-3 CP virgins	#135 w[*]C2	male	42	all peach/orange eyes
				female	42	all peach/orange eyes
7.3	20191018	#142 Delta 2-3 CP virgins	#135 w[*]C2	male	13	all peach/orange eyes
				female	21	all peach/orange eyes
8.1	20191018	#142 Delta 2-3 CP virgins	#161 Elav-Gal4	male	6	all peach/orange eyes
				female	8	all red eyes
8.2	20191018	#142 Delta 2-3 CP virgins	#161 Elav-Gal4	male	12	all peach/orange eyes
				female	25	all red eyes
8.3	20191018	#142 Delta 2-3 CP virgins	#161 Elav-Gal4	male	6	all peach/orange eyes
				female	22	all red eyes
2.4	20191021	#142 Delta 2-3 CP virgins	#126 RAL-377	male	16	one male with red eyes, the rest were peach/orange
				female	12	all red eyes
2.5	20191021	#142 Delta 2-3 CP virgins	#126 RAL-377	male	17	one male with red eyes, the rest were peach/orange
				female	20	all red eyes
2.6	20191021	#142 Delta 2-3 CP virgins	#126 RAL-377	male	10	one male with red eyes, the rest were peach/orange
				female	13	all red eyes
6.1	20191021	#142 Delta 2-3 CP virgins	#134 w[*]C1	male	18	all peach/orange eyes, 3 dead pupae
				female	20	all peach/orange eyes
6.2	20191021	#142 Delta 2-3 CP virgins	#134 w[*]C1	male	14
				female	16
6.3	20191021	#142 Delta 2-3 CP virgins	#134 w[*]C1	male	19
				female	18
7.1	20191021	#142 Delta 2-3 CP virgins	#135 w[*]C2	male	13
				female	12
7.2	20191021	#142 Delta 2-3 CP virgins	#135 w[*]C2	male	18
				female	18
7.3	20191021	#142 Delta 2-3 CP virgins	#135 w[*]C2	male	31
				female	21
8.1	20191021	#142 Delta 2-3 CP virgins	#161 Elav-Gal4	male	20	one male with red eyes, the rest were peach/orange
				female	18	one female with peach/orange eyes, the rest were red
8.2	20191021	#142 Delta 2-3 CP virgins	#161 Elav-Gal4	male	11	all peach/orange eyes
				female	16	all red eyes
8.3	20191021	#142 Delta 2-3 CP virgins	#161 Elav-Gal4	male	17	one male with red eyes, the rest were peach/orange
				female	10	all red eyes, 1 dead pupae
2.4	20191023	#142 Delta 2-3 CP virgins	#126 RAL-377	male	1	no females, peach/orange eyes 15 dead pupae
2.5	20191023	#142 Delta 2-3 CP virgins	#126 RAL-377	male	2	one red eyes, one were peach/orange, 18 dead pupae
				female	1	red eyes
2.6	20191023	#142 Delta 2-3 CP virgins	#126 RAL-377	male	1	no females, all peach/orange eyes, 7 dead pupae
6.2	20191023	#142 Delta 2-3 CP virgins	#134 w[*]C1	male	2	all peach/orange eyes, 1 dead pupae
				female	1	all peach/orange eyes
6.3	20191023	#142 Delta 2-3 CP virgins	#134 w[*]C1	male	1	no females, all peach/orange eyes, 3 dead pupae
7.1	2019103	#142 Delta 2-3 CP virgins	#135 w[*]C2	male	1	no females, 4 dead pupae
7.2	20191023	#142 Delta 2-3 CP virgins	#135 w[*]C2	male	3	5 dead pupae
				female	8
7.3	20191023	#142 Delta 2-3 CP virgins	#135 w[*]C2	male	1	no females, 3 dead pupae
8.1	20191023	#142 Delta 2-3 CP virgins	#161 Elav-Gal4	male	1	no females, all peach/orange eyes, no dead pupae
8.2	20191023	#142 Delta 2-3 CP virgins	#161 Elav-Gal4	male	1	no females, 1 dead pupae
3.4	20191025	#142 Delta 2-3 CP virgins	#140 RAL-508	female	1
3.6	20191025	#142 Delta 2-3 CP virgins	#140 RAL-508	female	4
4.4	20191025	#142 Delta 2-3 CP virgins	#141 RAL-855	female	8
4.5	20191025	#142 Delta 2-3 CP virgins	#141 RAL-855	female	1	no dead pupae
4.6	20191025	#142 Delta 2-3 CP virgins	#141 RAL-855	male	4
				female	2
4.4	20191028	#142 Delta 2-3 CP virgins	#141 RAL-855	male	8	1 dead pupae
				female	2
4.5	20191028	#142 Delta 2-3 CP virgins	#141 RAL-855	male	8	one with red eyes, the rest were peach/orange
				female	3	one with peach/orange eyes, the rest were red
4.6	20191028	#142 Delta 2-3 CP virgins	#141 RAL-855	male	4	all peach/orange eyes, 1 dead pupae
				female	8	one with peach/orange eyes, the rest were red
3.4	20191028	#142 Delta 2-3 CP virgins	#140 RAL-508	male	1	all peach/orange eyes, 1 dead pupae
				female	1	all red eyes
3.5	20191028	#142 Delta 2-3 CP virgins	#140 RAL-508	male	6	one with red eyes, the rest were peach/orange
				female	1	all red eyes, 3 dead pupae
3.6	20191028	#142 Delta 2-3 CP virgins	#140 RAL-508	male	5	all peach/orange eyes
				female	3	all red eyes
1.5	20191031	#142 Delta 2-3 CP virgins	#125 RAL-42	male	1	peach/orange eyes, straight wings, 53 dead pupae
3.6	20191031	#142 Delta 2-3 CP virgins	#140 RAL-508	male	1	peach/orange eyes, 1 dead pupae
1.4	20191031	#142 Delta 2-3 CP virgins	#125 RAL-42	no life	all dead	53 dead pupae

## Sheet: PL_D2-3 99B
Vial ID	Date of Assay	Female in Cross	Male in Cross	Visible Phenotype(s)	Numbe of Adults with Phenotype	Notes			number of dead pupae was calculated 16 days after fly introduction
14.1	20191015	#139 Delta 2-3 99B virgins	#141 RAL-855	white eyes curly wings	3	all male
				white eyes straight wings	7	all male				D2-3 99B × RAL-42	D2-3 99B × RAL-377	D2-3 99B × RAL-508	D2-3 99B × RAL-855
				red eyes straight wings	12	all female			total number of emerged adults	0	220	47	276
				red eyes straight wings	11	all female			total number of dead pupae	228	76	96	7
									pupal lethality percentage	100	25.6757	67.1329	2.4735
14.2	20191015	#139 Delta 2-3 99B virgins	#141 RAL-855	male	16	all have white eyes
				female	29	all have red eyes
14.3	20191015	#139 Delta 2-3 99B virgins	#141 RAL-855	male	21	all have white eyes				RAL-42	RAL-377	RAL-508	RAL-855
				female	16	all have red eyes			pupal lethality percentage	100	25.6757	67.1329	2.4735
13.1	20191015	#139 Delta 2-3 99B virgins	#140 RAL-508	male	1	all have white eyes
				female	6	all have red eyes
13.2	20191015	#139 Delta 2-3 99B virgins	#140 RAL-508	male	1	all have white eyes
				female	6	all have red eyes
13.3	20191015	#139 Delta 2-3 99B virgins	#140 RAL-508	female	3	no males
12.1	20191015	#139 Delta 2-3 99B virgins	#126 RAL-377	male	9	all have white eyes
				female	21	all have red eyes
12.2	20191015	#139 Delta 2-3 99B virgins	#126 RAL-377	male	7	all have white eyes
				female	22	all have red eyes
12.3	20191015	#139 Delta 2-3 99B virgins	#126 RAL-377	male	9	all have white eyes
				female	22	all have red eyes
12.1	20191017	#139 Delta 2-3 99B virgins	#126 RAL-377	male	14
				female	11
12.2	20191017	#139 Delta 2-3 99B virgins	#126 RAL-377	male	13
				female	21
12.3	20191017	#139 Delta 2-3 99B virgins	#126 RAL-377	male	7
				female	16
13.1	20191017	#139 Delta 2-3 99B virgins	#140 RAL-508	male	1
				female	9
13.2	20191017	#139 Delta 2-3 99B virgins	#140 RAL-508	female	1	no males, 37 dead pupae
13.3	20191017	#139 Delta 2-3 99B virgins	#140 RAL-508	male	11
				female	14
14.1	20191017	#139 Delta 2-3 99B virgins	#141 RAL-855	male	19
				female	20
14.2	20191017	#139 Delta 2-3 99B virgins	#141 RAL-855	male	22
				female	27
14.3	20191017	#139 Delta 2-3 99B virgins	#141 RAL-855	male	19
				female	17
12.1	20191018	#139 Delta 2-3 99B virgins	#126 RAL-377	male	5
				female	3
12.2	20191018	#139 Delta 2-3 99B virgins	#126 RAL-377	male	4
				female	4
12.3	20191018	#139 Delta 2-3 99B virgins	#126 RAL-377	male	4
				female	1
11.1	20191021	#139 Delta 2-3 99B virgins	#125 RAL-42	no life	all dead	120 dead pupae
11.2	20191021	#139 Delta 2-3 99B virgins	#125 RAL-42	no life	all dead	108 dead pupae
12.1	20191021	#139 Delta 2-3 99B virgins	#126 RAL-377	male	4	33 dead pupae
				female	3
12.2	20191021	#139 Delta 2-3 99B virgins	#126 RAL-377	male	3	20 dead pupae
				female	9
12.3	20191021	#139 Delta 2-3 99B virgins	#126 RAL-377	male	1	23 dead pupae
				female	7
13.1	20191021	#139 Delta 2-3 99B virgins	#140 RAL-508	female	1	no males, 34 dead pupae
13.3	20191021	#139 Delta 2-3 99B virgins	#140 RAL-508	male	2	25 dead pupae
				female	1
14.1	20191021	#139 Delta 2-3 99B virgins	#141 RAL-855	male	10	no dead pupae
				female	7
14.2	20191021	#139 Delta 2-3 99B virgins	#141 RAL-855	male	12	6 dead pupae
				female	4
14.3	20191021	#139 Delta 2-3 99B virgins	#141 RAL-855	male	3	1 dead pupae
				female	1

## Sheet: GD_D2-3 CP
FLY OVARY SQUASH ASSAY RECORDING SHEET
Experimenter Name Jasmine Pierre		INSTRUCTIONS: 1) First record the vial ID, genotypes of females and males in the cross.	2) Use the Needle valve to use CO2 gas to anesthetize flies. 3) Sort out females only on flypad	4) Mark the cross name on glass slide. 5) Transfer 12-18 females to slide, spread out on bench only, AWAY from flypad		6) Immediately add 2-3 drops green food dye. 7) Carefully and completely squash flies with large coverslip. 8) Counts squashed flies for Fertile or Dysgenic females
Vial ID	Date of Fly Squash Assay	Female in Cross	Male in Cross	Visible PhenoType Marker?	Number with more than 2 Eggs (Fertile)	Number lacking any Eggs (Dysgenic)	Notes
EXAMPLE	Today's date	#33 Virgin Females TJ-Gal4 5/18	#62 Male TRiP shRtf1 5/18	Curly wing	10	2	They all look young
	''	''	''	Straight wing	1	4	Wait for 2nd hatching
skip a line in between each vial
									the original cross	D2-3 CP × RAL-42	D2-3 CP × RAL-377	D2-3 CP × RAL-508	D2-3 CP × RAL-855
4.1 - 4.3	20191004	#142 Delta 2-3 CP virgins	#141 RAL-855	red eyes, straight wings	107	7			total number of fertile females	0	19	86	107
									total number of dysgenic females	3	0	10	2
3.1 - 3.3	20191004	#142 Delta 2-3 CP virgins	#140 RAL-508	red eyes, straight wings	66	2			GD percentage	100	0	10.4167	1.83486
											↑ should be redone
2.1 - 2.3	20191004	#142 Delta 2-3 CP virgins	#126 RAL-377	red eyes, straight wings	19	0	done on white background, should be redone
									cross totals	D2-3 CP × RAL-42	D2-3 CP × RAL-377	D2-3 CP × RAL-508	D2-3 CP × RAL-855	D2-3 CP × CP-KP	D2-3 CP × P{tubGal90}Chr2	D2-3 CP × P{tubGal80}Chr3	D2-3 CP × P{Elav-Gal4}Chr2
1.1 - 1.3	20191007	#142 Delta 2-3 CP virgins	#125 RAL-42	red eyes, straight wings	0	3			total number of fertile females	0	21	93	128	189	103	150	94
									total number of dysgenic females	3	85	13	12	55	5	4	3
3.1 - 3.3	20191007	#142 Delta 2-3 CP virgins	#140 RAL-508	red eyes, straight wings	20	8			GD percentage	100	80.1887	12.2642	8.57143	22.541	4.62963	2.5974	3.09278
5.1 - 5.3	20191017	#142 Delta 2-3 CP virgins	#143 y[1]	peach/orange eye, straight wing	76	26
5.1 - 5.3	20191017	#142 Delta 2-3 CP virgins	#143 y[1]	peach/orange eye, straight wing	29	3
5.1 - 5.3	20191021	#142 Delta 2-3 CP virgins	#143 y[1]	peach/orange eye, straight wing	76	26				RAL-42	RAL-377	RAL-508	RAL-855	CP-KP	P{tubGal90}Chr2	P{tubGal80}Chr3	P{Elav-Gal4}Chr2
									GD percentage	100	80.1887	12.2642	8.57143	22.541	4.62963	2.5974	3.09278
2.4 - 2.6	20191023	#142 Delta 2-3 CP virgins	#126 RAL-377	red eyes, straight wings	1	41
									graph made using data from 'cross totals'
6.1 - 6.3	20191023	#142 Delta 2-3 CP virgins	#134 w[*] C1	peach/orange eye, straight wing	52	1
7.1 - 7.3	20191023	#142 Delta 2-3 CP virgins	#135 w[*] C2	peach/orange eye, straight wing	92	3
8.1 - 8.3	20191023	#142 Delta 2-3 CP virgins	#161 Elav-Gal4	red/orange eye, curly and straight wings	54	0
5.1 - 5.3	20191024	#142 Delta 2-3 CP virgins	#143 y[1]	peach/orange eye, straight wing	8	0
									data collected since being more strict with what is considered fertile STARTING 20191007 must have 4 or more eggs to be fertile
2.4 - 2.6	20191025	#142 Delta 2-3 CP virgins	#126 RAL-377	red eyes, straight wings	1	43				D2-3 CP × RAL-42	D2-3 CP × RAL-377	D2-3 CP × RAL-508	D2-3 CP × RAL-855	D2-3 CP × CP-KP	D2-3 CP × P{tubGal90}Chr2	D2-3 CP × P{tubGal80}Chr3	D2-3 CP × P{Elav-Gal4}Chr2
									total number of fertile females	0	2	7	21	189	103	150	94
6.1 - 6.3	20191025	#142 Delta 2-3 CP virgins	#134 w[*] C1	peach/orange eye, straight wing	51	3			total number of dysgenic females	0	85	3	5	55	5	4	3
									GD percentage	N/A	97.7011	30	19.2308	22.541	4.62963	2.5974	3.09278
7.1 - 7.3	20191025	#142 Delta 2-3 CP virgins	#135 w[*] C2	peach/orange eye, straight wing	50	1
8.1 - 8.3	20191025	#142 Delta 2-3 CP virgins	#161 Elav-Gal4	red/orange eye, curly and straight wings	40	3
2.4 - 2.6	20191029	#142 Delta 2-3 CP virgins	#126 RAL-377	red eyes, straight wings	0	1
7.1 - 7.3	20191029	#142 Delta 2-3 CP virgins	#134 w[*] C1	peach/orange eye, straight wing	0	1
8.1 - 8.3	20191029	#142 Delta 2-3 CP virgins	#135 w[*] C2	red/orange eye, curly and straight wings	8	0
3.3 - 3.6	20191030	#142 Delta 2-3 CP virgins	#140 RAL-508	red eyes, straight wings	7	3
4.4 - 4.6	20191030	#142 Delta 2-3 CP virgins	#141 RAL-855	red eyes, straight wings	9	2
4.4 - 4.6	20191101	#142 Delta 2-3 CP virgins	#141 RAL-855	red eyes, straight wings	12	3

## Sheet: GD_D2-3 99B
FLY OVARY SQUASH ASSAY RECORDING SHEET
Experimenter Name Jasmine Pierre		INSTRUCTIONS: 1) First record the vial ID, genotypes of females and males in the cross.	2) Use the Needle valve to use CO2 gas to anesthetize flies. 3) Sort out females only on flypad	4) Mark the cross name on glass slide. 5) Transfer 12-18 females to slide, spread out on bench only, AWAY from flypad		6) Immediately add 2-3 drops green food dye. 7) Carefully and completely squash flies with large coverslip. 8) Counts squashed flies for Fertile or Dysgenic females
Vial ID	Date of Fly Squash Assay	Female in Cross	Male in Cross	Visible PhenoType Marker?	Number with more than 2 Eggs (Fertile)	Number lacking any Eggs (Dysgenic)	Notes
EXAMPLE	Today's date	#33 Virgin Females TJ-Gal4 5/18	#62 Male TRiP shRtf1 5/18	Curly wing	10	2	They all look young
	''	''	''	Straight wing	1	4	Wait for 2nd hatching			D2-3 99B × RAL-42	D2-3 99B × RAL-377	D2-3 99B × RAL-508	D2-3 99B × RAL-855
skip a line in between each vial									total number of fertile females	0	3	6	67
									total number of dysgenic females	0	126	35	71
12.1 - 12.3	20191018	#139 Delta 2-3 99B virgins	#126 RAL-377	red eyes, some curly some straight wings	1	60			GD percentage	100	97.6744	85.3659	51.4493
13.1 - 13.3	20191018	#139 Delta 2-3 99B virgins	#140 RAL-508	red eyes, some curly some straight wings	3	12	They all looked young/underdeveloped.
										RAL-42	RAL-377	RAL-508	RAL-855
14.1 - 14.3	20191018	#139 Delta 2-3 99B virgins	#141 RAL-855	red eyes, some curly some straight wings	1	3	They all looked young/underdeveloped.		GD percentage	100	97.6744	85.3659	51.4493
14.1 - 14.3	20191021	#139 Delta 2-3 99B virgins	#141 RAL-855	red eyes, some curly some straight wings	36	23
12.1 - 12.3	20191022	#139 Delta 2-3 99B virgins	#126 RAL-377	red eyes, some curly some straight wings	1	45
13.1 - 13.3	20191022	#139 Delta 2-3 99B virgins	#140 RAL-508	red eyes, some curly some straight wings	3	21	Some looked unusually old (maybe injured) for only 4 days old.
14.1 - 14.3	20191022	#139 Delta 2-3 99B virgins	#141 RAL-855	red eyes, some curly some straight wings	21	27
12.1 - 12.3	20191023	#139 Delta 2-3 99B virgins	#126 RAL-377	red eyes, some curly some straight wings	0	8
14.1 - 14.3	20191024	#139 Delta 2-3 99B virgins	#141 RAL-855	red eyes, some curly some straight wings	6	9
13.1 - 13.3	20191025	#139 Delta 2-3 99B virgins	#140 RAL-508	red eyes, some curly some straight wings	0	2
12.1 - 12.3	20191025	#139 Delta 2-3 99B virgins	#126 RAL-377	red eyes, some curly some straight wings	1	13
14.1 - 14.3	20191025	#139 Delta 2-3 99B virgins	#141 RAL-855	red eyes, some curly some straight wings	3	9
