# Supplementary material for: Har-P, a short P-element variant, weaponizes P-transposase to severely impair Drosophila development
Source: eLife. 2019 Dec 17;8:e49948. doi: 10.7554/eLife.49948 (PMC6917496; doi:10.7554/eLife.49948)
Supplement: Figure 7—figure supplement 2—source data 1. [file elife-49948-fig7-figsupp2-data1.xlsx]

## Sheet: Fig7S1A
				P-element IVS3 splicing normalized to Dmel_rp49
		Cross	Tissue	rp49_Ct1	rp49_Ct2	rp49_Ct3	rp49_AvgCt	rp49_Stdev	IVS3_Ct1	IVS3_Ct2	IVS3_Ct3	IVS3_AvgCt	IVS3_Stdev	dCt	ddCt	Fold Change	StDev prop1	StDev prop2				Fold change	std Error
	10	delta2-3 x Har	carc	18	17.855	16.974	17.6097	0.453365	26.66	27.147	26.98	26.929	0.202061	9.31933	0.842333	0.557741	0.525252	0.694838		IVS3-carc	delta2-3	1
	8	yw x Har	carc	17.995	17.897	17.058	17.65	0.420515	26.287	26.399	26.434	26.3733	0.0626968	8.72333	0.246333	0.843036	0.458568	0.727708		IVS3-carc	delta2-3 x Har	0.557741	0.694838
	6	delta2-3 x HISR-D 51	carc	18.091	17.891	17.157	17.713	0.40154	29.283	29.6	29.599	29.494	0.1492	11.781	3.304	0.10125	0.461537	0.726212		IVS3-carc	yw x Har	0.843036	0.727708
	4	yw x HISR-D 51	carc	18.606	18.148	17.463	18.0723	0.469685	28.11	28.151	28.108	28.123	0.0198158	10.0507	1.57367	0.335953	0.500518	0.706853		IVS3-carc	delta2-3 x HISR-D 51	0.10125	0.726212
	2	delta2-3	carc	18.505	18.115	18.173	18.2643	0.171816	26.652	26.726	26.846	26.7413	0.0799389	8.477	0	1				IVS3-carc	yw x HISR-D 51	0.335953	0.706853
		Cross	Tissue	rp49_Ct1	rp49_Ct2	rp49_Ct3	rp49_AvgCt	rp49_Stdev	IVS3_Ct1	IVS3_Ct2	IVS3_Ct3	IVS3_AvgCt	IVS3_Stdev	dCt	ddCt	Fold Change
	9	delta2-3 x Har	ovary	16.153	15.689	15.03	15.624	0.460761	23.143	23.404	23.405	23.3173	0.123273	7.69333	-4.78167	27.5059	0.479334	0.717308		IVS3-ovary	delta2-3	1
	7	yw x Har	ovary	14.782	14.488	14.095	14.455	0.281436	20.627	20.842	20.983	20.8173	0.146379	6.36233	-6.11267	69.1984	0.320776	0.800639		IVS3-ovary	delta2-3 x Har	27.5059	0.717308
	5	delta2-3 x HISR-D 51	ovary	15.878	15.407	15.027	15.4373	0.348081	23.434	23.448	23.622	23.5013	0.0855154	8.064	-4.411	21.2737	0.361577	0.778313		IVS3-ovary	yw x Har	69.1984	0.800639
	3	yw x HISR-D 51	ovary	16.124	16.226	15.602	15.984	0.273306	22.554	22.895	23	22.8163	0.190386	6.83233	-5.64267	49.9588	0.336463	0.79198		IVS3-ovary	delta2-3 x HISR-D 51	21.2737	0.778313
	1	delta2-3	ovary	16.75	16.655	16.644	16.683	0.0475885	29.186	28.94	29.348	29.158	0.167738	12.475	0	1				IVS3-ovary	yw x HISR-D 51	49.9588	0.79198
				P-element ORF-2 normalized to Dmel_rp49																ORF2-carc	delta2-3	1
		Cross	Tissue	rp49_Ct1	rp49_Ct2	rp49_Ct3	rp49_AvgCt	rp49_Stdev	ORF-2_Ct1	ORF3_Ct2	ORF-2_Ct3	ORF-2_AvgCt	ORF-2_Stdev	dCt	ddCt	Fold Change				ORF2-carc	delta2-3 x Har	110.61	0.693025
	10	delta2-3 x Har	carc	18	17.855	16.974	17.6097	0.453365	20.077	19.627	20.075	19.9263	0.211662	2.31667	-6.78933	110.61	0.52902	0.693025		ORF2-carc	yw x Har	223.48	0.680715
	8	yw x Har	carc	17.995	17.897	17.058	17.65	0.420515	19.113	18.507	19.236	18.952	0.318644	1.302	-7.804	223.48	0.554876	0.680715		ORF2-carc	delta2-3 x HISR-D 51	10.9384	0.723292
	6	delta2-3 x HISR-D 51	carc	18.091	17.891	17.157	17.713	0.40154	23.561	23.155	23.387	23.3677	0.166312	5.65467	-3.45133	10.9384	0.467349	0.723292		ORF2-carc	yw x HISR-D 51	28.8934	0.69695
	4	yw x HISR-D 51	carc	18.606	18.148	17.463	18.0723	0.469685	22.518	22.166	22.293	22.3257	0.145548	4.25333	-4.85267	28.8934	0.520874	0.69695
	2	delta2-3	carc	18.505	18.115	18.173	18.2643	0.171816	27.739	27.119	27.253	27.3703	0.266365	9.106	0	1				ORF2-ovary	delta2-3	1
		Cross	Tissue	rp49_Ct1	rp49_Ct2	rp49_Ct3	rp49_AvgCt	rp49_Stdev	ORF-2_Ct1	ORF3_Ct2	ORF-2_Ct3	ORF-2_AvgCt	ORF-2_Stdev	dCt	ddCt	Fold Change				ORF2-ovary	delta2-3 x Har	196.221	0.715923
	9	delta2-3 x Har	ovary	16.153	15.689	15.03	15.624	0.460761	21.083	20.843	21.156	21.0273	0.133707	5.40333	-7.61633	196.221	0.482123	0.715923		ORF2-ovary	yw x Har	520.108	0.751043
	7	yw x Har	ovary	14.782	14.488	14.095	14.455	0.281436	18.535	18.052	18.769	18.452	0.29854	3.997	-9.02267	520.108	0.413033	0.751043		ORF2-ovary	delta2-3 x HISR-D 51	142.386	0.756141
	5	delta2-3 x HISR-D 51	ovary	15.878	15.407	15.027	15.4373	0.348081	21.546	21.061	21.303	21.3033	0.198001	5.866	-7.15367	142.386	0.403273	0.756141		ORF2-ovary	yw x HISR-D 51	301.497	0.768678
	3	yw x HISR-D 51	ovary	16.124	16.226	15.602	15.984	0.273306	21.122	20.51	20.671	20.7677	0.259029	4.78367	-8.236	301.497	0.379548	0.768678
	1	delta2-3	ovary	16.75	16.655	16.644	16.683	0.0475885	30	29.749	29.359	29.7027	0.26373	13.0197	0	1				ORF3-carc	delta2-3	1
																				ORF3-carc	delta2-3 x Har	198.18	0.702114
				P-element ORF-3 normalized to Dmel_rp49																ORF3-carc	yw x Har	408.446	0.72834
		Cross	Tissue	rp49_Ct1	ORF3_Ct2	rp49_Ct3	rp49_AvgCt	rp49_Stdev	ORF-3_Ct1	ORF3_Ct2	ORF-3_Ct3	ORF-3_AvgCt	ORF-3_Stdev	dCt	ddCt	Fold Change				ORF3-carc	delta2-3 x HISR-D 51	408.446	0.73837
	10	delta2-3 x Har	carc	18	17.855	16.974	17.6097	0.453365	18.478	18.357	18.738	18.5243	0.158956	0.914667	-7.63067	198.18	0.510223	0.702114		ORF3-carc	yw x HISR-D 51	88.8315	0.706324
	8	yw x Har	carc	17.995	17.897	17.058	17.65	0.420515	17.448	17.546	17.57	17.5213	0.052772	-0.128667	-8.674	408.446	0.457317	0.72834
	6	delta2-3 x HISR-D 51	carc	18.091	17.891	17.157	17.713	0.40154	21.304	21.245	21.249	21.266	0.0269196	3.553	-8.674	408.446	0.437585	0.73837		ORF3-ovary	delta2-3	1
	4	yw x HISR-D 51	carc	18.606	18.148	17.463	18.0723	0.469685	20.153	20.094	20.187	20.1447	0.0384216	2.07233	-6.473	88.8315	0.501599	0.706324		ORF3-ovary	delta2-3 x Har	261.621	0.717936
	2	delta2-3	carc	18.505	18.115	18.173	18.2643	0.171816	26.844	26.705	26.88	26.8097	0.0754557	8.54533	0	1				ORF3-ovary	yw x Har	682.491	0.816982
		Cross	Tissue	rp49_Ct1	rp49_Ct2	rp49_Ct3	rp49_AvgCt	rp49_Stdev	ORF-3_Ct1	ORF3_Ct2	ORF-3_Ct3	ORF-3_AvgCt	ORF-3_Stdev	dCt	ddCt	Fold Change				ORF3-ovary	delta2-3 x HISR-D 51	176.967	0.779901
	9	delta2-3 x Har	ovary	16.153	15.689	15.03	15.624	0.460761	19.756	20.033	19.968	19.919	0.118274	4.295	-8.03133	261.621	0.478073	0.717936		ORF3-ovary	yw x HISR-D 51	297.278	0.816839
	7	yw x Har	ovary	14.782	14.488	14.095	14.455	0.281436	17.283	17.398	17.419	17.3667	0.0597792	2.91167	-9.41467	682.491	0.291623	0.816982
	5	delta2-3 x HISR-D 51	ovary	15.878	15.407	15.027	15.4373	0.348081	20.279	20.218	20.392	20.2963	0.0720848	4.859	-7.46733	176.967	0.358638	0.779901
	3	yw x HISR-D 51	ovary	16.124	16.226	15.602	15.984	0.273306	20	20.067	20.217	20.0947	0.0907242	4.11067	-8.21567	297.278	0.291876	0.816839
	1	delta2-3	ovary	16.75	16.655	16.644	16.683	0.0475885	28.886	28.929	29.213	29.0093	0.14508	12.3263	0	1

## Sheet: Fig7S1B
		F1 Pupal lethality
VIAL ID	Date	Female in cross	Male in cross	F1 group I marker	Empty pupae/ eclosed flies	Dead pupae	F1 group II marker	Empty pupae/ eclosed flies	Dead pupae	Total Pupae
rep1	2019-06-05	[P(Δ2-3)]H	N17-II/CyO; TM6/Sb	CyO	15	33	No CyO	0	49	97
rep2	2019-06-05	[P(Δ2-3)]H	N17-II/CyO; TM6/Sb	CyO	29	36	No CyO	0	65	130
rep3	2019-06-05	[P(Δ2-3)]H	N17-II/CyO; TM6/Sb	CyO	17	30	No CyO	0	47	94
rep1	2019-06-05	[P(Δ2-3)]H	CyO/Sp; N17-III/TM6	TM6b	21	23	No TM6b	7	37	88
rep2	2019-06-05	[P(Δ2-3)]H	CyO/Sp; N17-III/TM6	TM6b	35	22	No TM6b	8	49	114
rep3	2019-06-05	[P(Δ2-3)]H	CyO/Sp; N17-III/TM6	TM6b	35	9	No TM6b	18	26	99
			Assay Type1 (Individual HISR-N17 Chr)
		Genotype	Empty Pupae - aka Live Flies
rep1	CyO	CyO_rep1	15
rep2	CyO	CyO_rep2	29
rep3	CyO	CyO_rep3	17
rep1	N-17-II	N-17-II_rep1	0
rep2	N-17-II	N-17-II_rep2	0
rep3	N-17-II	N-17-II_rep3	0
rep1	TM6b	TM6b_rep1	21
rep2	TM6b	TM6b_rep2	35
rep3	TM6b	TM6b_rep3	35
rep1	N-17-III	N-17-III _rep1	7
rep2	N-17-III	N-17-III _rep2	8
rep3	N-17-III	N-17-III _rep3	18
			Average (Empty Pupae)	StdDev
		CyO	20.3333	7.57188
		N-17-II	0	0
		TM6b	30.3333	8.0829
		N-17-III	11	6.08276
