# Supplementary material for: Har-P, a short P-element variant, weaponizes P-transposase to severely impair Drosophila development
Source: eLife. 2019 Dec 17;8:e49948. doi: 10.7554/eLife.49948 (PMC6917496; doi:10.7554/eLife.49948)
Supplement: Figure 7—source data 1. [file elife-49948-fig7-data1.xlsx]

## Sheet: Fig7A-P{Δ2-3, 99B}
									female parent	Male parent	avg % pupal lethality
Date	Female in cross	Male in cross	Empty pupae	Dead pupae	% Pupal lethality	Average pupal lethality	Notes		P{Δ2-3, 99B}	ISO1	0.08
									P{Δ2-3, 99B}	Harwich	0.077
2018-11-23	P{Δ2-3, 99B}	Birm	3	73	0.960526	0.958835			P{Δ2-3, 99B}	HISR-N10	0.166
2018-12-18	P{Δ2-3, 99B}	Birm	3	67	0.957143				P{Δ2-3, 99B}	HISR-N17	1
2019-06-21	P{Δ2-3, 99B}	Harwich	83	5	0.0568182	0.0765319			P{Δ2-3, 99B}	HISR-N25	0.96
2019-01-02	P{Δ2-3, 99B}	Harwich	94	13	0.121495				P{Δ2-3, 99B}	HISR-N31	1
2019-01-07	P{Δ2-3, 99B}	Harwich	37	2	0.0512821				P{Δ2-3, 99B}	Birm	0.959
2019-01-02	P{Δ2-3, 99B}	HISR-D29	86	2	0.0227273	0.0793096			P{Δ2-3, 99B}	HISR-D29	0.079
2019-01-07	P{Δ2-3, 99B}	HISR-D29	64	14	0.179487				P{Δ2-3, 99B}	HISR-D43	0.119
2019-01-26	P{Δ2-3, 99B}	HISR-D29	81	3	0.0357143				P{Δ2-3, 99B}	HISR-D46	0.114
2019-01-02	P{Δ2-3, 99B}	HISR-D43	61	10	0.140845	0.119034			P{Δ2-3, 99B}	HISR-D51	0.1
2019-01-26	P{Δ2-3, 99B}	HISR-D43	65	7	0.0972222				P{Δ2-3, 99B}	pi[2]	0.132
2019-01-07	P{Δ2-3, 99B}	HISR-D46	58	10	0.147059	0.113912			P{Δ2-3, 99B}	OreR-MOD	0.214
2019-01-16	P{Δ2-3, 99B}	HISR-D46	108	15	0.121951				P{Δ2-3, 99B}	Lk-P(1A)	0.0208333
2019-01-26	P{Δ2-3, 99B}	HISR-D46	51	4	0.0727273
2019-01-02	P{Δ2-3, 99B}	HISR-D51	90	11	0.108911	0.100374
2019-01-26	P{Δ2-3, 99B}	HISR-D51	89	9	0.0918367
2019-01-02	P{Δ2-3, 99B}	HISR-N10	102	28	0.215385	0.165832
2019-01-26	P{Δ2-3, 99B}	HISR-N10	38	5	0.116279
2019-01-02	P{Δ2-3, 99B}	HISR-N17	0	37	1	1
2019-01-16	P{Δ2-3, 99B}	HISR-N17	0	35	1
2019-01-26	P{Δ2-3, 99B}	HISR-N17	0	40	1
2019-01-03	P{Δ2-3, 99B}	HISR-N25	11	73	0.869048	0.956349
2019-01-26	P{Δ2-3, 99B}	HISR-N25	0	90	1
2019-01-26	P{Δ2-3, 99B}	HISR-N25	0	109	1
2019-01-26	P{Δ2-3, 99B}	HISR-N31	0	66	1	1
2019-12-29	P{Δ2-3, 99B}	HISR-N31	0	76	1
2018-12-18	P{Δ2-3, 99B}	Lerik-SL2	47	1	0.0208333	0.0362787
2019-01-26	P{Δ2-3, 99B}	Lerik-SL2	55	3	0.0517241
2019-01-02	P{Δ2-3, 99B}	OreR-MOD	120	7	0.0551181	0.213514
2019-06-19	P{Δ2-3, 99B}	OreR-MOD	54	22	0.289474
2019-06-19	P{Δ2-3, 99B}	OreR-MOD	79	30	0.275229
2019-06-21	P{Δ2-3, 99B}	OreR-MOD	85	26	0.234234
2018-12-18	P{Δ2-3, 99B}	pi[2]	164	22	0.11828	0.132311
2019-06-21	P{Δ2-3, 99B}	pi[2]	105	18	0.146341
2019-06-21	P{Δ2-3, 99B}	ISO1-UC	103	6	0.0550459	0.0726964
2019-01-26	P{Δ2-3, 99B}	ISO1-UC	50	0	0
2019-01-30	P{Δ2-3, 99B}	ISO1-UC	77	15	0.163043

## Sheet:  Fig7A-P(Δ2-3) H
										Male parent	avg % pupal lethality
Date	Female in cross	Male in cross	Empty pupae	Dead pupae	% Pupal lethality	Average pupal lethality	Notes		[P(Δ2-3)]H	ISO1	0.0462
									[P(Δ2-3)]H	Harwich	0.0396
2019-06-21	[P(Δ2-3)]H	Birmingham	1	75	0.986842	1			[P(Δ2-3)]H	HISR-N10	0.119512
2018-11-08	[P(Δ2-3)]H	Birmingham	0	60	1				[P(Δ2-3)]H	HISR-N17	0.973
2018-11-07	[P(Δ2-3)]H	Harwich	86	2	0.0227273	0.039627			[P(Δ2-3)]H	HISR-N25	0.886
2018-11-08	[P(Δ2-3)]H	Harwich	109	8	0.0683761				[P(Δ2-3)]H	HISR-N31	0.988701
2019-06-21	[P(Δ2-3)]H	Harwich	70	2	0.0277778				[P(Δ2-3)]H	Birm	1
2019-01-24	[P(Δ2-3)]H	HISR-D29	136	6	0.0422535	0.0432507			[P(Δ2-3)]H	pi[2]	0.0431818
2019-01-26	[P(Δ2-3)]H	HISR-D29	108	5	0.0442478				[P(Δ2-3)]H	HISR-D29	0.0432507
2019-01-24	[P(Δ2-3)]H	HISR-D43	112	3	0.026087	0.0362993			[P(Δ2-3)]H	HISR-D43	0.0362993
2019-01-26	[P(Δ2-3)]H	HISR-D43	123	6	0.0465116				[P(Δ2-3)]H	HISR-D46	0.044
2019-01-24	[P(Δ2-3)]H	HISR-D46	106	5	0.045045	0.0445309			[P(Δ2-3)]H	HISR-D51	0.0915
2019-01-26	[P(Δ2-3)]H	HISR-D46	101	3	0.0288462				[P(Δ2-3)]H	OreR-MOD	0.231375
2019-06-21	[P(Δ2-3)]H	HISR-D46	63	4	0.0597015				[P(Δ2-3)]H	Lk-P(1A)	0.0253337
2019-06-21	[P(Δ2-3)]H	HISR-D51	75	13	0.147727	0.0915456
2019-01-24	[P(Δ2-3)]H	HISR-D51	77	5	0.0609756
2019-01-26	[P(Δ2-3)]H	HISR-D51	85	6	0.0659341
2019-01-02	[P(Δ2-3)]H	HISR-N10	106	21	0.165354	0.119512
2019-12-29	[P(Δ2-3)]H	HISR-N10	84	4	0.0454545
2019-06-19	[P(Δ2-3)]H	HISR-N10	75	13	0.147727
2018-10-30	[P(Δ2-3)]H	HISR-N17	0	98	1	0.973451
2018-11-16	[P(Δ2-3)]H	HISR-N17	6	107	0.946903
2018-11-16	[P(Δ2-3)]H	HISR-N25	17	113	0.869231	0.885703
2019-01-02	[P(Δ2-3)]H	HISR-N25	14	70	0.833333
2019-12-29	[P(Δ2-3)]H	HISR-N25	1	21	0.954545
2018-11-08	[P(Δ2-3)]H	HISR-N31	0	110	1	0.988701
2018-11-08	[P(Δ2-3)]H	HISR-N31	0	128	1
2019-12-29	[P(Δ2-3)]H	HISR-N31	2	57	0.966102
2019-01-26	[P(Δ2-3)]H	ISO1-UC	64	3	0.0447761	0.0462493
2019-01-30	[P(Δ2-3)]H	ISO1-UC	55	5	0.0833333
2019-06-21	[P(Δ2-3)]H	ISO1-UC	93	1	0.0106383
2019-01-24	[P(Δ2-3)]H	Lerick-SL2	101	2	0.0194175	0.0253337
2019-01-26	[P(Δ2-3)]H	Lerick-SL2	93	3	0.03125
2018-11-07	[P(Δ2-3)]H	OreR-MOD	79	31	0.281818	0.231375
2018-11-08	[P(Δ2-3)]H	OreR-MOD	93	29	0.237705
2018-11-23	[P(Δ2-3)]H	OreR-MOD	52	11	0.174603
2019-01-24	[P(Δ2-3)]H	pi[2]	53	2	0.0363636	0.0431818
2019-01-26	[P(Δ2-3)]H	pi[2]	76	4	0.05

## Sheet: Fig7B
Date	Female in cross	Male in cross	F1 female with >2 eggs (fertile)	Dysgenic F1 females	% Dysgenic females	Avg % F1 dysgenesis	Notes
2019-06-19	[P(Δ2-3)]H	HISR-N10	0	41	1	0.855769
2018-10-24	[P(Δ2-3)]H	HISR-N10	15	37	0.711538
2018-10-24	[P(Δ2-3)]H	Harwich	0	31	1	1
2019-06-21	[P(Δ2-3)]H	Harwich	0	42	1
2019-06-21	[P(Δ2-3)]H	ISO1-UC	43	9	0.173077	0.110348
2019-01-30	[P(Δ2-3)]H	ISO1-UC	40	2	0.047619
2019-06-19	[P(Δ2-3)]H	OreR-MOD	43	7	0.14	0.198791
2019-06-19	[P(Δ2-3)]H	OreR-MOD	52	10	0.16129
2019-06-19	[P(Δ2-3)]H	OreR-MOD	43	18	0.295082
2019-06-19	P{Δ2-3, 99B}	Harwich	0	39	1	1
2019-01-26	P{Δ2-3, 99B}	Harwich	0	61	1
2019-01-24	P{Δ2-3, 99B}	HISR-N10	0	18	1	1
2019-01-30	P{Δ2-3, 99B}	HISR-N10	0	29	1
2019-06-21	P{Δ2-3, 99B}	ISO1-UC	24	5	0.172414	0.184295
2019-01-26	P{Δ2-3, 99B}	ISO1-UC	40	14	0.259259
2019-01-30	P{Δ2-3, 99B}	ISO1-UC	29	4	0.121212
2019-06-19	P{Δ2-3, 99B}	OreR-MOD	13	6	0.315789	0.244851
2019-06-19	P{Δ2-3, 99B}	OreR-MOD	19	4	0.173913
	Other additional crosses not in the figure
Date	Female in cross	Male in cross	F1 female with >2 eggs (fertile)	Dysgenic F1 females	% Dysgenic females	Avg % F1 dysgenesis	Notes
2019-01-24	[P(Δ2-3)]H	pi[2]	5	57	0.919355
2019-01-30	P{Δ2-3, 99B}	Lerik-SL2	32	9	0.219512
2019-01-26	P{Δ2-3, 99B}	HISR-D29	0	78	1
2019-01-26	P{Δ2-3, 99B}	HISR-D51	0	88	1
