# Supplementary material for: Har-P, a short P-element variant, weaponizes P-transposase to severely impair Drosophila development
Source: eLife. 2019 Dec 17;8:e49948. doi: 10.7554/eLife.49948 (PMC6917496; doi:10.7554/eLife.49948)
Supplement: Supplementary file 1. [file elife-49948-supp1.xls]

## Sheet: Aug 17- Feb 18
TABLE S1 Oligonucleotides used in this study
Oligo Name	Forward	Reverse	Purpose
DmPele7a	TGAGTTAATTCAAACCCCACGGA	AAGAGACATCCACTTAACGTA	135 bp from extreme 3' end of all P-element structural variants; used for qPCR
DmRp49	ATGACCATCCGCCCAGCATAC	CTGCATGAGCAGGACCTCCAG	332bp amplicon in qPCR
Dm-HarP	AAACATTAACCCTTACGAGGTGT	GAGTGTCGTATTGAGTCTGAGTGA	412bp amplicon from HarP isoform
DmPele-FLP	CAGAGCTCGGTATATCAGAAT	TTTGCGAGCGATCGAACATT	310 bp amplicon from full length copies only
KP-like	AAATTAATATTAGCAGCGCGAAAC	TTAACCCTTAGCATGTCCGTGG	261 bp amplicon, KP-like variant from Harwich
Pele_IR	AACATAAGGTGGTCCCGTCG		From Rasmusson et al Genetics 1993
SV1008	TGCCGAGAATTTGGCACAGTCG	CTTATCGGCTGATTCAAGTTGTG	Genomic PCR for structural variants (depletions) predicted from TIDAL analysis of Harwich WGS data from Khurana et al Cell 2011
SV1058	TGCGTTCTGGCCACAATGCCGA	CATTATGCGATAAGCACTGGGAC
SV1070	GTCGAGCACGCGATGGCCCATAT	TGTATTGTCATCTTCGCTCGGAAA
SV136	GCGCAGTGCGGAATATAAATCA	TCAGGATGAAAGAGCGAACGAA
SV1556	AAAGTTGGCAGCGATTTTCCAG	TGAAAGTTTACAGCTGAGGGCA
SV1709	GCCCTCGAATGAAACAAAGGAC	CCTCCGGTTTAAGCTATTGGGT
SV2151	GTTGCTTCCGCTGTTATTTCCC	GGGGTGACAGTGTGGTTAGTT
SV227	TATTTACCTTCTGTCTCGCGCT	GGCTGACCATTGCCAAATAACA
SV2517	GGTGCAGTGCGAGACCTTGGA	CACATGAGGAACCATGCTGTGG
SV2672	GTGGACTTGACTCCATTCCATTCA	TTCCGCCTGCCAACTTCACTCCTCC
SV632	TGACCGAAAGTCATATAATAGCGG	AGATTCTTGTCCTTGACCAGCA
SV638	TGTGCAGCCTTCGAACAAGTA	AACGCCGTGGTGGCATTGATA
SV774	ATCTGCAGGATGTTTCCCTAGC	AGTCAATGGAGTTGAGTTGGCA
SV865	TGCAACTTGCTATGTAGACACA	TCGGCATCCAGTTCGGCATTAG
SV1941	GTAGTTGCCGCTGCTGTTGTTG	TATGGGTGTAACGTGTTTACACT
D46D51_1	GAGCAAAGCAAACTGAAAACTG	ATGCCACACTTAGGAAGTTCAATA	Genomic PCR primers for HISR-D 46 and D-51 lines for 27 shared P-element insertions loci. Co-ordinates used from TIDAL predictions of P-element insertions from Whole genome sequencing data
D46D51_2	CTCGGTGCGAAGACAATGAGG	CTGCACCACGGCAACACTCGTC
D46D51_3	GATAAGATTTCTCGGAATTGG	CGGCGCACTGTGGTATTTTATCG
D46D51_4	TGCATTGTTCTTGAGGTCCGC	GAAAATACACTAAGTTAAGCCTCG
D46D51_5	TCTGCAGAAGAGTTCTGCAAG	ATTTCTTTAGAAAACGCAAAGCAA
D46D51_6	GGAACTCTACGGCTATCCAAC	ATATTTTTTATGTATACGCACTTA
D46D51_7	TTGCCAGCCGTTTCTTTGTTCG	GCGATTTCTGCTGACGGAAATTGC
D46D51_8	TGTCGACTTCGACTGCAGCGC	ACGCAAGAGATCGTAGTTAAGAG
D46D51_9	CTTTTCAGCTTTAGCTTTTCTTGG	TATTACAAAGCACACATACACCGA
D46D51_10	TTTATTACCTGAGACATTATATTC	ACTGACTGGTAATCGGCGCTC
D46D51_11	AAAGTTGTATAATTTTTCAACAC	TCCTGTGGCTGCTTCCTCTTC
D46D51_12	CACTCTCTCGCACTGTCCAATGC	CTCTGCCGGTTTAAGGATTAACAC
D46D51_13	TAACTTAACATTAACAAAGCTTC	GTTTGTTTACTCTTTTGGAATATC
D46D51_14	ACATAAAATTTACAGTTACGTGG	TTTGGCCGTTATTCATTACTTCGC
D46D51_15	TAAATTTTATATTTCATGCTACAA	TTATCCGCAGTTTCTGCGTTTCC
D46D51_16	TTCATATTATCTTAATCGACTTGC	GGTCATCTCACTCGCACCAGAAAC
D46D51_17	AAAACAAAGCAAACTCCATCAAAC	ACTTACCCACAGTTCTTCATG
D46D51_18	GCAAATAGCAAATGTCGTCATG	ATCGATGCATCGCCTTATATCGAT
D46D51_19	TAAATGTGCATATGGTATCAACTC	AAGCGGAGAGGAGAGTCGCGA
D46D51_20	AAATAGAAACAAACAATTTATTGA	AGTTTCAATTTCACGCGAATAGAC
D46D51_21	CGGAAAACAAATTATTCATGACGT	AGACAGCCATGGTCATCACCATA
D46D51_22	GAGATCTTTGATCTGGCTAAG	CATTTGACTCAAACAAGTTTGTTG
D46D51_23	TAAATAGAAATACAGTAACCAG	CATGCAGCGCGGTTGGAGTAC
D46D51_24	TCATAGATCGAAAACAGGTGATAC	TTCTCTCTCTTTGTTTTGAAG
D46D51_25	TGTAAAGTGATCTCTCCGCAG	AGTTGACACGTCCTCACTCGA
D46D51_26	TGGCACCAACTCTCTTATTTGTG	TAATTACCGTTAACCAAGCCTAG
D46D51_27	GAAAGCCGGATGGTATAAAAGAG	TATTAACTTACACATATTTAATGG
Oligo Name	Forward	Reverse	Purpose
D46only_1	TTATCGGAAGACAAACGGCGA	CAAATGACGCGAGTTGACGAA	Genomic PCR Primers for P-element insertions unique to HISR-D 46 line. Co-ordinates used from TIDAL predictions of P-element insertions from Whole genome sequencing data
D46only_2	ACCTGATCCGCTCAGTGTTT	ATCAGAGAAGCATTCGACTAA
D46only_3	TTTGTGCTCGATGGTTCGGA	ATTGCCCAGTGGAATTCGGA
D46only_4	CTGTTCTGCGAAACGGTAGCA	ATAGGCGAAGAAAGCGACGGAT
D46only_5	CGGTGATCAGAACATTGACGAG	AGCAACGTCGAACAGCAACT
D46only_6	ACCTGCTTAACTTGCTGCTCA	CTTGCATGCCGCTTTTCACTT
D46only_7	GTCGTCGACGGGATAAAGTCA	CGAACTTTCGAACGCACTGAA
D46only_8	CGCGCAGCACAGTAACAAA	GTCAATCGATAGAACGCCGAT
D46only_9	ACGGGACAATAACAAGAATAG	GTTGTTGCCGCTTGTTGTAGTTG
D51only_1	TGCAGAGCGACGAGAGCGATG	CCACGCTCTCTCAGTCGCTCT	Genomic PCR Primers for P-element insertions unique to HISR-D 51 line. Co-ordinates used from TIDAL predictions of P-element insertions from Whole genome sequencing data
D51only_2	AATGACAAAATAGTTGTAGAAAAG	CGGAGGCAGAACTGACGTCAGTTC
D51only_3	GGTTGATGAAAAAACTGATTC	AGCGGTGCAAATAGATAAACC
D51only_4	TCCAAAAGTCAGCGAGCAGAG	GCCGATGGCTCGCCTTTTATTCGA
D51only_5	CATAAAACGACTCGGACTCCA	TCAAGTCTTCATTACCAGTACT
D51only_6	AAGAAGTGTATAAATGGAAAGG	CTTCGGCTTCGGCTTCGGCTG
D51only_7	CATCGCTATAGAGTAAACTCTC	AAGAACCACTGTGTTATCTTAAAC
N10_3	TCATTGCTTAAAGAGAATCCG	GTTTACAACCCACTGTGCGAA	Genomic PCR primers for HISR-N 10 line P-element insertions loci, designed from co-ordinates from TIDAL predictions of P-element insertions from WGS
N10_4	GCACTGTCCAATGCCAAATCGT	GATGCAGATATAAACAGGCGC
N10_5	ACACCGATCGTAGTCGCGAT	CCTGCACCGTATGAAGCTCTC
N10_6	GTTCAAGCTCACAGAGCGCAAG	GTTTGTCTTGGCTCTCCCTA
N10_7	AGCGTCGGCAATTGCACATCC	GTCGAGTGTAGTTGAGTGGT
N10_8	CCTCATTACATCGCAGCACA	TTGTAAACATACGTTCAGAGC
N10_9	GAGCGCTTAGCTGTTCTTC	TTCAAAGAGCGCAAATGGGA
N10_10	AGTAAGCAATCCATTCGACTGT	GCTATATGGGCTTGGATTGGT
N10_11	TACCCTTGTATCGATGCTTTG	AGGTGGTAGTTATGCCACGT
N10_12	TCGACGCGACGTTGAATCTTC	ACATCAGCTGTGCCGAACAGC
N10_13	GTGCGAGCAAAGATGCCATAT	AGCTCGAGTCGGAGTTATCAA
N10_14	TGTGTGTGCGCGTTCTTCTAT	GTGCATCGGTGTGAGTGTGTA
N10_15	CTGCTTATCACTAGTCTCACTA	GATCCGCTCTCGGGCTCCAC
N10_16	TGAACATACTTATGATAGA	GACTCCTGCCTGCACATTGC
N10_17	ATCTGAGCAAGGACAGGACGG	CATTTGGGCCATAAATTGAGCAG
N10_18	CGTAAAGACTGATGATGGCTCA	CTCAGTGTCTTTAACGCACGCT
N10_19	ATGCAAACCACATAGAAACACT	GATTTGGATGCATCGGATACGG
N10_20	GTTAATGCCCAACAATGTTTAC	GGTCACTCTCCGCTCTTACA
N10_21	AACGCATGCGTCGCTCCAGC	ACGCTCTTCCGTCGCACTCTTC
N10_22	AGCCAAATGCCAAATGCAGAGCG	TAACACTATTGCAGTGAACTT
N10_23	GTTGTTTCCAGCAAATGCACG	CGCCGTCTTTCCATCACTTTG
N10N31_1	AGCACCGGGTAACTAGACC	CGTTCTTCGAAGGACTGAAG	Primers for 2 shared P-element insertions loci in HISR-N 10 and N-31 lines
N10N31_2	CCGAGATTTTCCAACAAGTTC	GTGACCGAAAGAGAGAGTCA
N17_1	GCCATCGCAACCGATCCGATG	ATCCGAACCGATCACCACTCC	Genomic PCR primers for HISR-N 17 line P-element insertions loci, designed from co-ordinates from TIDAL predictions of P-element insertions from Whole genome sequencing data
N17_2	TCGCCCGTTCGTTCCTTGGCTTG	AACAATCGCACCGATTACGCTGTC
N17_3	GGTTGTGAGCACTGCTAGGTTC	TAAGGAGCCGTTCGAACTGCTG
N17_4	AAACGAAATGTGCTCTGCTCA	GCCAAGTGAAAATCGAAGCTC
N17_5	GTGAAAGCTTCAATGCGAATAAG	ATTCAAATCGAATGCGCGAGTG
N17_6	TTTCATCAAAAGTGCGCCACACG	GTTGTGGAGAGTTGCGCGCAAG
N17_7	CGCATAACACATGCGGACAGG	GGAATTTTGAGTAGCCAATCTTTA
N17_8	TGATCTTTGGTAATAGCAAACA	CGGCTAAAGCGAGAGAGCAGAC
N17_9	CGGTCTTATATGCGTCCTTAG	CAATTGAAATTCACTTTACCGAA
N17_10	TCCTGTAGATCCGATTTGAATTTC	TATGTGACATCGATAAAGGAAGG
N17_11	CCATAATTCTCATAATTGAGATAT	AGCCGTGTACAATGATCTCGAG
N17_12	TCGCTATTTGGGGAATAAGTCAA	GACATCGACACACAAACACAAATG
N17_13	TCGCCTTGGGCAGTGGGATGA	CCAAAGCGAAGTGCAGTCGTC
N17_14	GTGGCGCTGCACTGTCTGATT	CTAAACGTAAGCACATACATCGAA
N17_15	CAGTGGCAGCAACAACAGCAAC	GTATTTATCACGCGCACCGATC
Oligo Name	Forward	Reverse	Purpose
N25_1	ATTGGCATCGCTGGAGCTTACC	ACCAGCTCTGGAGATGCTGCCT	Genomic PCR primers for HISR-N 25 line P-element insertions loci, designed from co-ordinates from TIDAL predictions of P-element insertions from Whole genome sequencing data
N25_2	ATCCGGCTGCGGGAAATACCC	GAGTGCAGCTCGTGCGGCTTAAG
N25_3	CTAGCGAGCGATTAGATTTCCA	ACCGCACCGCGCACAGTGGAA
N25_4	TTTCTAGGTAAGATCATAGATC	CAGGTTTCGCCTTGTTTATGTAGA
N25_5	GTTTTGTTTTCGCTTCGTAGTA	CTTCGCGCACGGATCGTTCGTTG
N25_6	GTCAACGATGACGTCACAGCG	GATAGATCGCGTTTGGTTAGCTTG
N25_7	CAGGTCAAAGCTCTGAAGCGTC	TGACGGCGGTCCTATGTCCTAC
N25_8	TCATATTGCTTAAGAAAATGTAC	CGATGGCCTCCTGGCTCAGAG
N25_9	ATTAAAAACTGCAATCAAAGTTTC	CGAGCGGCAATGTTGTTAGGAC
N25_10	GCCACAAATTAAAGTTAAAAGTG	CCTGCGTTATTTAGTGCAAACT
N25_11	ATTGTATGTATGAATGGTATGTAG	AGTAATAATTACTGCTGTACAAC
N25_12	CTGCCACGTAGAACACGATCATTG	AGAATATAATCAAGTGCAATAAC
N31_3	TTCAAGCAAGCCTTGGAAATCA	AGCGCGCTGCTTCGGCGAGA	Genomic PCR primers for HISR-N 31 line P-element insertions loci, designed from co-ordinates from TIDAL predictions of P-element insertions from WGS
N31_4	CCAATCCGGTGGATACGTCACG	CAGCAAGTGTGTGAGTTGCG
N31_5	CCAACCAGCCCCAGCCAATTG	TTATGAGCGGTGCAGCCCGCG
N31_6	CTATAACTGACGAGATCGGTGG	GCCGGTTCTATTGATAATG
N31_7	GCAGCTTCGGCGATGGCCCTT	CATTATCCGCTAACTGTGGAG
N31_8	CCGCAACTCACCTCTTAGGAA	AGACAACGAATGAGTGGTGCTC
N31_9	GATTGTTCGAATCTGATACTG	ATGGAGCTTTGAAGCACACGC
N31_10	TGGTCGCCAGGAAACTGTAT	CACTGCCATATGGCAGCACTGT
N31_11	TCGTAGTTTGTTCACATTTCGC	GCAATACTAGATTCCAAGCAC
N31_12	AGTTGGCATCACACGGTTG	ATGTCGGGACGGCGCGAA
N31_13	CACTGAAGGTCACAGCAGCCG	CGCTGTAACTGATCCGTGCGA
N31_14	GTAGGCAGGTAACACTTCGA	AGTGGTTTACGTATTTCTCCG
N31_15	CCGTTATATTCCGCAAGTCGC	CTGTTACGGTTGCACATTC
N31_16	ACGGCCTCTGCGCCATAACATA	CGTATACACCGAGCTCCATT
N31_17	AATCGAGATCCGAGATCCGTC	CACTCACCCACCGACCTTGG
N31_18	TCTACGACTTTCACACAGCT	GATGCATTAAGTCGCATACA
N31_19	TTCAACCAAATGGTAGTCTTTC	CACAATCGTTGCTCTCAGTG
N31_20	CTGCACATCGTAGTCCATACGT	CGTGCACTTTCTGCGATTGA
N31_21	CACCCTAGGCAAAGTACTCATCT	CGCCCTAAAGTGATGTAACAA
N31_22	CGATCGCCGGTCGCTTTCGGT	GAACATTAAATGGGTCCGACA
Droplet digital PCR probes
	DmPele7a F_primer	gcaataagtgcgagtgaaagg	Drosophila melanogaster strain INV-2 genotype w1118; In(2R)51F11-56E2 genomic sequence GenBank: JN805572.1
	DmPele7a ddPCR Probe	cgtattgagtctgagtgagacagcga FAM
	DmPele7a R_primer	cacggacatgctaagggtta
	DmRp49 F_primer	cccaagggtatcgacaacag	DmRp49
	DmRp49 Probe	tcgccgcttcaagggacagt HEX
	DmRp49 R_primer	gttcgatccgtaaccgatgt
