# Supplementary material for: Har-P, a short P-element variant, weaponizes P-transposase to severely impair Drosophila development
Source: eLife. 2019 Dec 17;8:e49948. doi: 10.7554/eLife.49948 (PMC6917496; doi:10.7554/eLife.49948)
Supplement: Supplementary file 2. [file elife-49948-supp2.xlsx]

## Sheet: Table_S2_SequencingStats
	SRIVISTAV ET AL.
	TableS2. Whole genome sequencing and small RNA sequencing metadata.					Study: SRP178563	Project: PRJNA514796
	Sample	Total reads	Genome mapping reads	% library mapping to genome	avg_read length	Fastq file names	SRR# Number
1	WGS_ISO1_SC	9517203	7750716	0.8143	75	ISO1_R1.fastq.gz, ISO1_R2.fastq.gz	SRR8436087
2	WGS_HARWICH_WT	17643151	14171748	0.8032	75	Harwich_R1.fastq.gz, Harwich_R2.fastq.gz	SRR8436086
3	WGS_HISR_D29	14484212	11630966	0.803	75	HISRD29_R1.fastq.gz, HISRD29_R2.fastq.gz	SRR8436085
4	WGS_HISR_D43	25094150	20325354	0.8099	75	HISRD43_R1.fastq.gz, HISRD43_R2.fastq.gz	SRR8436084
5	WGS_HISR_D46	17242781	13885220	0.8052	75	HISRD46_R1.fastq.gz, HISRD46_R2.fastq.gz	SRR8436091
6	WGS_HISR_D51	16828061	13813844	0.8208	75	HISRD51_R1.fastq.gz, HISRD51_R2.fastq.gz	SRR8436090
7	WGS_HISR_N10	9811809	7830643	0.798	75	HISRN10_R1.fastq.gz, HISRN10_R2.fastq.gz	SRR8436089
8	WGS_HISR_N17	10829186	8646980	0.7984	75	HISRN17_R1.fastq.gz, HISRN17_R2.fastq.gz	SRR8436088
9	WGS_HISR_N25	9644367	7741408	0.8026	75	HISRN25_R1.fastq.gz, HISRN25_R2.fastq.gz	SRR8436093
10	WGS_HISR_N31	8016209	6407503	0.7993	75	HISRN31_R1.fastq.gz, HISRN31_R2.fastq.gz	SRR8436092
11	WGS_pi[2]	13357745	10161014	0.7606	75	pi_2_R1.fastq.gz, pi_2_R2.fastq.gz	SRR8436095
12	WGS_Birm	18860026	15286337	0.8105	75	Birmingham_R1.fastq.gz, Birmingham_R2.fastq.gz	SRR8436094
13	sRNA_ISO1_SC	16690110	15953293	0.96	49	Dmel_ISO12018_sRNA.fastq	SRR8436097
14	sRNA_HARWICH_WT	15559138	14961236	0.96	41	Dmel_Har2018_sRNA.fastq	SRR8436096
15	sRNA_HISR_D29	7489478	7133808	0.95	40	Dmel_HI-D29_sRNA.fastq	SRR8436099
16	sRNA_HISR_D43	19477328	18644015	0.96	44	Dmel_HI-D43_sRNA.fastq	SRR8436098
17	sRNA_HISR_D46	22380336	21445125	0.96	46	Dmel_HI-D46_sRNA.fastq	SRR8436101
18	sRNA_HISR_D51	19700303	18896210	0.96	50	Dmel_HI-D51_sRNA.fastq	SRR8436100
19	sRNA_HISR_N10	12912060	12382378	0.96	41	Dmel_HI-N10_sRNA.fastq	SRR8436103
20	sRNA_HISR_N17	15431462	14808970	0.96	44	Dmel_HI-N17_sRNA.fastq	SRR8436102
21	sRNA_HISR_N25	12887765	12473453	0.97	46	Dmel_HI-N25_sRNA.fastq	SRR8436104
22	sRNA_HISR_N31	15994164	15412860	0.96	47	Dmel_HI-N31_sRNA.fastq	SRR8436105
